# Supplementary material for: Effects of CYP2C19 and CYP2D6 gene variants on escitalopram and aripiprazole treatment outcome and serum levels: results from the CAN-BIND 1 study
Source: PubMed Central journal article supplement (PMC9448818; doi:10.1038/s41398-022-02124-4), 2022-09-06
Supplement: 41398_2022_2124_MOESM1_ESM.pdf [file 41398_2022_2124_MOESM1_ESM.pdf]

## SUPPLEMENTARY MATERIALS

### Supplementary Methods

#### Clinical Sample

Participants included in this study were recruited from six different clinical centers across Canada including: Djavad Mowafaghian Centre for Brain Health in Vancouver, BC (n = 63), Hotchkiss Brain Institute in Calgary, AB (n = 33), Providence Care Hospital in Kingston, ON (n = 21), St. Joseph's Healthcare Hamilton in Hamilton, ON (n = 32), and University Health Network (n = 53) and Centre for Addiction and Mental Health (n = 9) in Toronto, ON (total sample, n = 211). Written, informed consent was obtained from all participants. All procedures of this study comply with the ethical standards for research with humans of each participating institution.

#### Collection of blood samples and quantification of serum drug and metabolite concentrations

Participants self-reported the time at which the last dosage of the study medication was taken during the collection of the blood samples. Serum concentration measurements of ESC, ARI and their respective major metabolites, (S-DCT) and (DHA), were performed at the CAMH Clinical Laboratory using LC-MS/MS technology. Briefly, a mix of deuterated internal standards (Cerilliant) was added to 100  $\mu$ L of each serum specimen, calibrator (Cerilliant) and quality control (MassCheck Antidepressants/Neuroleptics, Level 1 and Level 2). Proteins were precipitated with 300  $\mu$ L of 9:1 Acetonitrile:Methanol (Sigma-Aldrich) followed by 5 min centrifugation at 9000 rpm. 25  $\mu$ L of each supernatant was diluted with 200  $\mu$ L of 0.1% Formic acid (Sigma-Aldrich) and then analyzed on the LC-MS/MS platform consisting of ThermoFisher TSQ Quantum Ultra mass spectrometer coupled with ThermoFisher Surveyor LC pump and HTC PAL autosampler fitted with a Kinetex F5 2.6  $\mu$ m, 100 x 2.1 mm column (Phenomenex). Six minute gradient elution with 0.1% Formic Acid (mobile phase A) and Acetonitrile (mobile phase B) was applied. Collision energies ranged from 14 to 20. Mass transitions (M+H) were monitored in SIM mode as follows: ARI (448  $\rightarrow$ 285); DHA (446 $\rightarrow$ 285); Citalopram (325  $\rightarrow$ 109); Desmethyl-citalopram (314  $\rightarrow$ 109) Quantification was performed against a 7-point calibration curve ranging from 10 to 1000 ng/mL for each analyte. Assay limit of detection was 5 ng/mL. Vendor nominal means for quality controls were used to assess the assay accuracy for each of the four analytes at Level 1 and Level 2, respectively, and  $\pm$  15 % of nominal mean value combined with <15 % analytical precision was considered acceptable assay performance. Both the laboratory means and the assay precisions were within the set acceptance criteria. Data was analyzed with ThermoFisher XCalibur software.

## Description of measures of response outcome

Response status signifies the classification of patients as “responder” or “non-responder” if MADRS reduction of  $\geq 50\%$  or  $< 50\%$  from baseline was reached, respectively. For remission status, patients are classified as “remitter” if they achieved a MADRS total score of 10 or less; otherwise, they are classified as “non-remitter”. The percentage of symptom improvement was calculated by subtracting the total MADRS score from the baseline MADRS score and then dividing by the baseline MADRS score for each of the eight time points. These measures of response were selected, since continuous measures, such as percentage symptom improvement, capture more information and have higher power, whereas dichotomous measures, such as response status, has a particular clinical relevance since it is associated with MDD prognosis.

## Post-hoc mediation analyses

Mediation analyses were performed to investigate whether measures of ESC exposure mediated any significant relationships between *CYP2C19* or *CYP2D6* metabolizer groups and the outcome measures. The strength of the association between the *CYP2C19* or *CYP2D6* metabolizer groups (predictor variable) and measures of treatment response or side effect (outcome variable) must be attenuated or rendered non-significant when controlling for measures of ESC exposure (mediator variable) to establish partial or complete mediation, respectively.<sup>1,2</sup> R package “Mediation”<sup>3</sup> and “lavaan”<sup>4</sup> was used for continuous and binary variables, respectively, to perform nonparametric bootstrap analyses with 5000 iterations to calculate the estimate of the indirect (i.e. mediator) effect, which was considered significant when the 95% confidence interval (CI) excluded zero at  $p < 0.05$ .

## References

- <sup>1</sup>Baron RM, Kenny DA. The moderator–mediator variable distinction in social psychological research: Conceptual, strategic, and statistical considerations. *Journal of Personality and Social Psychology* 1986; **51**: 1173–1182.
- <sup>2</sup>MacKinnon DP, Lockwood CM, Hoffmann JM, West SG, Sheets V. A Comparison of Methods to Test Mediation and Other Intervening Variable Effects. *Psychol Methods* 2002; **7**: 83.
- <sup>3</sup>Tingley D, Yamamoto T, Hirose K, Keele L, Imai K, Trinh M *et al.* *mediation: Causal Mediation Analysis*. 2019 <https://CRAN.R-project.org/package=mediation> (accessed 7 Apr2021).
- <sup>4</sup>Savalei V, Rosseel Y. Computational Options for Standard Errors and Test Statistics with Incomplete Normal and Nonnormal Data in SEM. *Structural Equation Modeling: A Multidisciplinary Journal* 2021; : 1–19.

## Supplementary Results

### Description of Study Sample

There were six cases of protocol deviations during Phase II, in which four responders at Week 8 received ESC + ARI, two non-responders remained on ESC monotherapy, and one responder started receiving ARI augmentation around the end of Phase II. These individuals were included in the treatment group in which they had been inadvertently allocated, except for the latter participant who remained in the ESC-Only group, since they were on ESC monotherapy for the majority of their treatment.

Analyses were conducted on 178 participants following exclusions with a mean age of 35.43 years (SD=12.77, range of 18-61 years) of which 110 (61.8%) of participants were female and 68 (38.2%) were male ( $\chi^2(1, N=178)=9.91, p=0.002$ ). Although a total of 129 (72.5%) participants were European, while 49 (27.5%) were non-European ( $\chi^2(1, N=178)=35.96, p<0.001$ ), Europeans were significantly overrepresented within *CYP2C19* NMs and RMs compared to non-European participants ( $\chi^2(5, N=178)=21.32, p<0.001$ ). 42% of participants were treated with AD at least once previously (range 1-5), whereas 58% were treatment naïve for their current major depressive episode. Eighteen (10%) were not taking concomitant medicines, including herbal and multivitamins.

Almost all participants (99%) were on ESC at 10 mg during Phase I, and then most received an increase in dosage to 20 mg during Phase II (89%). When splitting Phase II by treatment arm, 14% (n=10) and 6% (n=5) received 10 mg in the ESC-Only and ESC+ARI treatment arms, respectively, while one from each treatment arm received 15 mg, and the remaining received 20 mg. ARI dosage also did not vary in the ESC+ARI treatment arm with the majority of participants (98%) receiving 2 mg.

### Mediating effects of ESC exposure on significant associations of *CYP2C19* and *CYP2D6* metabolizer groups with outcome measures.

Since a trend was observed for an association between *CYP2C19* metabolizer status and symptom improvement during Phase II in the ESC-Only treatment arm, *post-hoc* mediation analyses were conducted to assess whether measures of ESC exposure were mediating this relationship. As shown in **Figure S22A-B**, there was a significant difference between *CYP2C19* IM+PMs and NMs in symptom improvement (Model 1: B=-14.97, SE=6.07, 95% CI: [-27.08, -2.85],  $p=0.016$ ) and in ESC<sub>adj</sub> serum concentrations (Model 2: B=1.00, SE=0.23, 95% CI: [0.54, 1.46],  $p<0.001$ ) at Week 16. After controlling for ESC<sub>adj</sub> serum concentrations, the

relationship between *CYP2C19* metabolizer group and total symptom improvement was no longer significant, whereas ESC<sub>adj</sub> serum concentration was significantly associated with total symptom improvement (Model 3: B=-6.70, SE=3.19, 95% CI: [-13.08, -0.32],  $p=0.040$ ), indicating a possible complete mediation. Additionally, results of the bootstrap procedure estimated a percent mediation of 45% (95% CI: [0.05, 1.71]) indicating that about half of the effect of *CYP2C19* IM+PM phenotype on symptom improvement may be mediated by ESC serum levels (**Figure S22C**). *CYP2D6* metabolizer groups were not significantly associated with symptom improvement in either Model 1 and 3. When covariates were included in the three models, the mediation effect was no longer observed, possibly due to insufficient sample size ( $n=69$ ). Further, there was no mediation effect when S-DCT or S-DCT/ESC ratio was replaced as mediators in the models.

Given a significant association between presence of CNS side effects and *CYP2D6* metabolizer group was observed in both treatment arms, mediation analyses were conducted to investigate whether the association between CNS side effects and *CYP2D6* metabolizer group was mediated by ESC<sub>adj</sub> serum levels using two regression models. In the first ordinary least squares regression model, higher ESC concentrations were significantly related to *CYP2D6* IM+PMs (B=0.92, SE=0.23, 95% CI: [0.46, 1.38],  $p<0.001$ ) in ESC-Only, but not in ESC+ARI (B=-0.10, SE=0.33, 95% CI: [-0.75, 0.55],  $p=n.s.$ ). In the second logistic regression model, which included *CYP2D6* metabolizer group and ESC<sub>adj</sub> serum levels as predictors of the presence of CNS side effects, neither *CYP2D6* metabolizer group (B=-0.55, SE=0.35, 95% CI: [-1.23, 0.13],  $p=n.s.$ ), nor ESC<sub>adj</sub> serum levels (B=-0.05, SE=0.16, 95% CI: [-0.37, 0.27],  $p=n.s.$ ) was significantly independently associated with the presence of CNS side effects in the ESC-Only treatment arm. In the ESC+ARI treatment arm, a possible mediation effect was observed with ESC<sub>adj</sub> serum concentration significantly associated with the presence of CNS side effects (B=0.50, SE=0.19, 95% CI: [0.14, 0.86],  $p=0.007$ ), whereas the relationship between *CYP2D6* metabolizer group and CNS side effects was no longer significant (B=0.55, SE=0.38, 95% CI: [-0.18, 1.29],  $p=n.s.$ ). Furthermore, in this treatment arm, a possible mediation effect was also observed with the presence of CNS side effects significantly associated with ARI<sub>adj</sub> serum concentration (B=0.05, SE=0.02, 95% CI: [0.09, 0.05],  $p=0.026$ ), but not with *CYP2D6* metabolizer group (B=0.57, SE=0.36, 95% CI: [1.28, 0.57],  $p=n.s.$ ). However, the bootstrap confidence intervals derived from 5000 samples indicated that the indirect effect coefficient was not significant (ESC-Only: B=-0.04, SE=0.92,  $p=n.s.$ ; ESC+ARI: B=-0.06, SE=0.42,  $p=n.s.$ ), which did not support the hypothesis that the relation between the presence of CNS side effects and *CYP2D6* metabolizer group is mediated by ESC<sub>adj</sub> serum levels (or ARI<sub>adj</sub> serum levels in ESC+ARI treatment arm [B=0.06, SE=0.45,  $p=n.s.$ ]).

For the observed association between the presence of sexual side effects and *CYP2D6* metabolizer group in the ESC+ARI treatment arm, subsequent mediation analyses did not demonstrate a mediation effect by ESC<sub>adj</sub> or ARI<sub>adj</sub> serum levels on this relationship.

## Supplementary Discussions

No significant differences in serum ARI<sub>adj</sub> and DHA<sub>adj</sub> concentrations between *CYP2D6* NMs and IM+PMs were observed, while previous studies reported significantly higher ARI levels in IM+PMs than NMs when ARI is administered alone.<sup>1-3</sup> This provides further support for the phenoconversion of *CYP2D6* by ESC and S-DCT, as well as competition by ESC and ARI for *CYP2D6*. These factors may have contributed to higher concentrations of ARI in NMs and IMs of the ESC+ARI treatment arm compared to when ARI is administered alone, thereby decreasing the difference in ARI concentration between NMs, IMs and PMs (**Figure S20**). Similarly, a previous study had shown that the coadministration of paroxetine or fluoxetine, both SSRI which compete for and inhibits *CYP2D6*, resulted in large interindividual variability in the systematic clearance of ARI, with NMs showing more variability and decreased systematic clearance than IM+PMs.<sup>4</sup>

In ESC+ARI, more *CYP2D6* IM+PMs reported the presence of sexual side effects compared to NMs during Phase II, specifically decreased libido. *Post-hoc* comparisons revealed that the presence of decreased libido was significantly different between IMs and NMs. Given that ESC has been reported to pose a higher risk of sexual dysfunction compared to other antidepressants,<sup>5</sup> it is possible that significant increases in serum levels of ESC in *CYP2D6* IMs, caused by decreased *CYP2D6* activity, may negatively affect sexual functioning. However, when sexual side effect intensity was tested for correlations with serum concentrations of ESC<sub>adj</sub>, S-DCT<sub>adj</sub>, ARI<sub>adj</sub>, DHA<sub>adj</sub>, or their metabolite-to-drug ratio in this treatment arm, no significant correlations were observed. Mediation analyses also did not reveal a mediating effect by serum measures of drug on the relationship between *CYP2D6* and sexual side effects. Therefore, this relationship and its underlying mechanisms needs to be further studied in a larger sample.

## References

- 1 Hendset M, Hermann M, Lunde H, Refsum H, Molden E. Impact of the *CYP2D6* genotype on steady-state serum concentrations of aripiprazole and dehydroaripiprazole. *Eur J Clin Pharmacol* 2007; **63**: 1147–1151.
- 2 Suzuki T, Mihara K, Nakamura A, Kagawa S, Nagai G, Nemoto K *et al*. Effects of Genetic Polymorphisms of *CYP2D6*, *CYP3A5*, and *ABCB1* on the Steady-State Plasma Concentrations of Aripiprazole and Its Active Metabolite, Dehydroaripiprazole, in Japanese Patients With Schizophrenia. *Therapeutic Drug Monitoring* 2014; **36**: 651–655.
- 3 Jukic MM, Smith RL, Haslemo T, Molden E, Ingelman-Sundberg M. Effect of *CYP2D6* genotype on exposure and efficacy of risperidone and aripiprazole: a retrospective, cohort study. *The Lancet Psychiatry* 2019; **6**: 418–426.
- 4 Azuma J, Hasunuma T, Kubo M, Miyatake M, Koue T, Higashi K *et al*. The relationship between clinical pharmacokinetics of aripiprazole and *CYP2D6* genetic polymorphism: effects of CYP enzyme inhibition by coadministration of paroxetine or fluvoxamine. *Eur J Clin Pharmacol* 2012; **68**: 29–37.
- 5 Reichenpfader U, Gartlehner G, Morgan LC, Greenblatt A, Nussbaumer B, Hansen RA *et al*. Sexual dysfunction associated with second-generation antidepressants in patients with major depressive disorder: results from a systematic review with network meta-analysis. *Drug Saf* 2014; **37**: 19–31.

**Table S1.** Items on the Toronto Side Effects Scale grouped into four categories.

|     | Central Nervous System | Gastrointestinal System | Sexual Functioning | Weight gain |
|-----|------------------------|-------------------------|--------------------|-------------|
| 1.  | Agitation              | Abdominal pain          | Anorgasmia         | Weight gain |
| 2.  | Blurred vision         | Constipation            | Decreased libido   |             |
| 3.  | Decreased sleepiness   | Decreased appetite      | Increased libido   |             |
| 4.  | Drowsiness             | Diarrhea                |                    |             |
| 5.  | Dizziness              | Dry mouth               |                    |             |
| 6.  | Flushing               | Dyspepsia               |                    |             |
| 7.  | Headache               | Edema                   |                    |             |
| 8.  | Increased sleepiness   | Increased appetite      |                    |             |
| 9.  | Nervousness            | Nausea                  |                    |             |
| 10. | Postural hypotension   |                         |                    |             |
| 11. | Sweating               |                         |                    |             |
| 12. | Tremor                 |                         |                    |             |
| 13. | Twitching myoclonus    |                         |                    |             |
| 14. | Weakness and fatigue   |                         |                    |             |

**Table S2.** Description of human *CYP2D6* and *CYP2C19* gene variants genotyped in this study.

| <b>Allele</b>  | <b>Predicted Activity<sup>a</sup></b> |
|----------------|---------------------------------------|
| <i>CYP2C19</i> |                                       |
| *1             | Normal                                |
| *2             | Non-functional                        |
| *3             | Non-functional                        |
| *17            | Increased                             |
| <i>CYP2D6</i>  |                                       |
| *1             | Normal                                |
| *2             | Normal                                |
| *3             | Non-functional                        |
| *4             | Non-functional                        |
| *5             | Non-functional                        |
| *6             | Non-functional                        |
| *9             | Reduced                               |
| *10            | Reduced                               |
| *17            | Reduced                               |
| *36            | Reduced                               |
| *41            | Reduced                               |
| *2 (xN)        | Increased                             |
| *36            | Reduced                               |
| *4 (xN)        | Non-functional                        |
| *10 (xN)       | Reduced                               |
| *9 (xN)        | Reduced                               |
| *41 (xN)       | Reduced                               |

<sup>a</sup>Data extracted from SNPedia.com and consistent with guidelines by Clinical Pharmacogenetics Implementation Consortium (CPIC®).

**Table S3.** Distribution of *CYP2C19* and *CYP2D6* genotypes and predicted metabolizer status.

| Metabolizer Status    | Frequency (n, %) |            |              | Age (mean ± SD) | Genotypes (n)  |
|-----------------------|------------------|------------|--------------|-----------------|----------------|
|                       | Sample N=178     | ESC N=81   | ESC+ARI N=97 |                 |                |
| <b><i>CYP2C19</i></b> |                  |            |              |                 |                |
| NM                    | 71 (39.89)       | 33 (40.74) | 38 (39.18)   | 35.04 ± 12.96   | *1/*1 (71)     |
| IM                    | 51 (28.65)       | 22 (27.16) | 29 (29.90)   | 35.67 ± 12.74   | *1/*2 (39)     |
|                       |                  |            |              |                 | *2/*17 (10)    |
|                       |                  |            |              |                 | *1/*3 (1)      |
| PM                    | 5 (2.809)        | 3 (3.704)  | 2 (2.062)    | 34.20 ± 14.20   | *3/*17 (1)     |
|                       |                  |            |              |                 | *2/*2 (3)      |
|                       |                  |            |              |                 | *2/*3 (2)      |
| RM                    | 43 (24.16)       | 21(25.93)  | 22 (22.68)   | 35.91 ± 13.08   | *1/*17 (43)    |
| UM                    | 7 (3.933)        | 1 (1.235)  | 6 (6.186)    | 36.14 ± 12.54   | *17/*17 (7)    |
| Not known             | 1 (0.57)         | 1 (1.235)  | 0 (0)        | -               | -              |
| <b><i>CYP2D6</i></b>  |                  |            |              |                 |                |
| NM                    | 99 (55.62)       | 41 (50.61) | 58 (59.79)   | 36.61 ± 13.18   | *1/*2 (27)     |
|                       |                  |            |              |                 | *1/*1 (22)     |
|                       |                  |            |              |                 | *2/*4 (10)     |
|                       |                  |            |              |                 | *2/*41 (9)     |
|                       |                  |            |              |                 | *2/*2 (7)      |
|                       |                  |            |              |                 | *1/*41 (5)     |
|                       |                  |            |              |                 | *1/*36+*10 (4) |
|                       |                  |            |              |                 | *2/*5 (4)      |
|                       |                  |            |              |                 | *1/*9 (3)      |
|                       |                  |            |              |                 | *1/*17 (2)     |
|                       |                  |            |              |                 | *1/*10 (1)     |
|                       |                  |            |              |                 | *2/*3 (1)      |
|                       |                  |            |              |                 | *2/*36+*4 (1)  |
|                       |                  |            |              |                 | *2/*9 (1)      |
|                       |                  |            |              |                 | *2/*9 (xN) (1) |
|                       |                  |            |              |                 | *2/*17 (1)     |
|                       |                  |            |              |                 |                |
| IM                    | 60 (33.71)       | 30 (37.04) | 30 (30.93)   | 33.70 ± 12.86   | *1/*5 (8)      |
|                       |                  |            |              |                 | *36+10/*36 (5) |
|                       |                  |            |              |                 | *1/*4 (xN) (3) |
|                       |                  |            |              |                 | *10/*36+10 (3) |
|                       |                  |            |              |                 | *41/*41 (3)    |
|                       |                  |            |              |                 | *1/*3 (2)      |
|                       |                  |            |              |                 | *4/*41 (2)     |
|                       |                  |            |              |                 | *4/*10 (2)     |
|                       |                  |            |              |                 | *2/*4 (xN) (1) |
|                       |                  |            |              |                 | *4/*9 (1)      |
|                       |                  |            |              |                 | *4/*36+*10 (1) |
|                       |                  |            |              |                 | *5/*9 (1)      |
|                       |                  |            |              |                 | *5/*36+*10 (1) |
| *6/*41 (1)            |                  |            |              |                 |                |
| *9/*9 (1)             |                  |            |              |                 |                |



|           |           |           |           |               |                 |
|-----------|-----------|-----------|-----------|---------------|-----------------|
|           |           |           |           |               | *10/*41 (1)     |
|           |           |           |           |               | *36+*10/*41 (1) |
| PM        | 11 (6.18) | 5 (6.173) | 6 (6.186) | 38.45 ± 10.14 | *4/*4 (7)       |
|           |           |           |           |               | *4/*5 (2)       |
|           |           |           |           |               | *4/*6 (1)       |
|           |           |           |           |               | *5/*6 (1)       |
| UM*       | 2 (1.124) | 2 (2.469) | 0 (0)     | 35.50 ± 14.85 | *1/*2(xN) (1)   |
|           |           |           |           |               | *2/*2(xN) (1)   |
| Not known | 6 (3.371) | 3 (3.704) | 3 (3.093) | 27.67 ± 3.78  | -               |

\*Note: UMs for CYP2D6 were excluded from analyses due to the small sample size (n=2).

IM = Intermediate Metabolizer; NM = Normal Metabolizer; PM = Poor Metabolizer; RM = Rapid Metabolizer; SD = Standard error; UM = Ultrarapid Metabolizer.

**Figure S1.** Symptom improvement and ESC<sub>adj</sub> serum concentrations at Week 2 by *CYP2C19* and *CYP2D6* metabolizer phenotypes for Phase I dropouts.

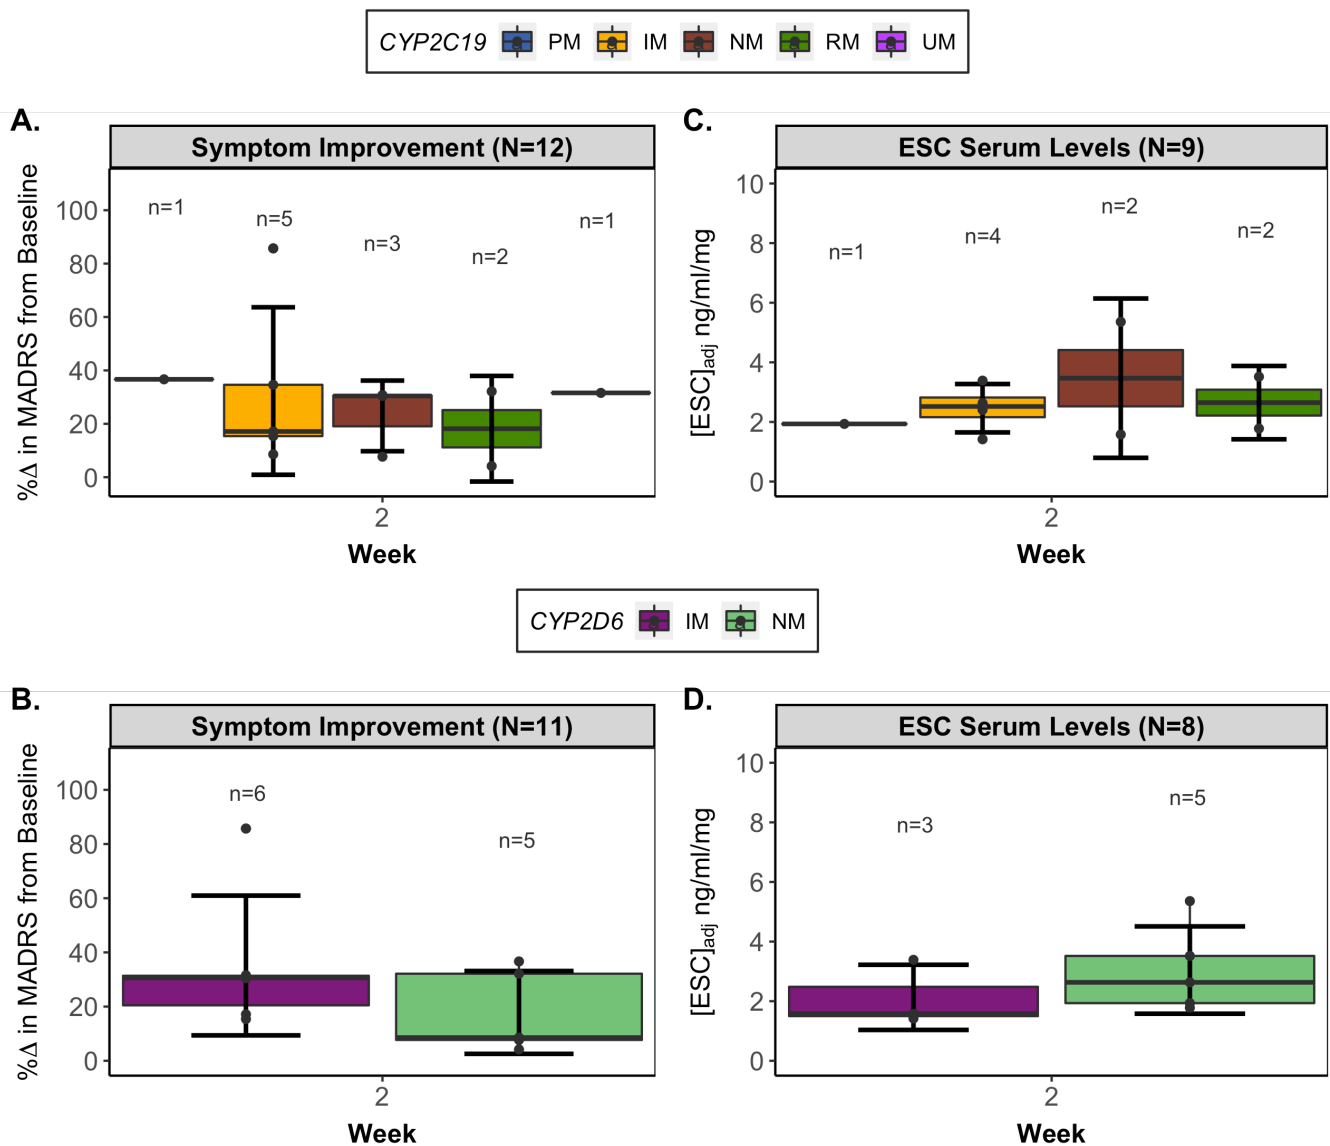

There were no differences in (A-B) symptom improvement (*CYP2C19*:  $H(4)=2.63$ ,  $p=0.621$ ; *CYP2D6*:  $H(1)=0.83$ ,  $p=0.361$ ) or (C-D) ESC serum concentrations (*CYP2C19*:  $H(3)=0.30$ ,  $p=0.960$ ; *CYP2D6*:  $H(1)=1.80$ ,  $p=0.180$ ) at Week 2 between *CYP2C19* and *CYP2D6* metabolizer phenotypes in dropouts for whom data was available. Error bars represent standard error.

ARI = Aripiprazole; ESC = Escitalopram; IM = Intermediate Metabolizer; NM = Normal Metabolizer; PM = Poor Metabolizer; RM = Rapid Metabolizer; UM = Ultra-rapid Metabolizer.

**Table S4.** Basic sample demographics and clinical information for the European subset.

| Characteristics                          | All           |                | CYP2C19           |                   | <i>p</i> -value <sup>1</sup> | CYP2D6         |                   | <i>p</i> -value <sup>2</sup> |
|------------------------------------------|---------------|----------------|-------------------|-------------------|------------------------------|----------------|-------------------|------------------------------|
|                                          | N = 129       | NM<br>(N = 57) | IM+PM<br>(N = 29) | RM+UM<br>(N = 42) |                              | NM<br>(N = 75) | IM+PM<br>(N = 51) |                              |
| Age                                      | 36.25 (13.12) | 35.47 (13.24)  | 37.48 (13.16)     | 36.57 (13.31)     | 0.715                        | 37.15 (13.61)  | 35.49 (12.58)     | 0.507                        |
| Sex                                      |               |                |                   |                   | 0.404                        |                |                   | 0.924                        |
| <i>Female</i>                            | 74 (57%)      | 29 (51%)       | 17 (59%)          | 27 (64%)          |                              | 42 (56%)       | 29 (57%)          |                              |
| <i>Male</i>                              | 55 (43%)      | 28 (49%)       | 12 (41%)          | 15 (36%)          |                              | 33 (44%)       | 22 (43%)          |                              |
| Previous AD treatment<br>for current MDE |               |                |                   |                   | 0.152                        |                |                   | 0.295                        |
| <i>None</i>                              | 74 (57%)      | 29 (51%)       | 21 (72%)          | 23 (55%)          |                              | 40 (53%)       | 32 (63%)          |                              |
| <i>1+</i>                                | 55 (43%)      | 28 (49%)       | 8 (28%)           | 19 (45%)          |                              | 35 (47%)       | 19 (37%)          |                              |
| ESC Dose at Week 8                       |               |                |                   |                   | 0.227                        |                |                   | >0.999                       |
| <i>10 mg</i>                             | 128 (99%)     | 57 (100%)      | 28 (97%)          | 42 (100%)         |                              | 74 (99%)       | 51 (100%)         |                              |
| <i>20 mg</i>                             | 1 (0.8%)      | 0 (0%)         | 1 (3.4%)          | 0 (0%)            |                              | 1 (1.3%)       | 0 (0%)            |                              |
| ESC Dose at Week 16                      |               |                |                   |                   | 0.899                        |                |                   | <b>0.007</b><br>**           |
| <i>10 mg</i>                             | 11 (9.2%)     | 4 (7.4%)       | 3 (12%)           | 4 (10%)           |                              | 2 (2.9%)       | 9 (19%)           |                              |
| <i>15 mg</i>                             | 1 (0.8%)      | 1 (1.9%)       | 0 (0%)            | 0 (0%)            |                              | 1 (1.4%)       | 0 (0%)            |                              |
| <i>20 mg</i>                             | 108 (90%)     | 49 (91%)       | 23 (88%)          | 35 (90%)          |                              | 67 (96%)       | 38 (81%)          |                              |
| Phase II Treatment Arm                   |               |                |                   |                   | 0.339                        |                |                   | 0.152                        |
| <i>ESC</i>                               | 58 (45%)      | 29 (51%)       | 10 (34%)          | 18 (43%)          |                              | 30 (40%)       | 27 (53%)          |                              |
| <i>ESC+ARI</i>                           | 71 (55%)      | 28 (49%)       | 19 (66%)          | 24 (57%)          |                              | 45 (60%)       | 24 (47%)          |                              |
| Baseline MADRS Score                     | 29.83 (5.25)  | 30.05 (5.29)   | 29.38 (4.78)      | 29.79 (5.63)      | 0.911                        | 30.69 (5.56)   | 28.63 (4.62)      | <b>0.043</b><br>*            |
| CYP2C19 Metabolizer<br>Groups            |               |                |                   |                   | -                            |                |                   | 0.700                        |
| <i>NM</i>                                | 57 (45%)      | -              | -                 | -                 |                              | 35 (47%)       | 20 (39%)          |                              |
| <i>IM+PM</i>                             | 29 (23%)      | -              | -                 | -                 |                              | 16 (21%)       | 13 (25%)          |                              |
| <i>RM+UM</i>                             | 42 (33%)      | -              | -                 | -                 |                              | 24 (32%)       | 18 (35%)          |                              |
| CYP2D6 Metabolizer<br>Groups             |               |                |                   |                   | 0.700                        |                |                   | -                            |
| <i>NM</i>                                | 75 (60%)      | 35 (64%)       | 16 (55%)          | 24 (57%)          |                              | -              | -                 |                              |
| <i>IM+PM</i>                             | 51 (40%)      | 20 (36%)       | 13 (45%)          | 18 (43%)          |                              | -              | -                 |                              |

<sup>1</sup>Kruskal-Wallis rank sum test; Pearson's Chi-squared test; Fisher's exact test

<sup>2</sup>Wilcoxon rank sum test; Pearson's Chi-squared test; Fisher's exact test

AD = Antidepressant; ARI = Aripiprazole; ESC = Escitalopram; IM = Intermediate Metabolizer; MADRS = Montgomery-Åsberg Depression Rating Scale; MDE = Major Depressive Episode; NM = Normal Metabolizer; PM = Poor Metabolizer; RM = Rapid Metabolizer; SD = Standard error; UM = Ultra-rapid Metabolizer.

\*  $p < 0.05$ ; \*\*  $p < 0.01$ ; \*\*\*  $p < 0.001$

**Table S5.** Summary of logistic regression models for response and remission status at the end of Phase I and II adjusted for adjusted for age, ancestry, recruitment site, sex, and total MADRS score at baseline as fixed effects.

| Independent Variables   | Phase I     |      |              |         | Phase II: ESC-Only |        |                 |         | Phase II: ESC+ARI |      |                    |         |
|-------------------------|-------------|------|--------------|---------|--------------------|--------|-----------------|---------|-------------------|------|--------------------|---------|
|                         | Odds Ratios | SE   | CI (95%)     | P-value | Odds Ratios        | SE     | CI (95%)        | P-value | Odds Ratios       | SE   | CI (95%)           | P-value |
| <b>Response Status</b>  |             |      |              |         |                    |        |                 |         |                   |      |                    |         |
| Intercept               | 2.15        | 2.92 | 0.15 – 30.76 | 0.572   | 34.90              | 128.83 | 0.03 – 48380.55 | 0.336   | 0.25              | 0.51 | 0.00 – 14.01       | 0.497   |
| CYP2C19 RM+UM           | 0.78        | 0.30 | 0.36 – 1.66  | 0.514   | 0.41               | 0.67   | 0.02 – 9.97     | 0.588   | 0.63              | 0.39 | 0.19 – 2.09        | 0.451   |
| CYP2C19 IM+PM           | 0.97        | 0.38 | 0.46 – 2.08  | 0.947   | 0.45               | 0.66   | 0.03 – 7.89     | 0.587   | 0.77              | 0.49 | 0.22 – 2.65        | 0.679   |
| CYP2D6 IM+PM            | 1.13        | 0.36 | 0.60 – 2.12  | 0.713   | 0.39               | 0.41   | 0.05 – 3.09     | 0.376   | 0.90              | 0.48 | 0.31 – 2.58        | 0.845   |
| Observations            | 170         |      |              |         | 71                 |        |                 |         | 82                |      |                    |         |
| R <sup>2</sup>          | 0.031       |      |              |         | 0.408              |        |                 |         | 0.165             |      |                    |         |
| AIC                     | 256.823     |      |              |         | 56.451             |        |                 |         | 122.088           |      |                    |         |
| <b>Remission Status</b> |             |      |              |         |                    |        |                 |         |                   |      |                    |         |
| Intercept               | 2.95        | 4.77 | 0.12 – 70.42 | 0.505   | 14.59              | 38.16  | 0.09 – 2457.95  | 0.306   | 3.98              | 7.83 | 0.08 – 187.77<br>7 | 0.482   |
| CYP2C19 RM+UM           | 0.89        | 0.38 | 0.38 – 2.08  | 0.791   | 0.42               | 0.38   | 0.07 – 2.47     | 0.339   | 0.87              | 0.51 | 0.28 – 2.73        | 0.814   |
| CYP2C19 IM+PM           | 1.13        | 0.49 | 0.48 – 2.66  | 0.774   | 0.66               | 0.55   | 0.13 – 3.37     | 0.616   | 1.38              | 0.80 | 0.45 – 4.27        | 0.576   |
| CYP2D6 IM+PM            | 1.26        | 0.45 | 0.63 – 2.54  | 0.513   | 1.35               | 0.91   | 0.36 – 5.09     | 0.660   | 0.64              | 0.32 | 0.24 – 1.73        | 0.379   |
| Observations            | 170         |      |              |         | 71                 |        |                 |         | 82                |      |                    |         |

|                |         |        |         |
|----------------|---------|--------|---------|
| R <sup>2</sup> | 0.106   | 0.230  | 0.096   |
| AIC            | 220.477 | 87.822 | 132.803 |

---

There were no significant impacts of either *CYP2C19* or *CYP2D6* metabolizer groups on response status (responder vs. non-responder) or remission status (remitter vs. non-remitter) at the end of Phase I or Phase II.

AIC=Akaike information criterion; ARI=Aripiprazole; CI=confidence interval; ESC=Escitalopram; IM = Intermediate Metabolizer; NM = Normal Metabolizer; PM = Poor Metabolizer; RM = Rapid Metabolizer; SE=standard error; UM = Ultra-rapid Metabolizer.

\* $p < 0.05$  \*\*  $p < 0.01$  \*\*\*  $p < 0.001$

**Table S6.** Summary of logistic regression models for response and remission status at the end of Phase I and II for the European subset, adjusted for age, ancestry, recruitment site, sex, and total MADRS score at baseline as fixed effects.

| Independent Variables   | <i>Phase I</i> |      |              |         | <i>Phase II: ESC-Only</i> |                      |                             |               | <i>Phase II: ESC+ARI</i> |                      |                             |               |
|-------------------------|----------------|------|--------------|---------|---------------------------|----------------------|-----------------------------|---------------|--------------------------|----------------------|-----------------------------|---------------|
|                         | Odds Ratios    | SE   | CI (95%)     | P-Value | Odds Ratios               | SE                   | CI (95%)                    | P-Value       | Odds Ratios              | SE                   | CI (95%)                    | P-Value       |
| <b>Response Status</b>  |                |      |              |         |                           |                      |                             |               |                          |                      |                             |               |
| <b>Intercept</b>        | 2.52           | 3.39 | 0.18 - 35.32 | 0.494   | 4.02x10 <sup>3</sup>      | 2.01x10 <sup>4</sup> | 0.22 – 7.27x10 <sup>7</sup> | 0.097         | 6.81                     | 18.60                | 0.03 – 1.44x10 <sup>3</sup> | 0.482         |
| <b>CYP2C19 RM+UM</b>    | 0.83           | 0.32 | 0.39 – 1.75  | 0.620   | 0.24                      | 0.36                 | 0.01 – 4.68                 | 0.346         | 0.50                     | 0.42                 | 0.10 – 2.60                 | 0.410         |
| <b>CYP2C19 IM+PM</b>    | 1.09           | 0.43 | 0.50 – 2.37  | 0.820   | 0.73                      | 1.14                 | 0.03 – 15.32                | 0.841         | 1.03                     | 0.79                 | 0.23 – 4.60                 | 0.971         |
| <b>CYP2D6</b>           | 1.13           | 0.37 | 0.59 – 2.15  | 0.720   | 0.34                      | 0.46                 | 0.02 – 4.79                 | 0.422         | 0.26                     | 0.19                 | 0.06 – 1.09                 | 0.065         |
| Observations            | 163            |      |              |         | 53                        |                      |                             |               | 63                       |                      |                             |               |
| R <sup>2</sup>          | 0.033          |      |              |         | 0.134                     |                      |                             |               | 0.347                    |                      |                             |               |
| AIC                     | 245.634        |      |              |         | 34.486                    |                      |                             |               | 87.267                   |                      |                             |               |
| <b>Remission Status</b> |                |      |              |         |                           |                      |                             |               |                          |                      |                             |               |
| <b>Intercept</b>        | 3.28           | 5.28 | 0.14 – 77.30 | 0.462   | 6.05x10 <sup>2</sup>      | 1.82x10 <sup>3</sup> | 1.66 – 2.20x10 <sup>5</sup> | <b>0.033*</b> | 4.07x10 <sup>2</sup>     | 1.12x10 <sup>3</sup> | 1.85 – 9.00x10 <sup>4</sup> | <b>0.029*</b> |
| <b>CYP2C19 RM+UM</b>    | 0.98           | 0.41 | 0.43 – 2.24  | 0.956   | 0.42                      | 0.46                 | 0.05 – 3.66                 | 0.432         | 1.93                     | 1.55                 | 0.40 – 9.34                 | 0.414         |
| <b>CYP2C19 IM+PM</b>    | 1.19           | 0.53 | 0.50 – 2.83  | 0.689   | 1.01                      | 0.95                 | 0.16 – 6.41                 | 0.991         | 2.47                     | 1.78                 | 0.60 – 10.15                | 0.209         |
| <b>CYP2D6</b>           | 1.22           | 0.44 | 0.60 – 2.48  | 0.584   | 1.90                      | 1.58                 | 0.37 – 9.69                 | 0.438         | 0.20                     | 0.14                 | 0.05 – 0.79                 | <b>0.021*</b> |
| Observations            | 163            |      |              |         | 53                        |                      |                             |               | 63                       |                      |                             |               |
| R <sup>2</sup>          | 0.118          |      |              |         | 0.197                     |                      |                             |               | 0.325                    |                      |                             |               |

---

There were no significant impacts of either *CYP2C19* or *CYP2D6* metabolizer groups on response status (responder vs. non-responder) or remission status (remitter vs. non-remitter) at the end of Phase I or Phase II for Europeans.

AIC = Akaike information criterion; ARI = Aripiprazole; CI = confidence interval; ESC = Escitalopram; IM = Intermediate Metabolizer; NM = Normal Metabolizer; PM = Poor Metabolizer; RM = Rapid Metabolizer; SE = standard error; UM = Ultra-rapid Metabolizer.

\* $p < 0.05$  \*\*  $p < 0.01$  \*\*\*  $p < 0.001$

**Figure S2.** Symptom improvement over time for Phase I and II by ungrouped *CYP2C19* and *CYP2D6* metabolizer phenotypes.

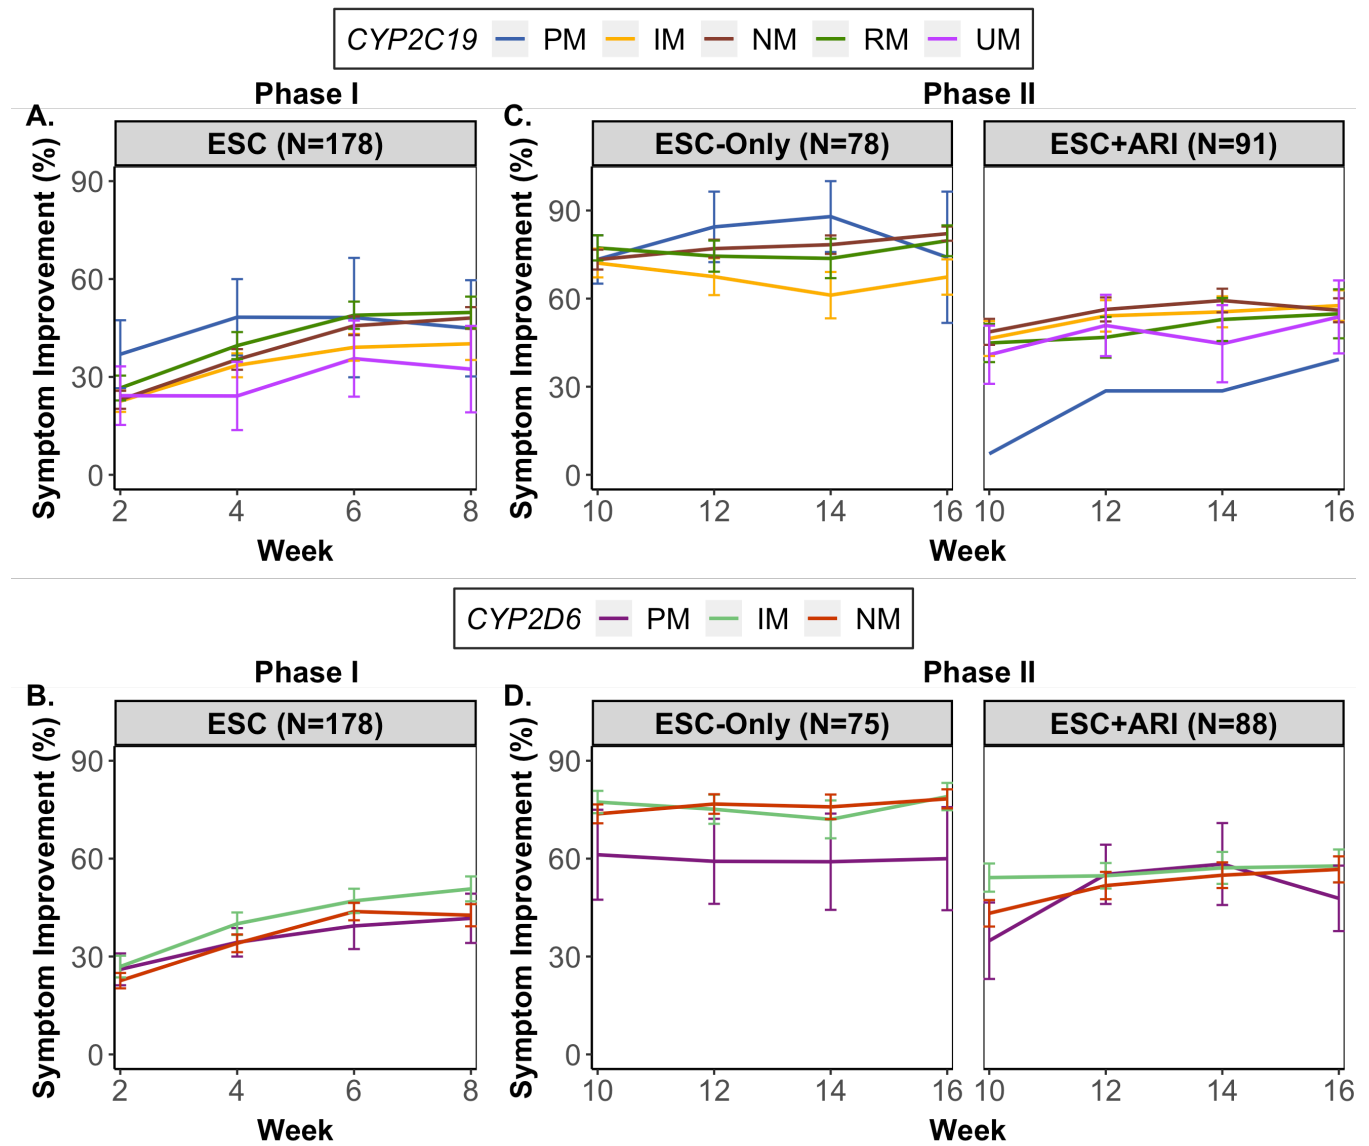

Descriptive plots of change in total MADRS scores from baseline by ungrouped *CYP2C19* and *CYP2D6* metabolizer phenotypes during Phases I and II. Error bars represent standard error.

ARI = Aripiprazole; ESC = Escitalopram; IM = Intermediate Metabolizer; NM = Normal Metabolizer; PM = Poor Metabolizer; RM = Rapid Metabolizer; UM = Ultra-rapid Metabolizer.



**Table S7.** Summary of mixed effects models for symptom improvement during Phase I and Phase II adjusted for age, ancestry, and sex as fixed effects, and recruitment site and individual as random effects variables.

| Fixed Effects                 | Phase I       |      |                  |                         |     | Phase II: ESC-Only |       |                |                         |     | Phase II: ESC+ARI |       |                |                     |     |
|-------------------------------|---------------|------|------------------|-------------------------|-----|--------------------|-------|----------------|-------------------------|-----|-------------------|-------|----------------|---------------------|-----|
|                               | Estimates     | SE   | CI (95%)         | P-Value                 | df  | Estimates          | SE    | CI (95%)       | P-Value                 | df  | Estimates         | SE    | CI (95%)       | P-Value             | df  |
| <b>Intercept</b>              | 21.19         | 8.29 | 4.90 – 37.48     | <b>0.011</b><br>*       | 505 | 58.69              | 13.49 | 32.10 – 85.29  | <b>&lt;0.001</b><br>*** | 207 | 42.21             | 14.02 | 14.60 – 69.81  | <b>0.003</b><br>**  | 239 |
| <b>Week</b>                   | 4.14          | 0.51 | 3.13 – 5.14      | <b>&lt;0.001</b><br>*** | 505 | 1.47               | 0.61  | 0.26 – 2.67    | <b>0.017</b><br>*       | 60  | 2.00              | 0.57  | 0.88 – 3.12    | <b>0.001</b><br>*** | 70  |
| <b>CYP2C19<br/>IM+PM</b>      | 3.27          | 5.64 | -7.87<br>– 14.41 | 0.563                   | 158 | 26.15              | 12.71 | 0.73 – 51.56   | <b>0.044</b><br>*       | 60  | -7.04             | 12.01 | -31.00 – 16.92 | 0.560               | 70  |
| <b>CYP2C19<br/>RM+UM</b>      | 3.74          | 5.71 | -7.53<br>– 15.01 | 0.513                   | 158 | 14.10              | 12.37 | -10.66 – 38.85 | 0.259                   | 60  | -5.02             | 12.17 | -29.28 – 19.24 | 0.681               | 70  |
| <b>CYP2D6<br/>IM+PM</b>       | 3.13          | 4.72 | -6.18<br>– 12.44 | 0.508                   | 158 | 1.19               | 10.27 | -19.35 – 21.73 | 0.908                   | 207 | 19.09             | 10.36 | -1.57 – 39.75  | 0.070               | 239 |
| <b>CYP2C19<br/>IM+PM*Week</b> | -1.48         | 0.69 | -2.84 – -0.12    | <b>0.033</b><br>*       | 505 | -2.34              | 0.85  | -4.02 – -0.66  | <b>0.007</b><br>**      | 207 | 0.45              | 0.77  | -1.08 – 1.97   | 0.565               | 239 |
| <b>CYP2C19<br/>RM+UM*Week</b> | -0.73         | 0.71 | -2.13 – 0.67     | 0.306                   | 505 | -1.04              | 0.86  | -2.73 – 0.64   | 0.223                   | 207 | 0.13              | 0.78  | -1.41 – 1.67   | 0.865               | 239 |
| <b>CYP2D6<br/>IM+PM*Week</b>  | 0.31          | 0.59 | -0.85 – 1.47     | 0.595                   | 505 | -0.41              | 0.71  | -1.81 – 0.99   | 0.566                   | 207 | -1.29             | 0.67  | -2.60 – 0.02   | 0.054               | 239 |
| <b>Random Effects</b>         |               |      |                  |                         |     |                    |       |                |                         |     |                   |       |                |                     |     |
| N                             | 170 SUBJLABEL |      |                  |                         |     | 72 SUBJLABEL       |       |                |                         |     | 82 SUBJLABEL      |       |                |                     |     |
|                               | 6 SITESYMBOL  |      |                  |                         |     | 6 SITESYMBOL       |       |                |                         |     | 6 SITESYMBOL      |       |                |                     |     |
| Observations                  | 679           |      |                  |                         |     | 283                |       |                |                         |     | 325               |       |                |                     |     |

AIC = Akaike information criterion; ARI = Aripiprazole; CI = confidence interval; ESC = Escitalopram; IM = Intermediate Metabolizer; NM = Normal Metabolizer; PM = Poor Metabolizer; RM = Rapid Metabolizer; SE = standard error; UM = Ultra-rapid Metabolizer.

\* $p < 0.05$  \*\*  $p < 0.01$  \*\*\*  $p < 0.001$

**Table S8.** Summary of mixed effects models for symptom improvement during Phase I and Phase II for the European subset, adjusted for age, ancestry, and sex as fixed effects, and recruitment site and individual as random effects variables.

| Fixed Effects         | Phase I       |      |                   |                         |     | Phase II: ESC-Only |       |                |                         |     | Phase II: ESC+ARI |       |                |                         |     |
|-----------------------|---------------|------|-------------------|-------------------------|-----|--------------------|-------|----------------|-------------------------|-----|-------------------|-------|----------------|-------------------------|-----|
|                       | Estimates     | SE   | CI (95%)          | P-Value                 | df  | Estimates          | SE    | CI (95%)       | P-Value                 | df  | Estimates         | SE    | CI (95%)       | P-Value                 | df  |
| Intercept             | 28.33         | 9.17 | 10.29 – 46.36     | <b>0.002</b><br>**      | 373 | 59.39              | 13.71 | 32.32 – 86.47  | <b>&lt;0.001</b><br>*** | 155 | 41.32             | 14.70 | 12.32 – 70.31  | <b>0.005</b><br>**      | 183 |
| Week                  | 4.16          | 0.56 | 3.05 – 5.27       | <b>&lt;0.001</b><br>*** | 373 | 1.76               | 0.61  | 0.55 – 2.97    | <b>0.005</b><br>**      | 43  | 2.25              | 0.63  | 1.00 – 3.51    | <b>&lt;0.001</b><br>*** | 52  |
| CYP2C19 IM+PM         | -0.36         | 6.81 | -13.84<br>– 13.12 | 0.958                   | 115 | 25.57              | 15.73 | -6.15 – 57.30  | 0.111                   | 43  | 6.44              | 13.91 | -21.47 – 34.35 | 0.645                   | 52  |
| CYP2C19 RM+UM         | 1.40          | 6.09 | -10.67<br>– 13.47 | 0.819                   | 115 | 13.26              | 11.95 | -10.84 – 37.35 | 0.273                   | 155 | -3.23             | 13.17 | -29.66 – 23.20 | 0.807                   | 183 |
| CYP2D6 IM+PM          | 5.90          | 5.39 | -4.77 – 16.58     | 0.276                   | 115 | 6.63               | 10.74 | -15.02 – 28.28 | 0.540                   | 43  | 15.32             | 11.74 | -8.24 – 38.88  | 0.198                   | 52  |
| CYP2C19 IM+PM*Week    | -1.29         | 0.86 | -2.98 – 0.41      | 0.136                   | 373 | -2.27              | 1.08  | -4.40 – -0.13  | <b>0.038</b><br>*       | 155 | -0.10             | 0.92  | -1.91 – 1.70   | 0.911                   | 183 |
| CYP2C19 RM+UM*Week    | -0.66         | 0.77 | -2.18 – 0.85      | 0.389                   | 373 | -0.88              | 0.82  | -2.49 – 0.74   | 0.285                   | 155 | 0.35              | 0.87  | -1.37 – 2.06   | 0.690                   | 183 |
| CYP2D6 IM+PM*Week     | 0.19          | 0.68 | -1.15 – 1.53      | 0.785                   | 373 | -0.64              | 0.74  | -2.10 – 0.81   | 0.384                   | 155 | -1.60             | 0.77  | -3.13 – -0.07  | <b>0.040</b><br>*       | 183 |
| <b>Random Effects</b> |               |      |                   |                         |     |                    |       |                |                         |     |                   |       |                |                         |     |
| N                     | 126 SUBJLABEL |      |                   |                         |     | 54 SUBJLABEL       |       |                |                         |     | 63 SUBJLABEL      |       |                |                         |     |
|                       | 6 SITESYMBOL  |      |                   |                         |     | 6 SITESYMBOL       |       |                |                         |     | 6 SITESYMBOL      |       |                |                         |     |
| Observations          | 503           |      |                   |                         |     | 213                |       |                |                         |     | 250               |       |                |                         |     |

AIC = Akaike information criterion; ARI = Aripiprazole; CI = confidence interval; ESC = Escitalopram; IM = Intermediate Metabolizer; NM = Normal Metabolizer; PM = Poor Metabolizer; RM = Rapid Metabolizer; SE = standard error; UM = Ultra-rapid Metabolizer.

\* $p < 0.05$  \*\*  $p < 0.01$  \*\*\*  $p < 0.001$

**Table S9.** Summary of logistic regression models assessing associations of the presence or absence of central nervous system, gastrointestinal, and sexual side effects, and treatment-related weight changes with *CYP2C19* and *CYP2D6* metabolizer groups during Phase I and II, adjusted for age, ancestry, sex, recruitment site, and total MADRS score at baseline.

| Fixed Effects                                    | Phase I     |      |              |              |                                               | Phase II: ESC-Only |      |              |                |                                             | Phase II: ESC+ARI |       |              |                |                                              |
|--------------------------------------------------|-------------|------|--------------|--------------|-----------------------------------------------|--------------------|------|--------------|----------------|---------------------------------------------|-------------------|-------|--------------|----------------|----------------------------------------------|
|                                                  | Odds Ratios | SE   | CI (95%)     | P-Value      | Summary                                       | Odds Ratios        | SE   | CI (95%)     | P-Value        | Summary                                     | Odds Ratios       | SE    | CI (95%)     | P-Value        | Summary                                      |
| <b>Central Nervous System (CNS) Side Effects</b> |             |      |              |              |                                               |                    |      |              |                |                                             |                   |       |              |                |                                              |
| <b>CYP2C19 IM+PM</b>                             | 0.95        | 0.44 | 0.38 – 2.37  | 0.909        |                                               | 0.82               | 0.66 | 0.17 – 4.02  | 0.803          |                                             | 1.51              | 1.38  | 0.25 – 9.07  | 0.651          |                                              |
| <b>CYP2C19 RM+UM</b>                             | 1.35        | 0.68 | 0.50 – 3.61  | 0.554        | N=169<br>R <sup>2</sup> =0.189<br>AIC=183.793 | 1.10               | 0.86 | 0.24 – 5.13  | 0.903          | N=70<br>R <sup>2</sup> =0.472<br>AIC=91.731 | 1.99              | 1.87  | 0.32 – 12.51 | 0.461          | N=82<br>R <sup>2</sup> =0.470<br>AIC=76.128  |
| <b>CYP2D6 IM+PM</b>                              | 0.76        | 0.30 | 0.35 – 1.65  | 0.481        |                                               | 0.13               | 0.10 | 0.03 – 0.61  | <b>0.010**</b> |                                             | 11.52             | 10.88 | 1.81 – 73.35 | <b>0.010**</b> |                                              |
| <b>Gastrointestinal Side Effects</b>             |             |      |              |              |                                               |                    |      |              |                |                                             |                   |       |              |                |                                              |
| <b>CYP2C19 IM+PM</b>                             | 0.59        | 0.25 | 0.26 – 1.33  | 0.204        |                                               | 0.20               | 0.18 | 0.03 – 1.18  | 0.076          |                                             | 1.02              | 0.63  | 0.31 – 3.42  | 0.971          |                                              |
| <b>CYP2C19 RM+UM</b>                             | 1.02        | 0.45 | 0.42 – 2.44  | 0.968        | N=168<br>R <sup>2</sup> =0.159<br>AIC=220.798 | 0.78               | 0.55 | 0.20 – 3.10  | 0.729          | N=71<br>R <sup>2</sup> =0.327<br>AIC=99.89  | 1.00              | 0.63  | 0.29 – 3.41  | 0.996          | N=82<br>R <sup>2</sup> =0.239<br>AIC=121.283 |
| <b>CYP2D6 IM+PM</b>                              | 1.09        | 0.39 | 0.55 – 2.19  | 0.801        |                                               | 0.86               | 0.53 | 0.26 – 2.89  | 0.805          |                                             | 0.72              | 0.39  | 0.25 – 2.08  | 0.545          |                                              |
| <b>Sexual Side Effects</b>                       |             |      |              |              |                                               |                    |      |              |                |                                             |                   |       |              |                |                                              |
| <b>CYP2C19 IM+PM</b>                             | 1.69        | 0.70 | 0.75 – 3.81  | 0.203        |                                               | 4.39               | 3.91 | 0.77 – 25.20 | 0.097          |                                             | 2.86              | 2.08  | 0.69 – 11.88 | 0.149          |                                              |
| <b>CYP2C19 RM+UM</b>                             | 1.74        | 0.70 | 0.78 – 3.85  | 0.174        | N=167<br>R <sup>2</sup> =0.071<br>AIC=239.312 | 1.18               | 0.93 | 0.25 – 5.54  | 0.830          | N=71<br>R <sup>2</sup> =0.152<br>AIC=96.641 | 2.10              | 1.45  | 0.55 – 8.10  | 0.279          | N=81<br>R <sup>2</sup> =0.259<br>AIC=106.338 |
| <b>CYP2D6 IM+PM</b>                              | 1.66        | 0.56 | 0.86 – 3.23  | 0.132        |                                               | 0.58               | 0.36 | 0.17 – 1.96  | 0.377          |                                             | 6.72              | 4.46  | 1.83 – 24.67 | <b>0.004**</b> |                                              |
| <b>Treatment-Related Weight Gain</b>             |             |      |              |              |                                               |                    |      |              |                |                                             |                   |       |              |                |                                              |
| <b>CYP2C19 IM+PM</b>                             | 3.21        | 1.96 | 0.97 – 10.62 | <b>0.056</b> | N=167<br>R <sup>2</sup> =0.117                | 2.93               | 3.81 | 0.23 – 37.29 | 0.406          | N=71<br>R <sup>2</sup> =0.223               | 1.07              | 0.65  | 0.32 – 3.52  | 0.917          | N=81<br>R <sup>2</sup> =0.145                |

|                          |      |      |             |       |             |      |      |              |       |                |      |      |             |       |             |
|--------------------------|------|------|-------------|-------|-------------|------|------|--------------|-------|----------------|------|------|-------------|-------|-------------|
| <b>CYP2C19<br/>RM+UM</b> | 1.83 | 1.21 | 0.50 – 6.67 | 0.359 | AIC=145.252 | 1.75 | 1.94 | 0.20 – 15.40 | 0.614 | AIC=67.50<br>1 | 1.10 | 0.65 | 0.34 – 3.52 | 0.876 | AIC=125.504 |
| <b>CYP2D6<br/>IM+PM</b>  | 0.95 | 0.47 | 0.36 – 2.50 | 0.911 |             | 0.49 | 0.44 | 0.08 – 2.84  | 0.426 |                | 0.65 | 0.35 | 0.23 – 1.85 | 0.420 |             |

AIC = Akaike information criterion; ARI = Aripiprazole; CI = confidence interval; ESC = Escitalopram; IM = Intermediate Metabolizer; NM = Normal Metabolizer; PM = Poor Metabolizer; RM = Rapid Metabolizer; SE = standard error; UM = Ultra-rapid Metabolizer.

\* $p < 0.05$  \*\*  $p < 0.01$  \*\*\*  $p < 0.001$

**Figure S3.** Subcategories of CNS side effects that were significantly associated with *CYP2D6* metabolizer groups at Week 16 by treatment arm.

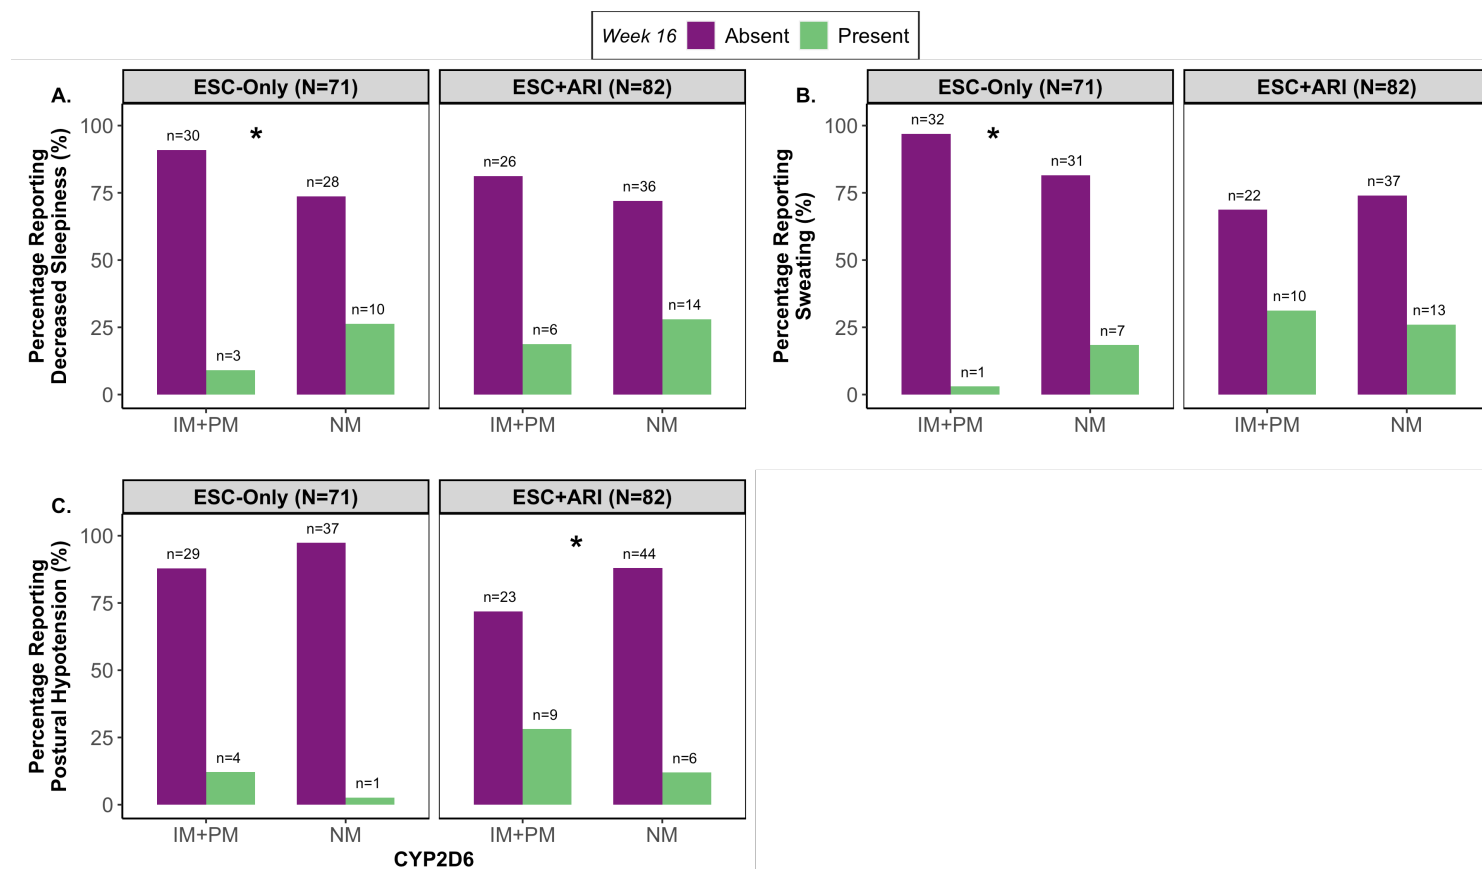

**(A)** The presence of decreased sleepiness was influenced by *CYP2D6* metabolizer groups in the ESC-Only treatment arm. The odds of reporting decreased sleepiness as a side effect was 25.53 (SE=33.30, 95% [CI 1.99, 328.18]) times higher for NMs compared to IM+PMs ( $\chi^2$  (1, N = 71) = 6.18,  $p=0.013$ ). **(B)** The presence of sweating was influenced by *CYP2D6* metabolizer groups in the ESC-Only treatment arm. The odds of reporting sweating as a side effect was 29.21 (SE=46.80, 95% CI [1.26, 676.37]) times higher for NMs compared to IM+PMs ( $\chi^2$  (1, N = 71) = 4.43,  $p=0.035$ ). **(C)** The presence of postural hypotension was influenced by *CYP2D6* metabolizer groups in the ESC+ARI treatment arm. The odds of reporting postural hypotension as a side effect was 8.07 (SE=6.89, 95% [CI 1.51, 43.04]) times higher for IM+PMs compared to NMs ( $\chi^2$  (1, N = 82) = 5.98,  $p=0.014$ ).

All logistic regression analyses were adjusted for adjusted for age, ancestry, sex, recruitment site, total MADRS score at baseline, and *CYP2D6* metabolizer groups.

ESC = Escitalopram; IM = Intermediate Metabolizer; NM = Normal Metabolizer; PM = Poor Metabolizer.

\*  $p < 0.05$

**Figure S4.** Subcategories of CNS side effects that were significantly associated with ungrouped *CYP2D6* metabolizer groups at Week 16 by treatment arm.

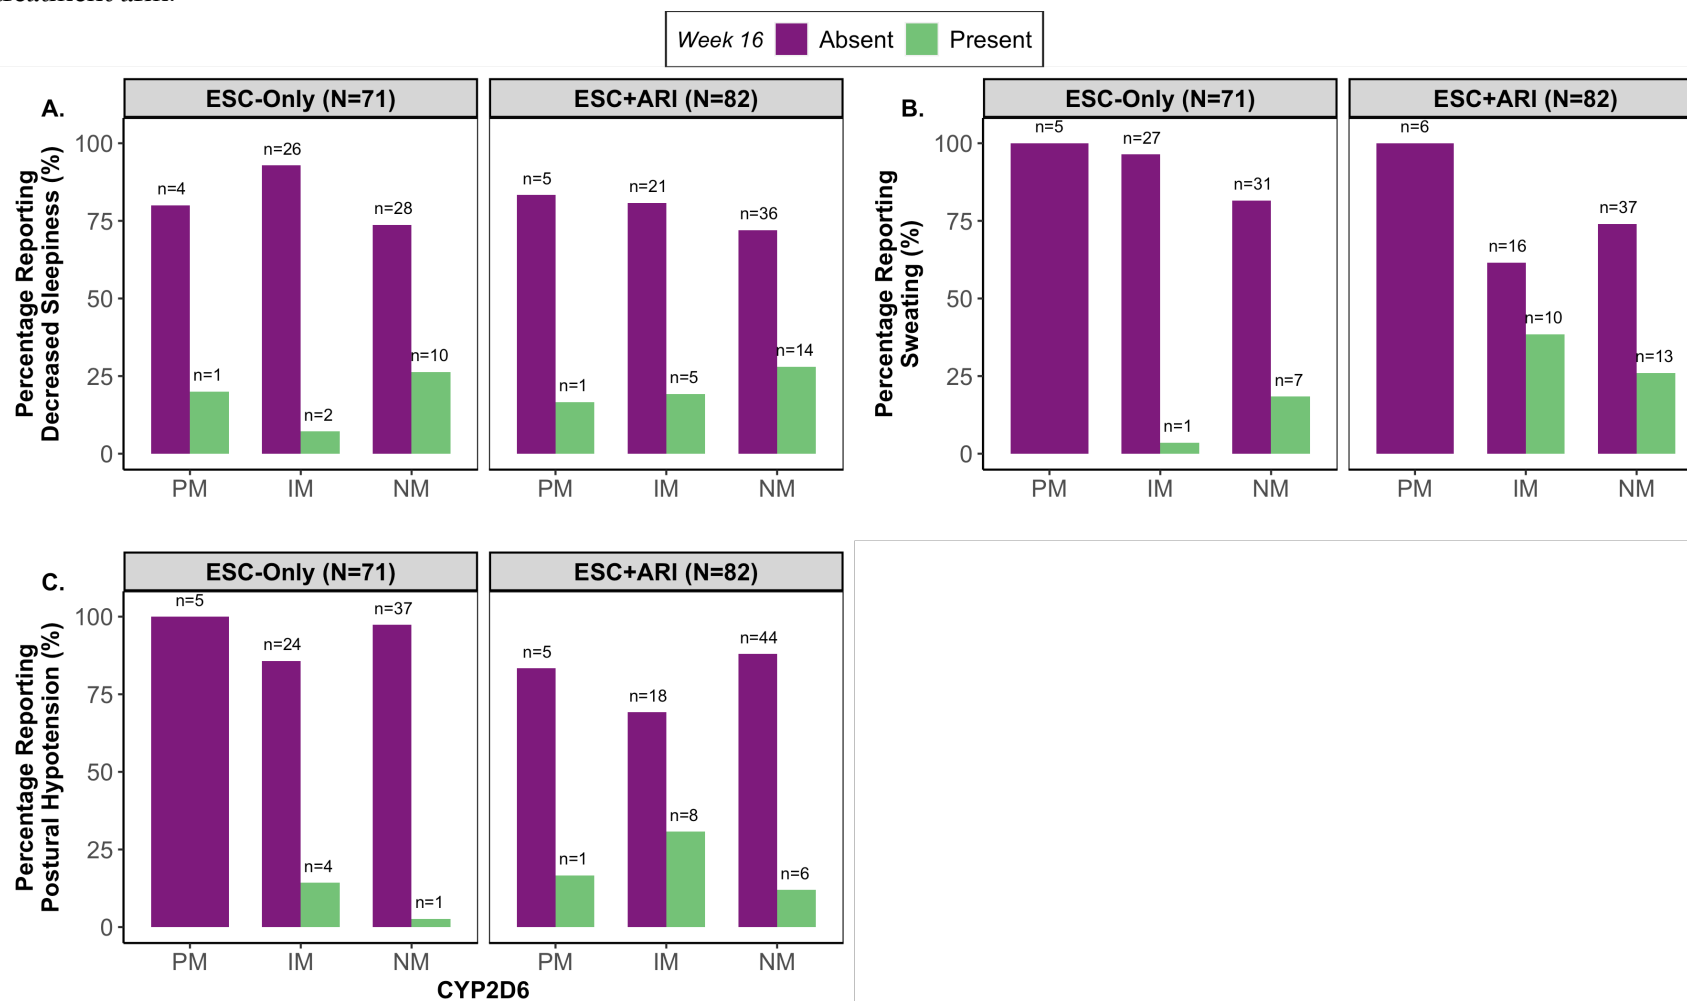

At Week 16, the likelihood of reporting **(A)** decreased sleepiness or **(B)** sweating were not significantly different between *CYP2D6* NMs, IMs and PMs, when the metabolizer phenotypes are assessed separately for either treatment arm. **(C)** *CYP2D6* IMs trended towards a 3.26 (95% CI [0.99, 10.74]) higher odds of reporting the presence of postural hypotension compared to NMs ( $\chi^2(1, N=81)=5.93, p=0.015$  for only the ESC+ARI treatment arm).

ARI = Aripiprazole; ESC = Escitalopram; IM = Intermediate Metabolizer; NM = Normal Metabolizer; PM = Poor Metabolizer.

# indicates trend with  $p$  between 0.050 to 0.070.

**Figure S5.** Sexual side effects self-reported to be present or absent by *CYP2C19* and *CYP2D6* metabolizer groups and treatment arm.

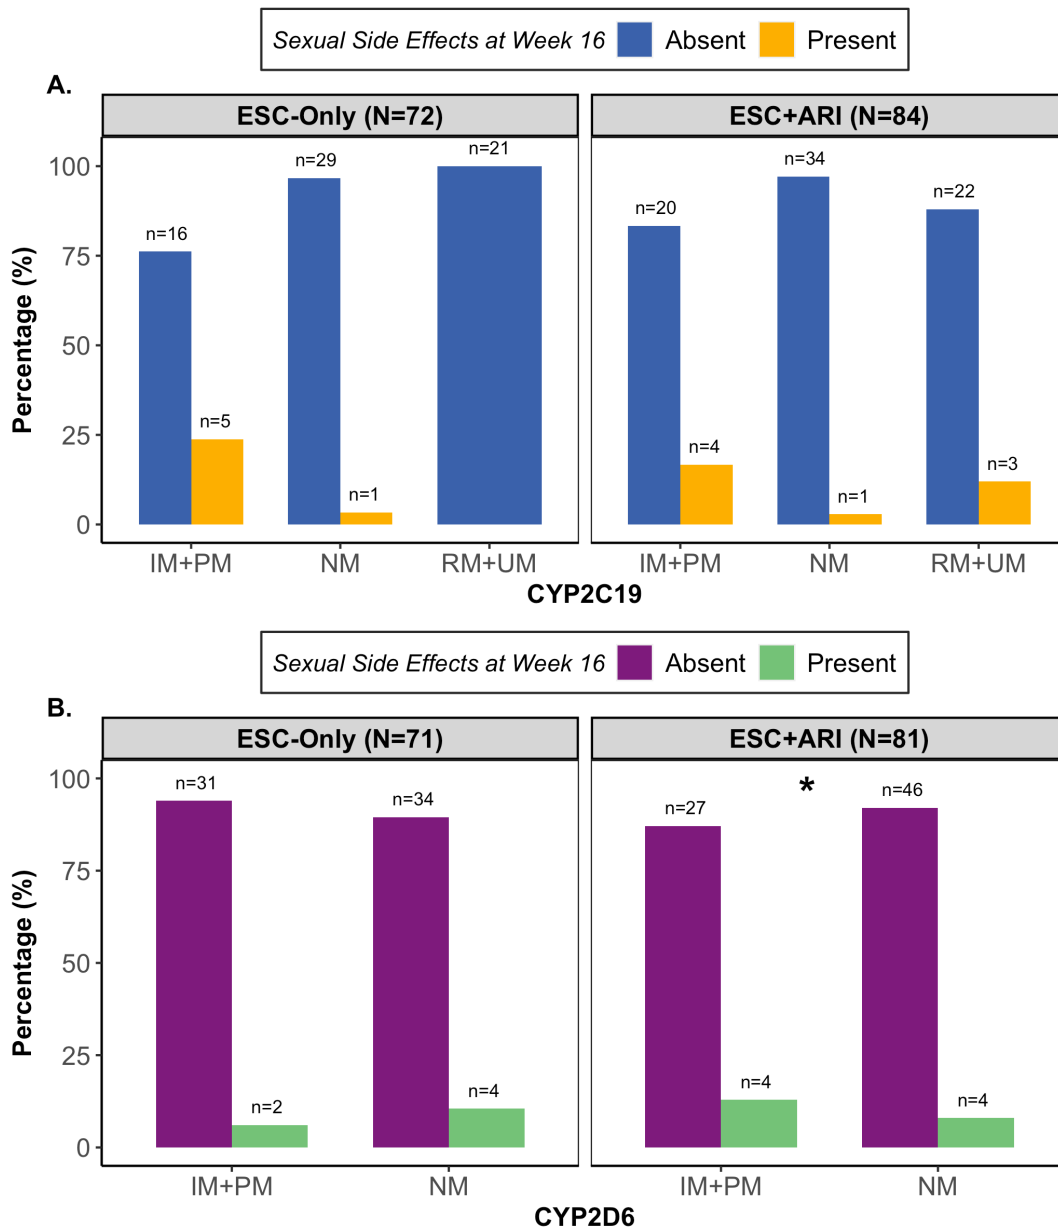

**(A)** Sexual (CNS) side effects did not show an association with *CYP2C19* metabolizer groups. **(B)** Presence of sexual side effects showed a trend for an association with *CYP2D6* metabolizer groups. In ESC+ARI, the odds of reporting a sexual side effect was 6.72 (95% CI 1.83, 24.67) times higher for IM+PMs compared to NMs ( $\chi^2(1, N = 81) = 8.26, p=0.004, q=0.046$ ). The ESC-Only treatment arm did not show the same effect.

All logistic regression analyses were adjusted for age, ancestry, sex, recruitment site, total MADRS score at baseline, *CYP2C19* and *CYP2D6* metabolizer groups. *P*-values are corrected for multiple testing using the false discovery rate (FDR) approach.

ARI = Aripiprazole; ESC = Escitalopram; IM = Intermediate Metabolizer; NM = Normal Metabolizer; PM = Poor Metabolizer; RM = Rapid Metabolizer; UM = Ultra-rapid Metabolizer.

\*  $q < 0.05$

**Figure S6.** Subcategory of sexual side effects that were significantly associated with *CYP2D6* metabolizer groups at Week 16 for the ESC+ARI treatment arm.

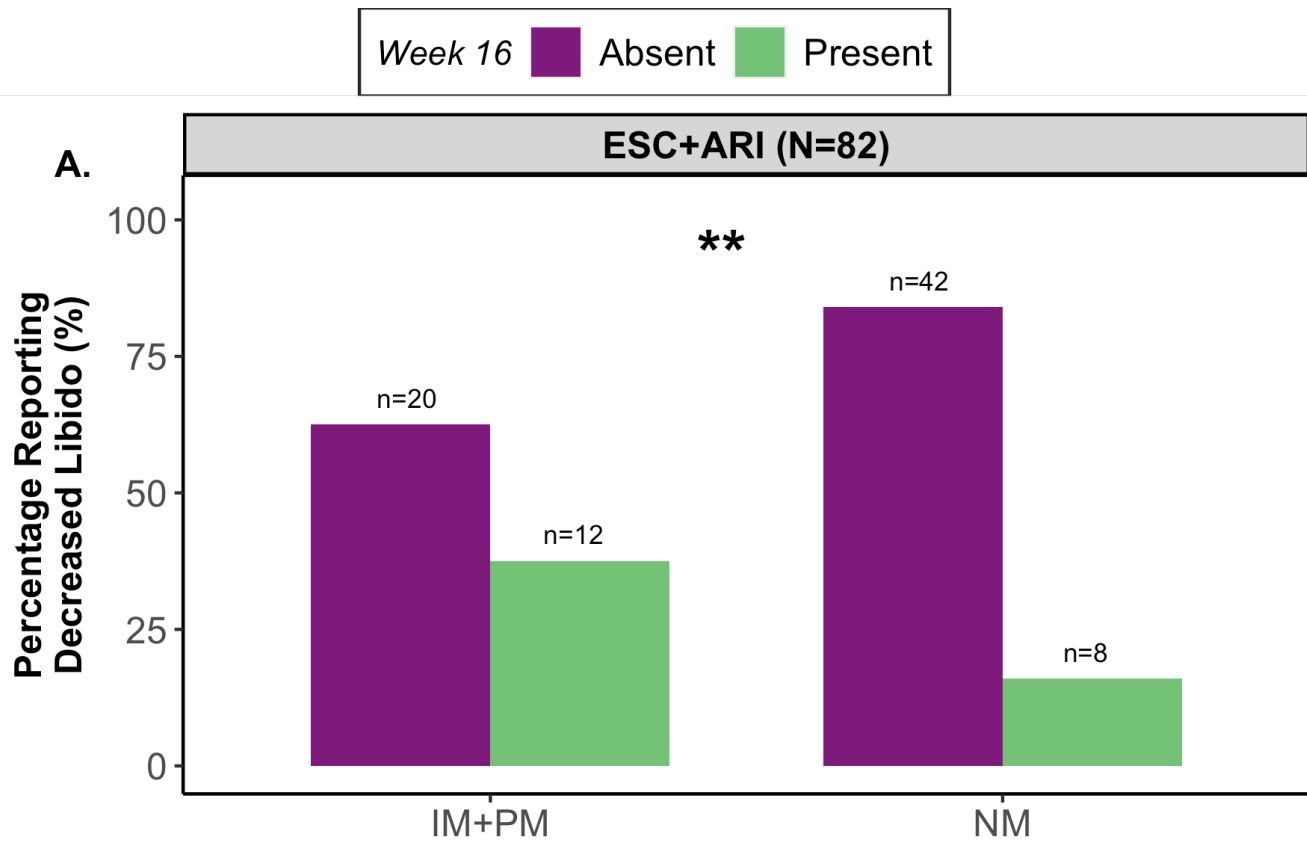

**(A)** The presence of decreased libido was influenced by *CYP2D6* metabolizer groups in the ESC+ARI treatment arm. The odds of reporting decreased sleepiness as a side effect was 9.63 (95% CI [1.97, 47.04]) times higher for IM+PMs compared to NMs ( $\chi^2(1, N = 82) = 7.84, p=0.005$ ). All logistic regression analyses were adjusted for adjusted for age, ancestry, sex, recruitment site, total MADRS score at baseline, and *CYP2D6* metabolizer groups.

ARI = Aripiprazole; ESC = Escitalopram; IM = Intermediate Metabolizer; NM = Normal Metabolizer; PM = Poor Metabolizer; RM = Rapid Metabolizer; UM = Ultra-rapid Metabolizer

\*  $p < 0.05$



**Figure S7.** Sexual side effects and decreased libido self-reported to be present or absent at Week 16 by ungrouped *CYP2D6* metabolizer phenotypes for the ESC+ARI treatment arm.

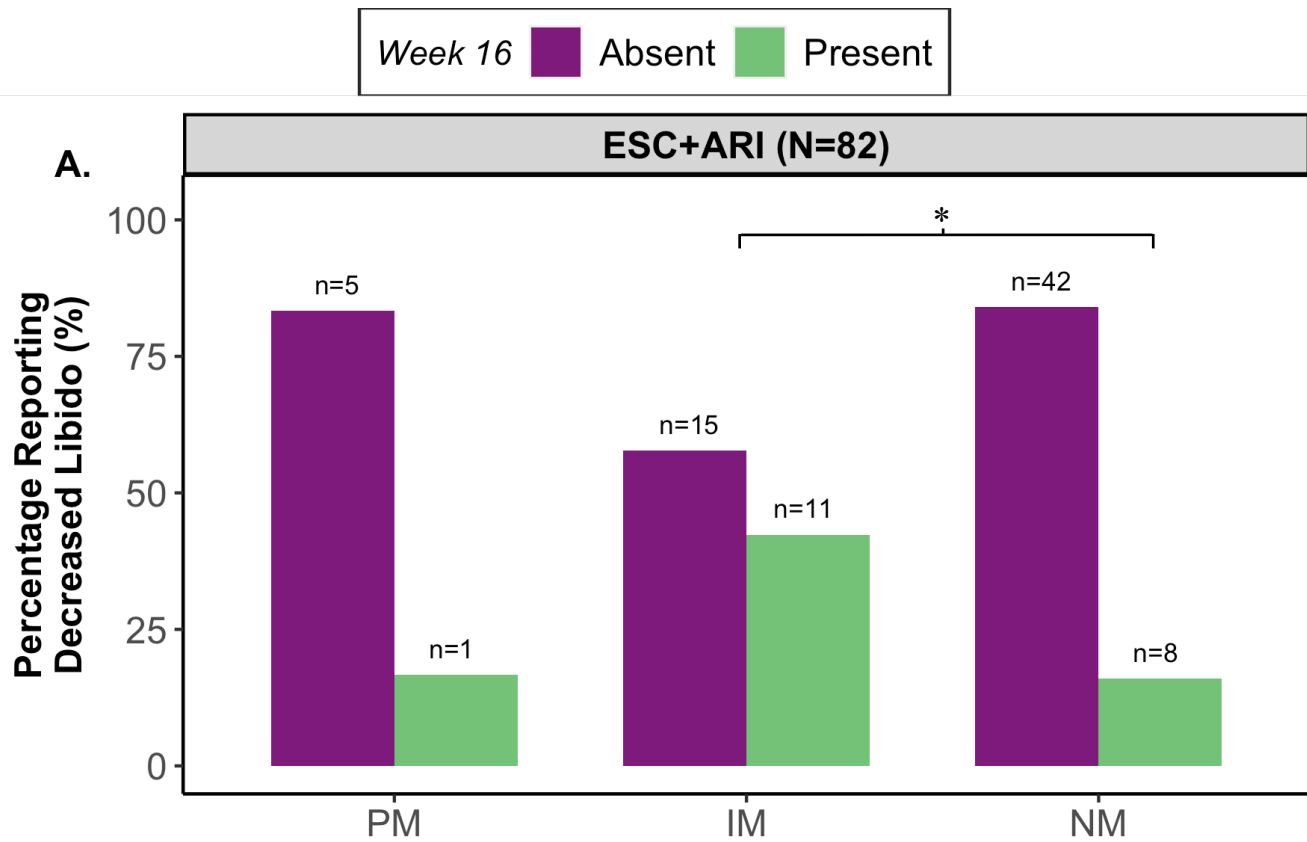

**(A)** At Week 16, *CYP2D6* IMs had 3.27 (95% CI [1.17, 9.18]) higher odds of reporting the presence of sexual side effects compared to NMs ( $\chi^2(1, N=81)=5.93, p=0.015$ ), specifically decreased libido (OR=3.85, 95% CI [1.30, 11.39]), while the likelihood of reporting a sexual side effect was not significantly different between NMs and PMs for ESC+ARI treatment arm.

ARI = Aripiprazole; ESC = Escitalopram; IM = Intermediate Metabolizer; NM = Normal Metabolizer; PM = Poor Metabolizer.

**Figure S8.** Gastrointestinal side effects self-reported to be present or absent by *CYP2C19* and *CYP2D6* metabolizer groups and treatment arm.

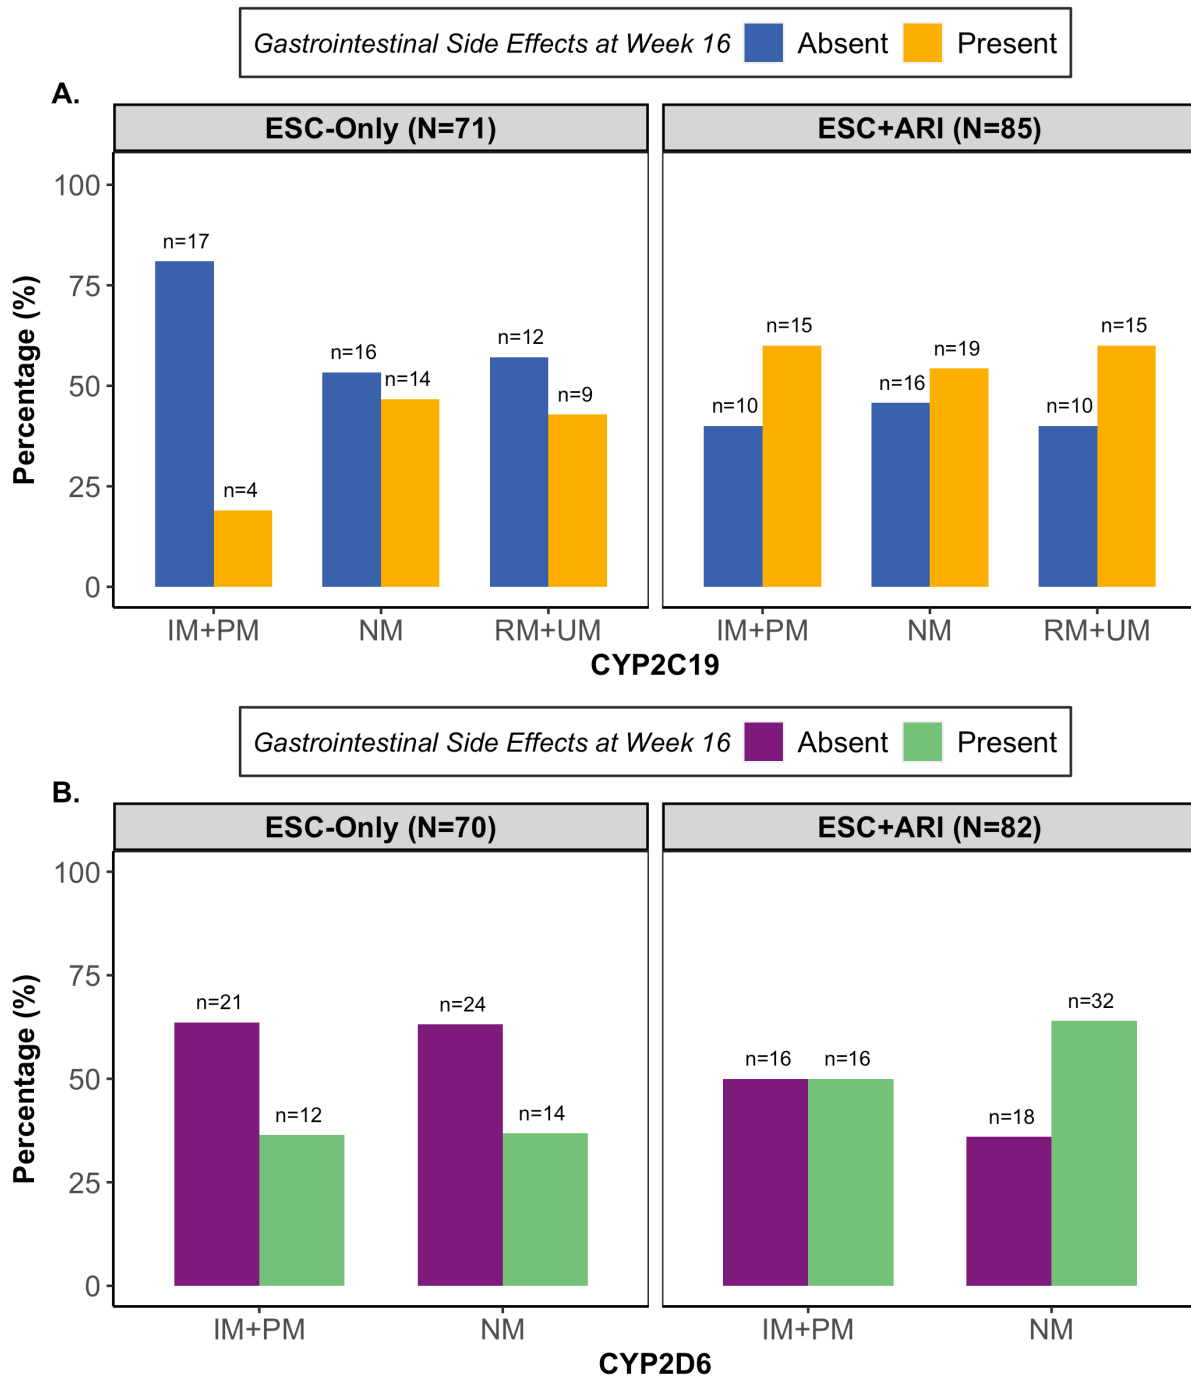

No associations between the presence of gastrointestinal side effects at trial end with either *CYP2C19* or *CYP2D6* metabolizer groups were observed.

All logistic regression analyses were adjusted for adjusted for age, ancestry, sex, recruitment site, total MADRS score at baseline, and *CYP2C19* and *CYP2D6* metabolizer groups.

ARI = Aripiprazole; ESC = Escitalopram; IM = Intermediate Metabolizer; NM = Normal Metabolizer; PM = Poor Metabolizer; RM = Rapid Metabolizer; UM = Ultra-rapid Metabolizer.

**Figure S9.** Treatment-related weight gain self-reported to be present or absent by *CYP2C19* and *CYP2D6* metabolizer groups and treatment arm.

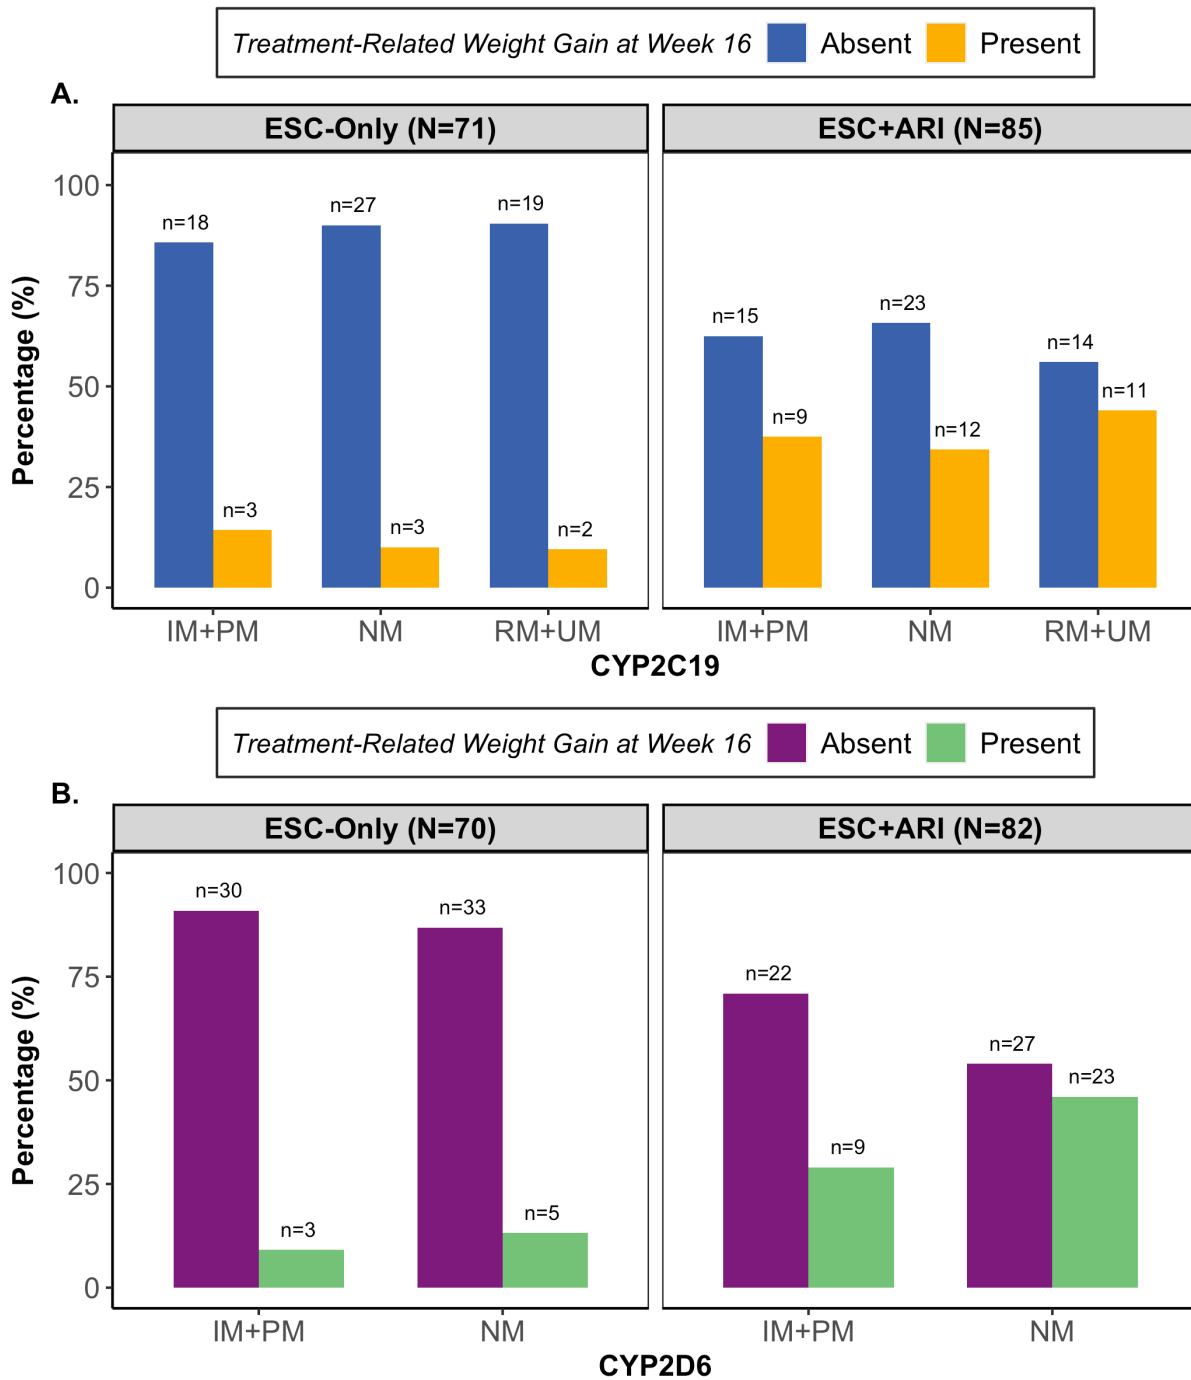

No associations between the treatment-related weight gain at trial end with either *CYP2C19* or *CYP2D6* metabolizer groups were observed.

All logistic regression analyses were adjusted for adjusted for age, ancestry, sex, recruitment site, total MADRS score at baseline, and *CYP2C19* and *CYP2D6* metabolizer groups.

ARI = Aripiprazole; ESC = Escitalopram; IM = Intermediate Metabolizer; NM = Normal Metabolizer; PM = Poor Metabolizer; RM = Rapid Metabolizer; UM = Ultra-rapid Metabolizer.

**Figure S10.** Intensity of central nervous system (CNS) side effects over time by *CYP2C19* and *CYP2D6* metabolizer group and treatment-arm.

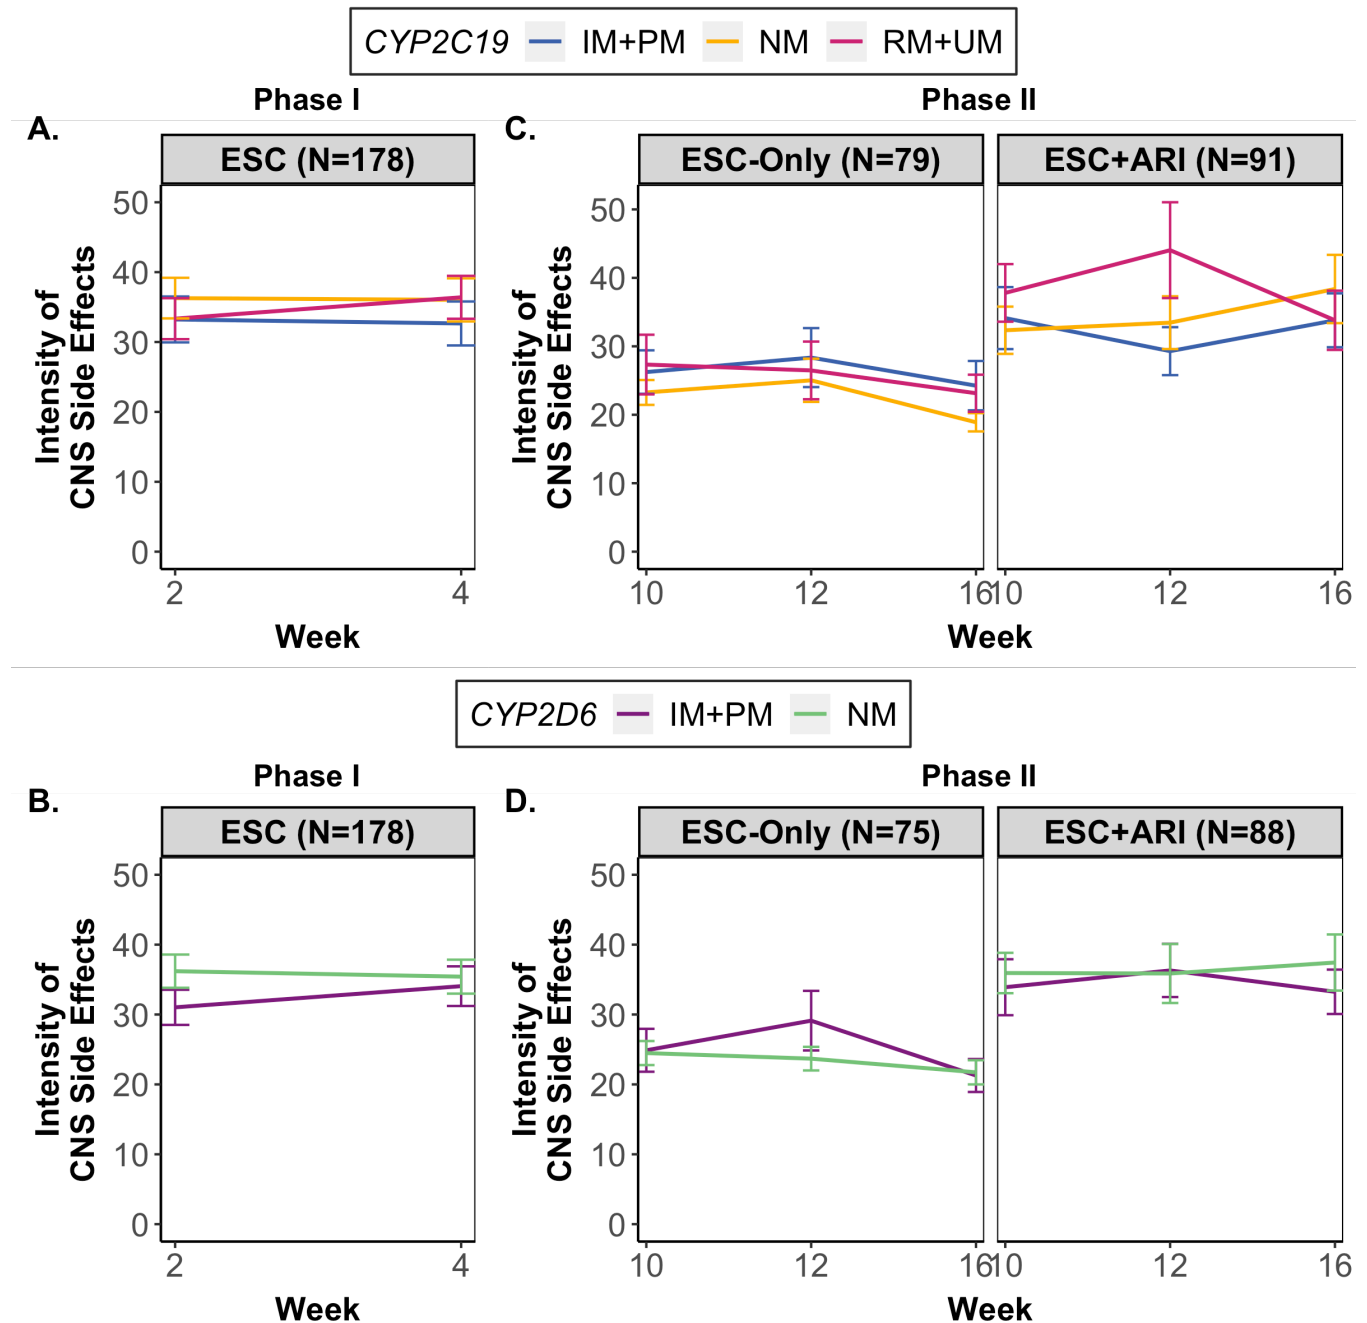

CNS side effect intensity was not associated with *CYP2C19* and *CYP2D6* metabolizer groups during Phases I and II. Error bars represent standard error.

ARI = Aripiprazole; IM = Intermediate Metabolizer; NM = Normal Metabolizer; PM = Poor Metabolizer; RM = Rapid Metabolizer; UM = Ultra-rapid Metabolizer.

**Figure S11.** Intensity of gastrointestinal side effects over time by *CYP2C19* and *CYP2D6* metabolizer group and treatment-arm.

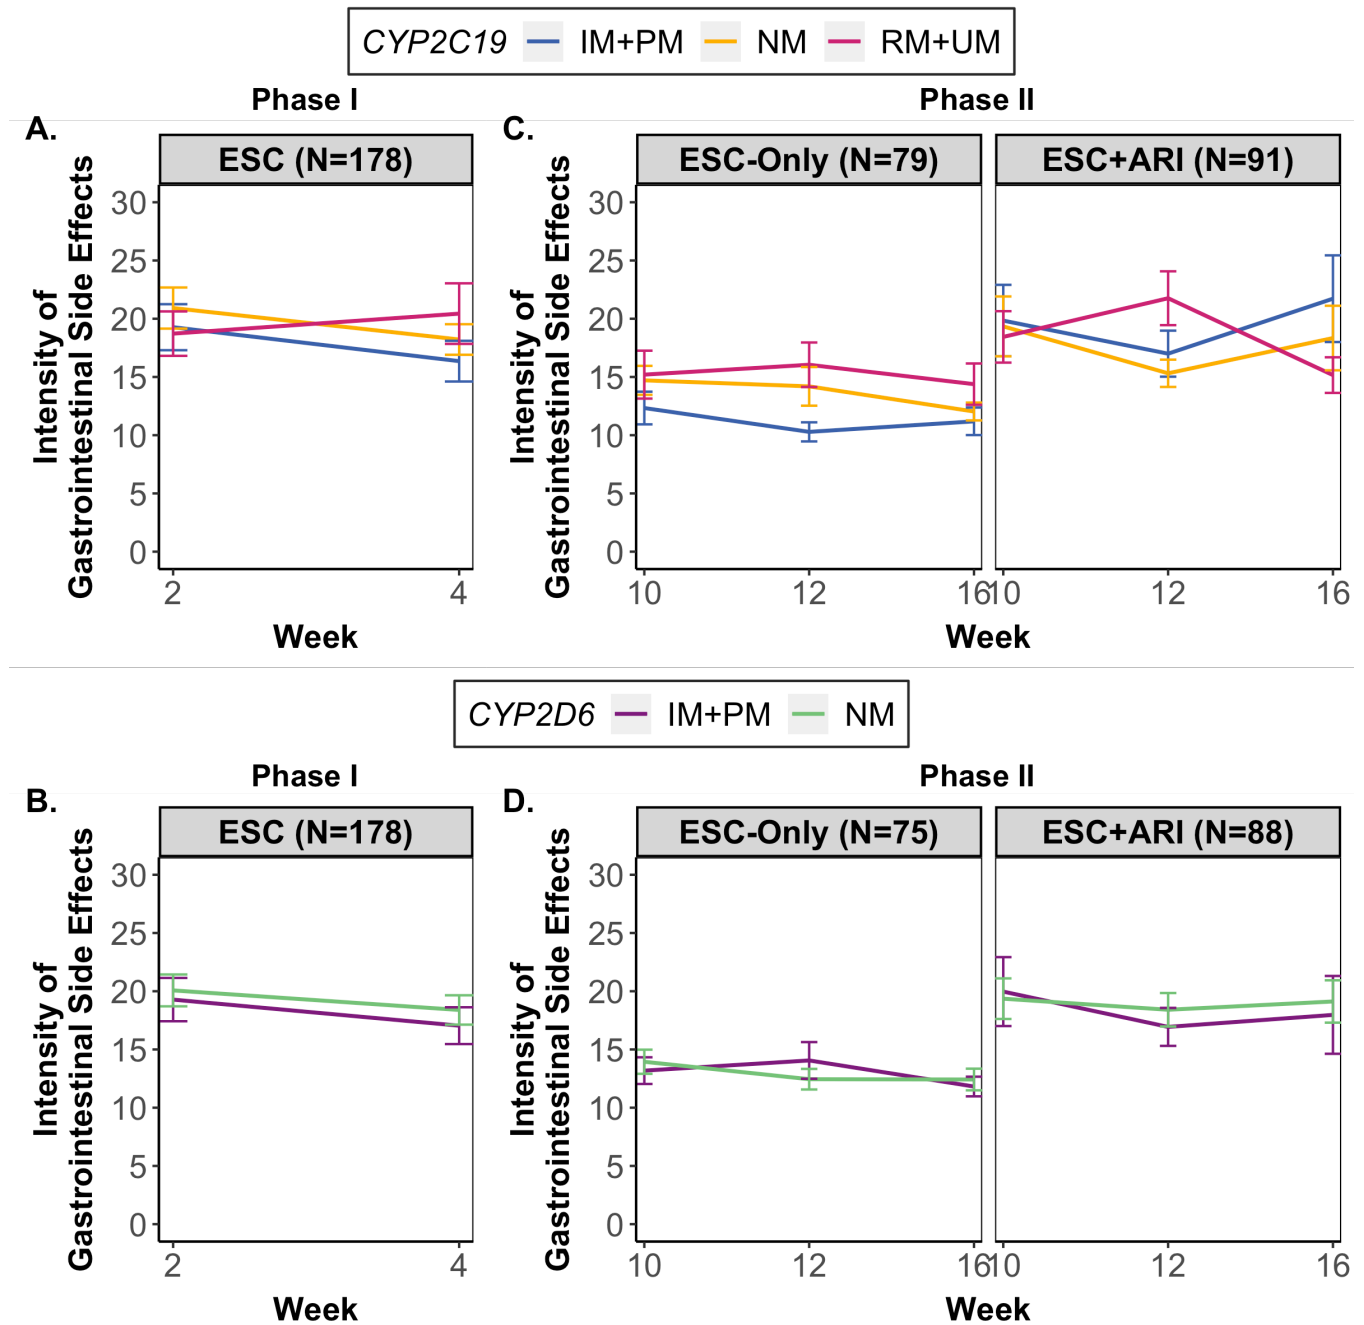

Gastrointestinal side effect intensity was not associated with *CYP2C19* and *CYP2D6* metabolizer groups during Phases I and II. Error bars represent standard error.

ARI = Aripiprazole; IM = Intermediate Metabolizer; NM = Normal Metabolizer; PM = Poor Metabolizer; RM = Rapid Metabolizer; UM = Ultra-rapid Metabolizer.

**Figure S12.** Intensity of sexual side effects over time by *CYP2C19* and *CYP2D6* metabolizer group and treatment-arm.

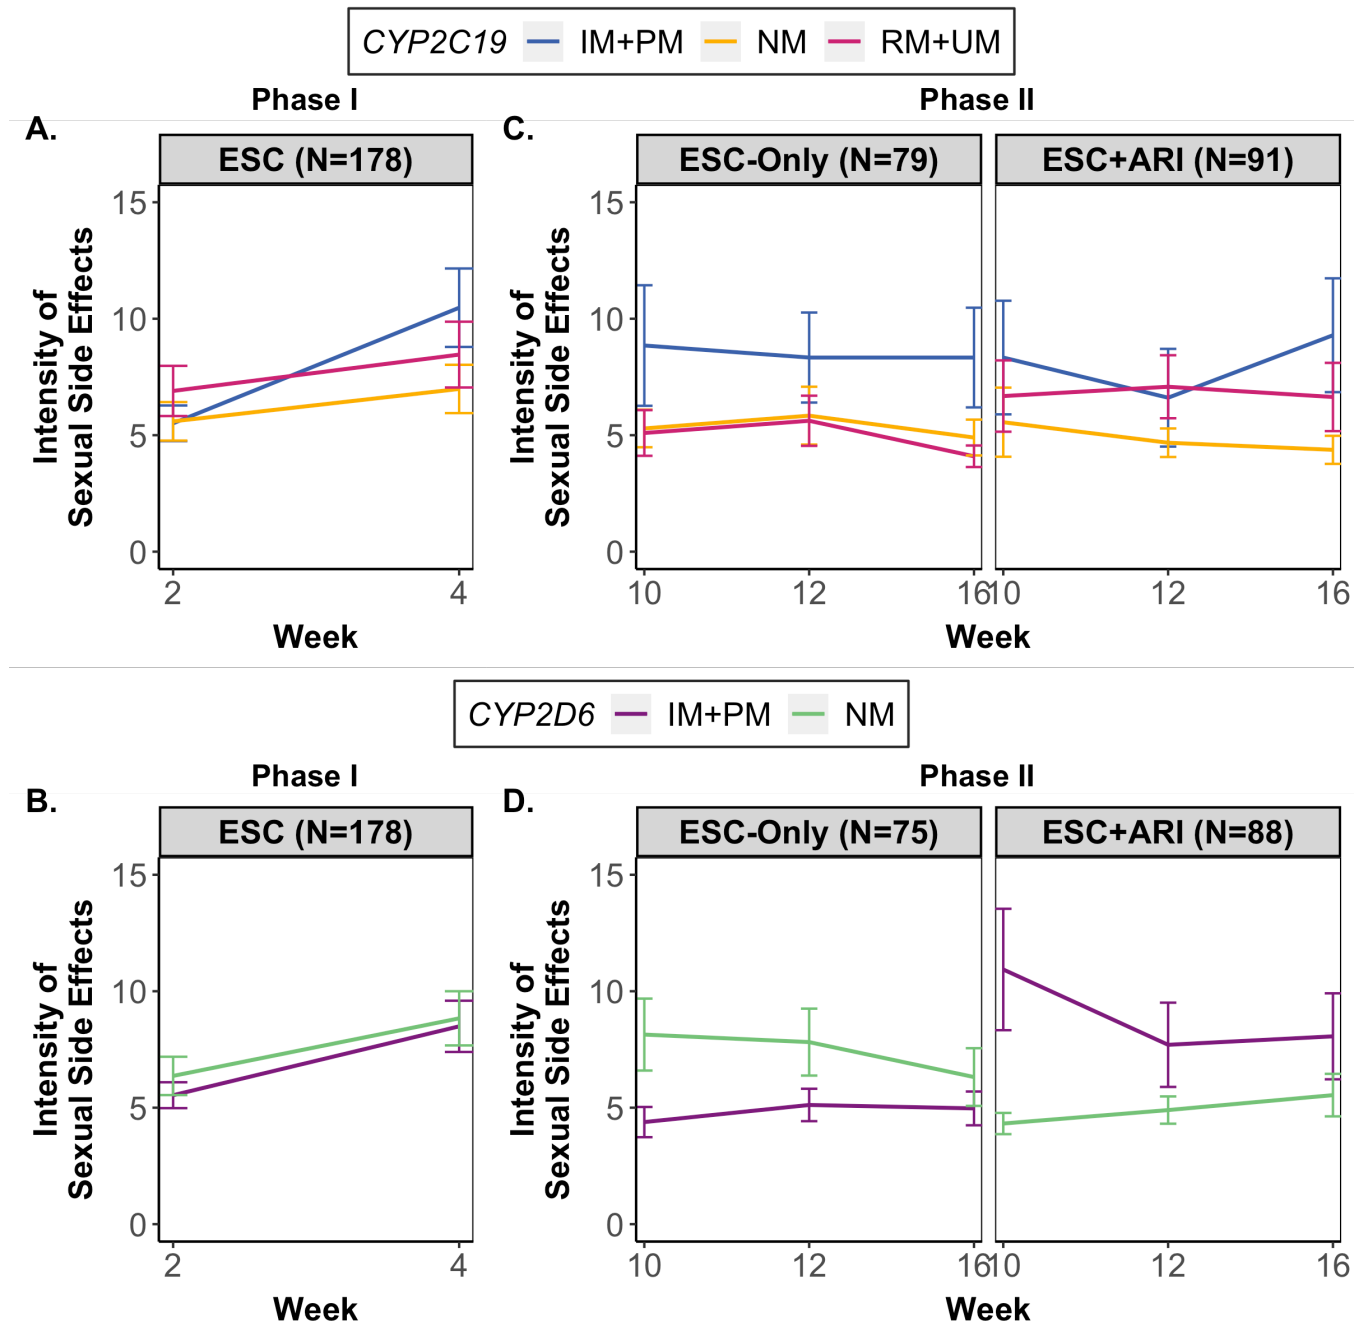

Sexual side effect intensity was not associated with *CYP2C19* and *CYP2D6* metabolizer groups during Phases I and II. Error bars represent standard error.

ARI = Aripiprazole; IM = Intermediate Metabolizer; NM = Normal Metabolizer; PM = Poor Metabolizer; RM = Rapid Metabolizer; UM = Ultra-rapid Metabolizer.

**Figure S13.** Intensity of treatment-related weight gain over time by *CYP2C19* and *CYP2D6* metabolizer group and treatment-arm.

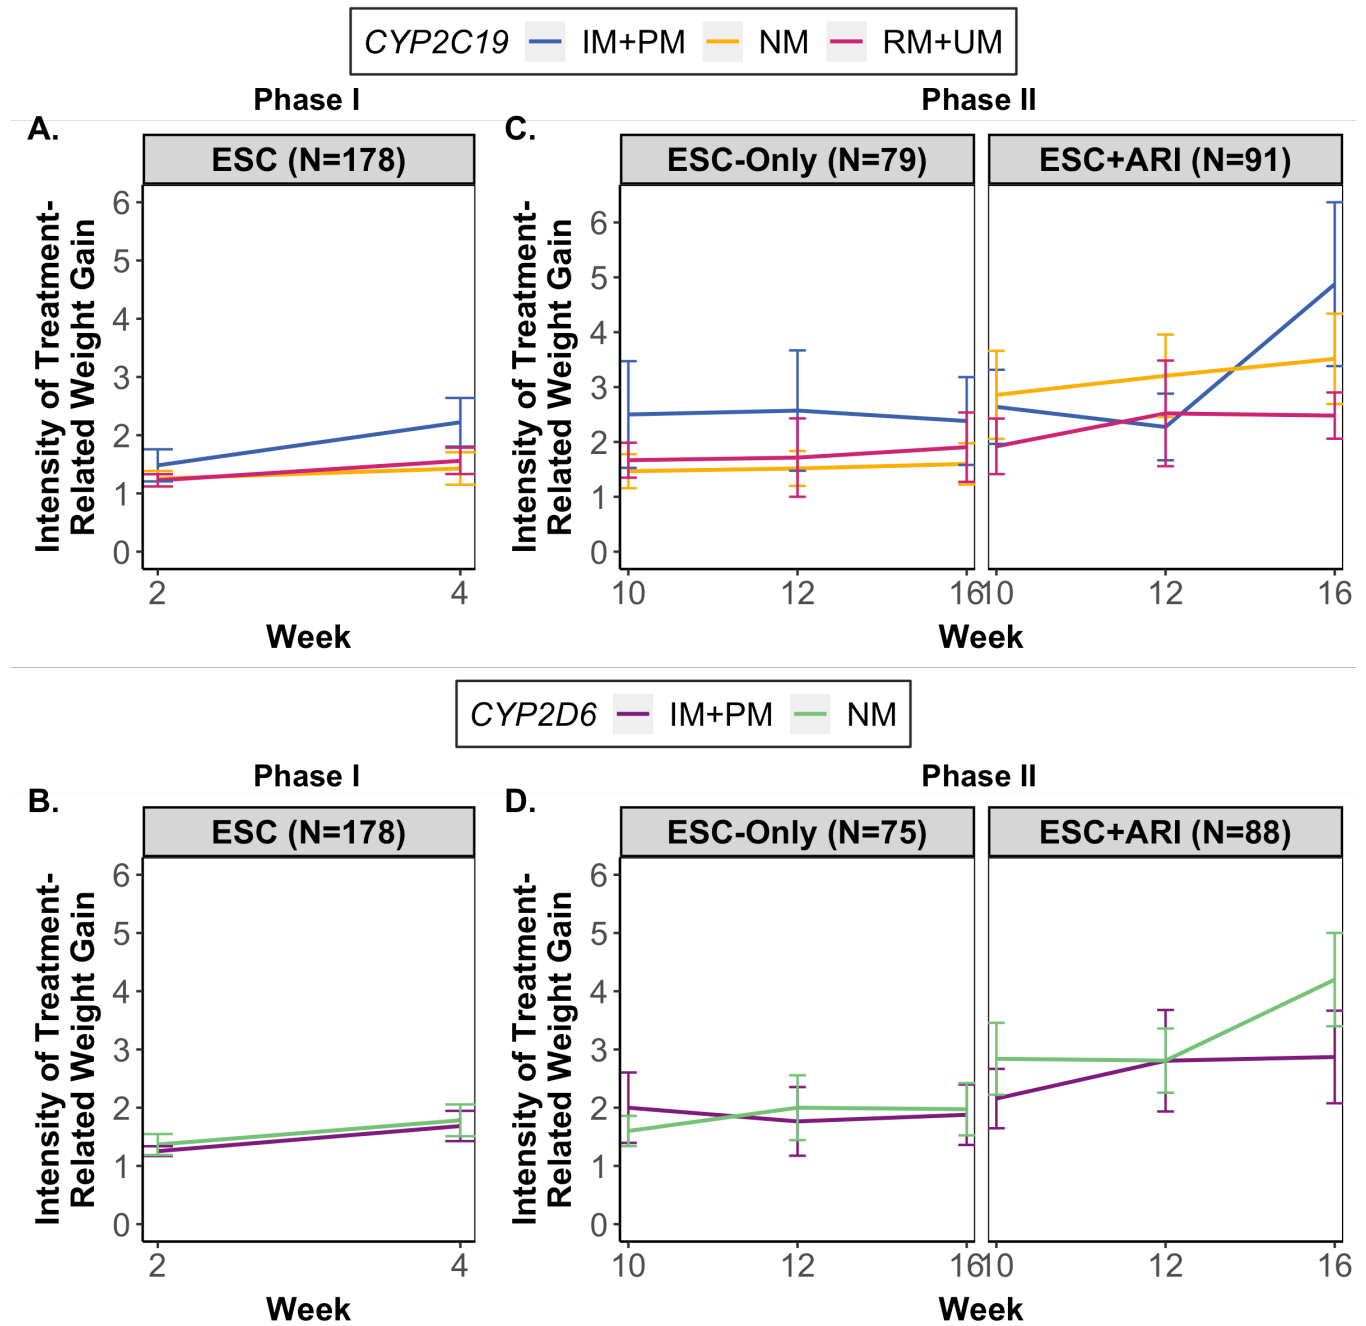

Treatment-related weight gain intensity was not associated with *CYP2C19* and *CYP2D6* metabolizer groups during Phases I and II. Error bars represent standard error.

ARI = Aripiprazole; IM = Intermediate Metabolizer; NM = Normal Metabolizer; PM = Poor Metabolizer; RM = Rapid Metabolizer; UM = Ultra-rapid Metabolizer.

**Table S10.** Summary of logistic regression models assessing associations of the presence or absence of subcategories of central nervous system side effects with CYP2D6 metabolizer groups for the ESC-Only treatment arm, adjusted for age, ancestry, sex, recruitment site, and total MADRS score at baseline.

| <i>Phase II: ESC-Only</i>   |                      |                      |                              |                    |                                             |
|-----------------------------|----------------------|----------------------|------------------------------|--------------------|---------------------------------------------|
| Fixed Effects               | Odds Ratios          | SE                   | CI (95%)                     | P-Value            | Summary                                     |
| <b>Agitation</b>            |                      |                      |                              |                    |                                             |
| <b>CYP2D6<br/>IM+PM</b>     | 2.38x10 <sup>3</sup> | 5.00x10 <sup>4</sup> | 0.00 – 1.93x10 <sup>21</sup> | 0.712              | N=71<br>R <sup>2</sup> =0.302<br>AIC=38.798 |
| <b>Blurred Vision</b>       |                      |                      |                              |                    |                                             |
| <b>CYP2D6<br/>IM+PM</b>     | 4.28                 | 9.32                 | 0.06 – 305.79                | 0.504              | N=71<br>R <sup>2</sup> =0.509<br>AIC=35.534 |
| <b>Decreased Sleepiness</b> |                      |                      |                              |                    |                                             |
| <b>CYP2D6<br/>IM+PM</b>     | 0.04 *               | 0.05                 | 0.00 – 0.50                  | <b>0.013<br/>*</b> | N=71<br>R <sup>2</sup> =0.600<br>AIC=61.002 |
| <b>Drowsiness</b>           |                      |                      |                              |                    |                                             |
| <b>CYP2D6<br/>IM+PM</b>     | 0.97                 | 0.59                 | 0.29 – 3.22                  | 0.961              | N=71<br>R <sup>2</sup> =0.212<br>AIC=95.386 |
| <b>Dizziness</b>            |                      |                      |                              |                    |                                             |
| <b>CYP2D6<br/>IM+PM</b>     | 0.00                 | 0.00                 | 0.00 – 1.03x10 <sup>47</sup> | 0.855              | N=70<br>R <sup>2</sup> =0.460<br>AIC=28.456 |
| <b>Flushing</b>             |                      |                      |                              |                    |                                             |
| <b>CYP2D6<br/>IM+PM</b>     | 0.68                 | 1.03                 | 0.04 – 13.13                 | 0.799              | N=71<br>R <sup>2</sup> =0.261<br>AIC=29.898 |
| <b>Headache</b>             |                      |                      |                              |                    |                                             |
| <b>CYP2D6<br/>IM+PM</b>     | 0.26                 | 0.28                 | 0.03 – 2.16                  | 0.213              | N=71<br>R <sup>2</sup> =0.405<br>AIC=65.612 |
| <b>Increased Sleepiness</b> |                      |                      |                              |                    |                                             |
| <b>CYP2D6<br/>IM+PM</b>     | 0.62                 | 0.66                 | 0.08 – 4.98                  | 0.653              | N=71<br>R <sup>2</sup> =0.551<br>AIC=57.711 |
| <b>Nervousness</b>          |                      |                      |                              |                    |                                             |



|                             |      |                      |                               |                    |                                             |
|-----------------------------|------|----------------------|-------------------------------|--------------------|---------------------------------------------|
| <b>CYP2D6<br/>IM+PM</b>     | 5.34 | 6.63                 | 0.47 – 60.81                  | 0.177              | N=71<br>R <sup>2</sup> =0.327<br>AIC=42.244 |
| <b>Postural Hypotension</b> |      |                      |                               |                    |                                             |
| <b>CYP2D6<br/>IM+PM</b>     | 6.55 | 8.98                 | 0.45 – 96.20                  | 0.170              | N=71<br>R <sup>2</sup> =0.510<br>AIC=46.021 |
| <b>Sweating</b>             |      |                      |                               |                    |                                             |
| <b>CYP2D6<br/>IM+PM</b>     | 0.03 | 0.05                 | 0.00 – 0.79                   | <b>0.035<br/>*</b> | N=71<br>R <sup>2</sup> =0.515<br>AIC=54.569 |
| <b>Tremor</b>               |      |                      |                               |                    |                                             |
| <b>CYP2D6<br/>IM+PM</b>     | 1.99 | 1.83x10 <sup>2</sup> | 0.00 – 1.25x10 <sup>79</sup>  | 0.994              | N=71<br>R <sup>2</sup> =1.00<br>AIC=26.002  |
| <b>Twitching myoclonus</b>  |      |                      |                               |                    |                                             |
| <b>CYP2D6<br/>IM+PM</b>     | 0.00 | 0.04                 | 0.00 – 6.36x10 <sup>142</sup> | 0.955              | N=71<br>R <sup>2</sup> =1.00<br>AIC=26.003  |
| <b>Weakness and Fatigue</b> |      |                      |                               |                    |                                             |
| <b>CYP2D6<br/>IM+PM</b>     | 0.26 | 0.24                 | 0.04 – 1.61                   | 0.147              | N=71<br>R <sup>2</sup> =0.275<br>AIC=71.935 |

AIC = Akaike information criterion; CI = confidence interval; ESC = Escitalopram; IM = Intermediate Metabolizer; NM = Normal Metabolizer; PM = Poor Metabolizer; RM = Rapid Metabolizer; SE = standard error; UM = Ultra-rapid Metabolizer.

\* $p < 0.05$

**Table S11.** Summary of logistic regression models assessing associations of the presence or absence of subcategories of sexual side effects with *CYP2D6* metabolizer groups for the ESC-ARI treatment arm, adjusted for age, ancestry, sex, recruitment site, and total MADRS score at baseline.

| <i>Phase II: ESC-Only</i> |             |      |                             |                     |                                             |
|---------------------------|-------------|------|-----------------------------|---------------------|---------------------------------------------|
| Fixed Effects             | Odds Ratios | SE   | CI (95%)                    | P-Value             | Summary                                     |
| <b>Anorgasmia</b>         |             |      |                             |                     |                                             |
| <b>CYP2D6<br/>IM+PM</b>   | 3.33        | 2.54 | 0.75 – 14.87                | 0.114               | N=81<br>R <sup>2</sup> =0.203<br>AIC=84.015 |
| <b>Decreased Libido</b>   |             |      |                             |                     |                                             |
| <b>CYP2D6<br/>IM+PM</b>   | 9.63 **     | 7.79 | 1.97 – 47.04                | <b>0.005<br/>**</b> | N=82<br>R <sup>2</sup> =0.370<br>AIC=93.730 |
| <b>Increased Libido</b>   |             |      |                             |                     |                                             |
| <b>CYP2D6<br/>IM+PM</b>   | 0.00        | 0.00 | 0.00 – 4.48x10 <sup>3</sup> | 0.321               | N=76<br>R <sup>2</sup> =0.745<br>AIC=31.278 |

AIC = Akaike information criterion; CI = confidence interval; ESC = Escitalopram; IM = Intermediate Metabolizer; NM = Normal Metabolizer; PM = Poor Metabolizer; RM = Rapid Metabolizer; SE = standard error; UM = Ultra-rapid Metabolizer.

\* $p < 0.05$

**Table S12.** Summary of linear mixed effects models assessing association between the intensity of central nervous system, gastrointestinal, and sexual side effects and treatment-related weight gain with every two-week assessment and *CYP2C19* and *CYP2D6* metabolizer groups over the course of Phase I and II, adjusted for age, ancestry, sex, and interaction between time and *CYP2C19* or *CYP2D6* as fixed effects, and site and subject as random effects variables.

| Fixed Effects                                    | Phase I                                                                |      |              |         |     | Phase II: ESC-Only                                                     |      |               |               |     | Phase II: ESC+ARI                                                      |      |               |               |     |
|--------------------------------------------------|------------------------------------------------------------------------|------|--------------|---------|-----|------------------------------------------------------------------------|------|---------------|---------------|-----|------------------------------------------------------------------------|------|---------------|---------------|-----|
|                                                  | Estimates                                                              | SE   | CI (95%)     | P-Value | df  | Estimates                                                              | SE   | CI (95%)      | P-Value       | df  | Estimates                                                              | SE   | CI (95%)      | P-Value       | df  |
| <b>Central Nervous System (CNS) Side Effects</b> |                                                                        |      |              |         |     |                                                                        |      |               |               |     |                                                                        |      |               |               |     |
| Week                                             | -0.03                                                                  | 0.04 | -0.10 – 0.04 | 0.398   | 164 | -0.03                                                                  | 0.01 | -0.05 – -0.01 | <b>0.013*</b> | 136 | 0.01                                                                   | 0.02 | -0.02 – 0.05  | 0.410         | 156 |
| CYP2C19 IM+PM                                    | -0.11                                                                  | 0.17 | -0.44 – 0.22 | 0.516   | 157 | -0.17                                                                  | 0.25 | -0.68 – 0.34  | 0.516         | 59  | 0.01                                                                   | 0.32 | -0.62 – 0.64  | 0.984         | 69  |
| CYP2C19 RM+UM                                    | -0.22                                                                  | 0.17 | -0.56 – 0.12 | 0.209   | 157 | -0.21                                                                  | 0.24 | -0.70 – 0.28  | 0.394         | 59  | 0.60                                                                   | 0.32 | -0.03 – 1.24  | 0.063         | 69  |
| CYP2D6 IM+PM                                     | -0.17                                                                  | 0.14 | -0.45 – 0.11 | 0.232   | 157 | 0.05                                                                   | 0.20 | -0.36 – 0.46  | 0.811         | 136 | 0.16                                                                   | 0.27 | -0.38 – 0.70  | 0.560         | 156 |
| CYP2C19 IM+PM*Week                               | 0.00                                                                   | 0.05 | -0.09 – 0.10 | 0.919   | 164 | 0.02                                                                   | 0.02 | -0.01 – 0.06  | 0.199         | 59  | -0.01                                                                  | 0.02 | -0.05 – 0.04  | 0.782         | 69  |
| CYP2C19 RM+UM*Week                               | 0.04                                                                   | 0.05 | -0.05 – 0.14 | 0.373   | 164 | 0.02                                                                   | 0.02 | -0.01 – 0.05  | 0.225         | 59  | -0.05                                                                  | 0.02 | -0.09 – -0.00 | <b>0.046*</b> | 69  |
| CYP2D6 IM+PM*Week                                | 0.05                                                                   | 0.04 | -0.03 – 0.13 | 0.207   | 164 | -0.01                                                                  | 0.01 | -0.04 – 0.02  | 0.555         | 136 | -0.00                                                                  | 0.02 | -0.04 – 0.04  | 0.944         | 156 |
| Model diagnostics                                | Observations = 338<br>Marginal R <sup>2</sup> = 0.103<br>AIC = 570.346 |      |              |         |     | Observations = 212<br>Marginal R <sup>2</sup> = 0.140<br>AIC = 248.271 |      |               |               |     | Observations = 242<br>Marginal R <sup>2</sup> = 0.142<br>AIC = 409.910 |      |               |               |     |
| <b>Gastrointestinal Side Effects</b>             |                                                                        |      |              |         |     |                                                                        |      |               |               |     |                                                                        |      |               |               |     |
| Week                                             | -0.04                                                                  | 0.04 | -0.11 – 0.03 | 0.232   | 163 | -0.43                                                                  | 0.19 | -0.82 – -0.05 | <b>0.029*</b> | 137 | -0.00                                                                  | 0.02 | -0.03 – 0.03  | 0.991         | 159 |

|                               |                                                                        |      |              |       |     |                                                                         |      |                |                   |     |                                                                        |      |              |       |     |
|-------------------------------|------------------------------------------------------------------------|------|--------------|-------|-----|-------------------------------------------------------------------------|------|----------------|-------------------|-----|------------------------------------------------------------------------|------|--------------|-------|-----|
| <b>CYP2C19<br/>IM+PM</b>      | -0.02                                                                  | 0.17 | -0.35 – 0.31 | 0.891 | 157 | -8.83                                                                   | 3.86 | -16.55 – -1.10 | <b>0.026</b><br>* | 59  | -0.33                                                                  | 0.32 | -0.98 – 0.31 | 0.307 | 69  |
| <b>CYP2C19<br/>RM+UM</b>      | -0.25                                                                  | 0.17 | -0.59 – 0.08 | 0.138 | 157 | -5.23                                                                   | 3.81 | -12.86 – 2.41  | 0.176             | 59  | 0.34                                                                   | 0.33 | -0.32 – 0.99 | 0.304 | 69  |
| <b>CYP2D6<br/>IM+PM</b>       | 0.01                                                                   | 0.14 | -0.27 – 0.29 | 0.942 | 157 | 1.77                                                                    | 3.15 | -4.54 – 8.07   | 0.577             | 59  | 0.33                                                                   | 0.28 | -0.23 – 0.89 | 0.240 | 69  |
| <b>CYP2C19<br/>IM+PM*Week</b> | -0.03                                                                  | 0.05 | -0.12 – 0.07 | 0.553 | 163 | 0.44                                                                    | 0.27 | -0.09 – 0.98   | 0.105             | 137 | 0.03                                                                   | 0.02 | -0.02 – 0.07 | 0.259 | 159 |
| <b>CYP2C19<br/>RM+UM*Week</b> | 0.05                                                                   | 0.05 | -0.04 – 0.15 | 0.268 | 163 | 0.43                                                                    | 0.27 | -0.12 – 0.97   | 0.124             | 137 | -0.03                                                                  | 0.02 | -0.07 – 0.02 | 0.265 | 159 |
| <b>CYP2D6<br/>IM+PM*Week</b>  | -0.01                                                                  | 0.04 | -0.09 – 0.07 | 0.853 | 163 | -0.13                                                                   | 0.23 | -0.58 – 0.32   | 0.582             | 137 | -0.03                                                                  | 0.02 | -0.07 – 0.01 | 0.192 | 159 |
| <b>Model<br/>diagnostics</b>  | Observations = 337<br>Marginal R <sup>2</sup> = 0.198<br>AIC = 548.974 |      |              |       |     | Observations = 213<br>Marginal R <sup>2</sup> = 0.171<br>AIC = 1337.590 |      |                |                   |     | Observations = 245<br>Marginal R <sup>2</sup> = 0.158<br>AIC = 420.968 |      |              |       |     |

**Sexual Side Effects**

|                               |       |      |              |       |     |       |      |                |                   |     |       |      |               |                    |     |
|-------------------------------|-------|------|--------------|-------|-----|-------|------|----------------|-------------------|-----|-------|------|---------------|--------------------|-----|
| <b>Week</b>                   | 0.06  | 0.05 | -0.04 – 0.16 | 0.220 | 158 | -0.25 | 0.19 | -0.62 – 0.12   | 0.184             | 137 | 0.02  | 0.27 | -0.51 – 0.55  | 0.940              | 155 |
| <b>CYP2C19<br/>IM+PM</b>      | -0.16 | 0.25 | -0.65 – 0.33 | 0.523 | 157 | 2.88  | 3.87 | -4.87 – 10.63  | 0.460             | 59  | -3.75 | 5.02 | -13.76 – 6.26 | 0.457              | 68  |
| <b>CYP2C19<br/>RM+UM</b>      | 0.13  | 0.25 | -0.36 – 0.62 | 0.598 | 157 | 1.72  | 3.73 | -5.75 – 9.19   | 0.647             | 59  | 0.01  | 5.01 | -9.98 – 10.00 | 0.999              | 68  |
| <b>CYP2D6<br/>IM+PM</b>       | 0.01  | 0.21 | -0.40 – 0.42 | 0.973 | 157 | -7.54 | 3.11 | -13.75 – -1.32 | <b>0.018</b><br>* | 59  | 12.19 | 4.32 | 3.58 – 20.80  | <b>0.006</b><br>** | 68  |
| <b>CYP2C19<br/>IM+PM*Week</b> | 0.12  | 0.07 | -0.02 – 0.26 | 0.090 | 158 | -0.01 | 0.26 | -0.53 – 0.51   | 0.976             | 137 | 0.49  | 0.37 | -0.25 – 1.22  | 0.192              | 155 |
| <b>CYP2C19<br/>RM+UM*Week</b> | 0.00  | 0.07 | -0.14 – 0.14 | 0.959 | 158 | -0.15 | 0.26 | -0.67 – 0.37   | 0.565             | 137 | 0.14  | 0.37 | -0.60 – 0.87  | 0.715              | 155 |
| <b>CYP2D6<br/>IM+PM*Week</b>  | 0.01  | 0.06 | -0.10 – 0.13 | 0.804 | 158 | 0.37  | 0.22 | -0.06 – 0.80   | 0.093             | 137 | -0.61 | 0.32 | -1.24 – 0.02  | 0.057              | 155 |

| Model diagnostics     | Observations = 332<br>Marginal R <sup>2</sup> = 0.116<br>AIC = 786.924  |      |              |       |     |       | Observations = 213<br>Marginal R <sup>2</sup> = 0.308<br>AIC = 1336.450 |              |       |     |       | Observations = 240<br>Marginal R <sup>2</sup> = 0.206<br>AIC = 1645.792 |               |       |     |
|-----------------------|-------------------------------------------------------------------------|------|--------------|-------|-----|-------|-------------------------------------------------------------------------|--------------|-------|-----|-------|-------------------------------------------------------------------------|---------------|-------|-----|
|                       | Treatment-Related Weight Gain                                           |      |              |       |     |       |                                                                         |              |       |     |       |                                                                         |               |       |     |
| Week                  | 0.10                                                                    | 0.19 | -0.28 – 0.48 | 0.605 | 162 | 0.01  | 0.08                                                                    | -0.15 – 0.18 | 0.885 | 136 | 0.18  | 0.18                                                                    | -0.17 – 0.53  | 0.320 | 155 |
| CYP2C19<br>IM+PM      | -0.48                                                                   | 0.84 | -2.13 – 1.17 | 0.566 | 157 | 0.99  | 1.74                                                                    | -2.50 – 4.48 | 0.573 | 59  | -3.77 | 3.19                                                                    | -10.13 – 2.58 | 0.240 | 69  |
| CYP2C19<br>RM+UM      | -0.24                                                                   | 0.86 | -1.94 – 1.46 | 0.782 | 157 | -0.55 | 1.68                                                                    | -3.91 – 2.80 | 0.742 | 59  | -0.87 | 3.20                                                                    | -7.26 – 5.52  | 0.787 | 69  |
| CYP2D6<br>IM+PM       | -0.03                                                                   | 0.71 | -1.43 – 1.38 | 0.971 | 157 | 0.53  | 1.40                                                                    | -2.26 – 3.33 | 0.703 | 59  | 1.66  | 2.74                                                                    | -3.80 – 7.12  | 0.545 | 69  |
| CYP2C19<br>IM+PM*Week | 0.32                                                                    | 0.26 | -0.21 – 0.84 | 0.234 | 162 | 0.02  | 0.12                                                                    | -0.21 – 0.25 | 0.849 | 136 | 0.29  | 0.24                                                                    | -0.19 – 0.78  | 0.228 | 155 |
| CYP2C19<br>RM+UM*Week | 0.08                                                                    | 0.27 | -0.45 – 0.62 | 0.764 | 162 | 0.06  | 0.12                                                                    | -0.17 – 0.29 | 0.615 | 136 | -0.05 | 0.24                                                                    | -0.53 – 0.44  | 0.848 | 155 |
| CYP2D6<br>IM+PM*Week  | -0.02                                                                   | 0.23 | -0.47 – 0.42 | 0.916 | 162 | -0.06 | 0.10                                                                    | -0.25 – 0.14 | 0.567 | 136 | -0.17 | 0.21                                                                    | -0.58 – 0.24  | 0.421 | 155 |
| Model diagnostics     | Observations = 336<br>Marginal R <sup>2</sup> = 0.047<br>AIC = 1473.695 |      |              |       |     |       | Observations = 212<br>Marginal R <sup>2</sup> = 0.078<br>AIC = 1012.255 |              |       |     |       | Observations = 241<br>Marginal R <sup>2</sup> = 0.120<br>AIC = 1414.287 |               |       |     |

AIC = Akaike information criterion; ARI = Aripiprazole; CI = confidence interval; ESC = Escitalopram; IM = Intermediate Metabolizer; NM = Normal Metabolizer; PM = Poor Metabolizer; RM = Rapid Metabolizer; SE = standard error; UM = Ultra-rapid Metabolizer.

\* $p < 0.05$ , \*\*  $p < 0.01$ , \*\*\*  $p < 0.001$ .

**Table S13.** Summary of logistic regression models assessing associations of the presence or absence of central nervous system, gastrointestinal, and sexual side effects, and treatment-related weight changes with CYP2C19 and CYP2D6 metabolizer groups during Phase I and II for the European subset, adjusted for age, ancestry, site, and sex.

| Fixed Effects                                    | Phase I     |      |              |         |                                               | Phase II: ESC-Only |      |              |              |                                             | Phase II: ESC+ARI |      |              |                   |                                             |
|--------------------------------------------------|-------------|------|--------------|---------|-----------------------------------------------|--------------------|------|--------------|--------------|---------------------------------------------|-------------------|------|--------------|-------------------|---------------------------------------------|
|                                                  | Odds Ratios | SE   | CI (95%)     | P-Value | Summary                                       | Odds Ratios        | SE   | CI (95%)     | P-Value      | Summary                                     | Odds Ratios       | SE   | CI (95%)     | P-Value           | Summary                                     |
| <b>Central Nervous System (CNS) Side Effects</b> |             |      |              |         |                                               |                    |      |              |              |                                             |                   |      |              |                   |                                             |
| <b>CYP2C19 IM+PM</b>                             | 1.48        | 0.88 | 0.46 – 4.74  | 0.509   |                                               | 0.34               | 0.34 | 0.05 – 2.40  | 0.279        |                                             | 1.44              | 1.30 | 0.25 – 8.39  | 0.685             |                                             |
| <b>CYP2C19 RM+UM</b>                             | 2.10        | 1.16 | 0.71 – 6.23  | 0.180   | N=125<br>R <sup>2</sup> =0.251<br>AIC=132.489 | 1.46               | 1.29 | 0.26 – 8.28  | 0.666        | N=53<br>R <sup>2</sup> =0.540<br>AIC=67.615 | 3.92              | 3.92 | 0.55 – 27.80 | 0.171             | N=63<br>R <sup>2</sup> =0.441<br>AIC=67.346 |
| <b>CYP2D6 IM+PM</b>                              | 0.66        | 0.31 | 0.26 – 1.68  | 0.384   |                                               | 0.13               | 0.13 | 0.02 – 0.91  | <b>0.040</b> |                                             | 7.62              | 7.24 | 1.18 – 49.14 | <b>0.033</b>      |                                             |
| <b>Gastrointestinal Side Effects</b>             |             |      |              |         |                                               |                    |      |              |              |                                             |                   |      |              |                   |                                             |
| <b>CYP2C19 IM+PM</b>                             | 0.84        | 0.43 | 0.31 – 2.26  | 0.724   |                                               | 0.09               | 0.11 | 0.01 – 1.06  | 0.056        |                                             | 1.24              | 0.92 | 0.29 – 5.29  | 0.771             |                                             |
| <b>CYP2C19 RM+UM</b>                             | 1.51        | 0.74 | 0.58 – 3.93  | 0.395   | N=124<br>R <sup>2</sup> =0.148<br>AIC=162.568 | 0.47               | 0.36 | 0.11 – 2.07  | 0.321        | N=53<br>R <sup>2</sup> =0.341<br>AIC=78.475 | 1.43              | 1.01 | 0.36 – 5.70  | 0.612             | N=63<br>R <sup>2</sup> =0.250<br>AIC=92.960 |
| <b>CYP2D6 IM+PM</b>                              | 0.90        | 0.37 | 0.40 – 2.03  | 0.791   |                                               | 1.32               | 0.91 | 0.34 – 5.12  | 0.693        |                                             | 0.61              | 0.39 | 0.18 – 2.12  | 0.439             |                                             |
| <b>Sexual Side Effects</b>                       |             |      |              |         |                                               |                    |      |              |              |                                             |                   |      |              |                   |                                             |
| <b>CYP2C19 IM+PM</b>                             | 1.91        | 0.93 | 0.73 – 4.98  | 0.185   |                                               | 1.88               | 1.73 | 0.31 – 11.47 | 0.495        |                                             | 5.30              | 4.37 | 1.06 – 26.65 | <b>0.043</b><br>* |                                             |
| <b>CYP2C19 RM+UM</b>                             | 1.84        | 0.81 | 0.77 – 4.38  | 0.171   | N=125<br>R <sup>2</sup> =0.097<br>AIC=180.980 | 1.31               | 1.01 | 0.29 – 5.91  | 0.729        | N=53<br>R <sup>2</sup> =0.169<br>AIC=78.528 | 3.55              | 2.70 | 0.80 – 15.75 | 0.095             | N=63<br>R <sup>2</sup> =0.260<br>AIC=89.149 |
| <b>CYP2D6 IM+PM</b>                              | 1.98        | 0.76 | 0.93 – 4.22  | 0.077   |                                               | 0.62               | 0.42 | 0.17 – 2.35  | 0.485        |                                             | 2.62              | 1.69 | 0.74 – 9.28  | 0.135             |                                             |
| <b>Treatment-Related Weight Gain</b>             |             |      |              |         |                                               |                    |      |              |              |                                             |                   |      |              |                   |                                             |
| <b>CYP2C19 IM+PM</b>                             | 2.56        | 1.90 | 0.60 – 10.95 | 0.204   | N=125<br>R <sup>2</sup> =0.139                | 3.89               | 4.80 | 0.35 – 43.75 | 0.271        | N=53<br>R <sup>2</sup> =0.373               | 0.57              | 0.41 | 0.14 – 2.36  | 0.438             | N=62<br>R <sup>2</sup> =0.169               |

|                          |      |      |             |       |             |      |      |             |       |                |      |      |             |       |            |
|--------------------------|------|------|-------------|-------|-------------|------|------|-------------|-------|----------------|------|------|-------------|-------|------------|
| <b>CYP2C19<br/>RM+UM</b> | 1.60 | 1.17 | 0.38 – 6.75 | 0.522 | AIC=100.622 | 0.46 | 0.60 | 0.03 – 6.04 | 0.553 | AIC=48.32<br>9 | 1.00 | 0.67 | 0.27 – 3.68 | 0.998 | AIC=98.021 |
| <b>CYP2D6<br/>IM+PM</b>  | 0.81 | 0.50 | 0.24 – 2.70 | 0.728 |             | 0.82 | 0.99 | 0.08 – 8.72 | 0.871 |                | 0.65 | 0.39 | 0.20 – 2.11 | 0.470 |            |

AIC = Akaike information criterion; ARI = Aripiprazole; CI = confidence interval; ESC = Escitalopram; IM = Intermediate Metabolizer; NM = Normal Metabolizer; PM = Poor Metabolizer; RM = Rapid Metabolizer; SE = standard error; UM = Ultra-rapid Metabolizer.

\* $p < 0.05$ , \*\* $p < 0.01$ , \*\*\* $p < 0.001$ .

**Table S14.** Summary of linear mixed effects models assessing association between the intensity of central nervous system, gastrointestinal, and sexual side effects and treatment-related weight gain with every two-week assessment and CYP2C19 and CYP2D6 metabolizer groups over the course of Phase I and II for the European subset, adjusted for age, ancestry, sex, and interaction between time and CYP2C19 or CYP2D6 as fixed effects, and site and subject as random effects variables.

| Fixed Effects                                    | Phase I                                                                |      |              |         |     | Phase II: ESC-Only                                                     |      |               |               |     | Phase II: ESC+ARI                                                      |      |              |         |     |
|--------------------------------------------------|------------------------------------------------------------------------|------|--------------|---------|-----|------------------------------------------------------------------------|------|---------------|---------------|-----|------------------------------------------------------------------------|------|--------------|---------|-----|
|                                                  | Estimates                                                              | SE   | CI (95%)     | P-Value | df  | Estimates                                                              | SE   | CI (95%)      | P-Value       | df  | Estimates                                                              | SE   | CI (95%)     | P-Value | df  |
| <b>Central Nervous System (CNS) Side Effects</b> |                                                                        |      |              |         |     |                                                                        |      |               |               |     |                                                                        |      |              |         |     |
| Week                                             | -0.04                                                                  | 0.04 | -0.12 – 0.05 | 0.398   | 120 | -0.03                                                                  | 0.01 | -0.06 – -0.01 | <b>0.018*</b> | 103 | 0.01                                                                   | 0.02 | -0.03 – 0.05 | 0.716   | 119 |
| CYP2C19 IM+PM                                    | -0.15                                                                  | 0.22 | -0.60 – 0.29 | 0.493   | 115 | -0.16                                                                  | 0.34 | -0.84 – 0.52  | 0.638         | 43  | -0.06                                                                  | 0.40 | -0.85 – 0.73 | 0.881   | 52  |
| CYP2C19 RM+UM                                    | -0.25                                                                  | 0.20 | -0.64 – 0.15 | 0.218   | 115 | -0.41                                                                  | 0.26 | -0.92 – 0.11  | 0.121         | 43  | 0.46                                                                   | 0.38 | -0.29 – 1.21 | 0.228   | 52  |
| CYP2D6 IM+PM                                     | -0.09                                                                  | 0.18 | -0.44 – 0.26 | 0.616   | 115 | 0.09                                                                   | 0.23 | -0.38 – 0.55  | 0.711         | 43  | 0.30                                                                   | 0.33 | -0.37 – 0.97 | 0.376   | 52  |
| CYP2C19 IM+PM*Week                               | 0.02                                                                   | 0.06 | -0.11 – 0.14 | 0.775   | 115 | 0.02                                                                   | 0.02 | -0.03 – 0.07  | 0.371         | 43  | -0.01                                                                  | 0.03 | -0.06 – 0.05 | 0.813   | 52  |
| CYP2C19 RM+UM*Week                               | 0.06                                                                   | 0.06 | -0.05 – 0.17 | 0.289   | 120 | 0.03                                                                   | 0.02 | -0.00 – 0.07  | 0.053         | 103 | -0.04                                                                  | 0.03 | -0.09 – 0.02 | 0.194   | 119 |
| CYP2D6 IM+PM*Week                                | 0.01                                                                   | 0.05 | -0.09 – 0.11 | 0.784   | 120 | -0.01                                                                  | 0.02 | -0.04 – 0.02  | 0.536         | 103 | -0.01                                                                  | 0.02 | -0.06 – 0.04 | 0.637   | 119 |
| Model diagnostics                                | Observations = 250<br>Marginal R <sup>2</sup> = 0.058<br>AIC = 455.247 |      |              |         |     | Observations = 161<br>Marginal R <sup>2</sup> = 0.179<br>AIC = 190.247 |      |               |               |     | Observations = 186<br>Marginal R <sup>2</sup> = 0.084<br>AIC = 338.843 |      |              |         |     |
| <b>Gastrointestinal Side Effects</b>             |                                                                        |      |              |         |     |                                                                        |      |               |               |     |                                                                        |      |              |         |     |
| Week                                             | -0.07                                                                  | 0.04 | -0.15 – 0.01 | 0.090   | 120 | -0.43                                                                  | 0.22 | -0.86 – -0.00 | <b>0.050</b>  | 102 | -0.00                                                                  | 0.02 | -0.04 – 0.04 | 0.995   | 121 |



|                               |                                                                        |      |              |       |     |                                                                        |      |                |                   |     |                                                                        |      |              |       |     |
|-------------------------------|------------------------------------------------------------------------|------|--------------|-------|-----|------------------------------------------------------------------------|------|----------------|-------------------|-----|------------------------------------------------------------------------|------|--------------|-------|-----|
| <b>CYP2C19<br/>IM+PM</b>      | -0.12                                                                  | 0.21 | -0.53 – 0.30 | 0.582 | 115 | -7.44                                                                  | 5.20 | -17.92 – 3.04  | 0.160             | 43  | -0.36                                                                  | 0.40 | -1.17 – 0.45 | 0.376 | 52  |
| <b>CYP2C19<br/>RM+UM</b>      | -0.30                                                                  | 0.19 | -0.68 – 0.07 | 0.109 | 115 | -8.96                                                                  | 3.98 | -16.99 – -0.93 | <b>0.030</b><br>* | 43  | 0.27                                                                   | 0.38 | -0.50 – 1.03 | 0.490 | 52  |
| <b>CYP2D6<br/>IM+PM</b>       | -0.03                                                                  | 0.17 | -0.36 – 0.30 | 0.871 | 115 | 4.12                                                                   | 3.57 | -3.08 – 11.32  | 0.255             | 43  | 0.48                                                                   | 0.34 | -0.21 – 1.16 | 0.169 | 52  |
| <b>CYP2C19<br/>IM+PM*Week</b> | 0.00                                                                   | 0.06 | -0.12 – 0.12 | 0.995 | 115 | 0.25                                                                   | 0.38 | -0.51 – 1.00   | 0.517             | 43  | 0.03                                                                   | 0.03 | -0.03 – 0.09 | 0.297 | 52  |
| <b>CYP2C19<br/>RM+UM*Week</b> | 0.08                                                                   | 0.05 | -0.03 – 0.18 | 0.147 | 120 | 0.60 *                                                                 | 0.29 | 0.02 – 1.17    | <b>0.042</b><br>* | 102 | -0.02                                                                  | 0.03 | -0.08 – 0.03 | 0.459 | 121 |
| <b>CYP2D6<br/>IM+PM*Week</b>  | -0.02                                                                  | 0.05 | -0.11 – 0.08 | 0.714 | 120 | -0.24                                                                  | 0.26 | -0.75 – 0.28   | 0.370             | 102 | -0.03                                                                  | 0.03 | -0.08 – 0.02 | 0.189 | 121 |
| <b>Model<br/>diagnostics</b>  | Observations = 250<br>Marginal R <sup>2</sup> = 0.126<br>AIC = 424.021 |      |              |       |     | Observations = 160<br>Marginal R <sup>2</sup> = 0.220<br>AIC = 998.795 |      |                |                   |     | Observations = 188<br>Marginal R <sup>2</sup> = 0.153<br>AIC = 339.012 |      |              |       |     |

**Sexual Side Effects**

|                               |       |      |              |       |     |       |      |               |       |     |            |      |                |                   |     |
|-------------------------------|-------|------|--------------|-------|-----|-------|------|---------------|-------|-----|------------|------|----------------|-------------------|-----|
| <b>Week</b>                   | 0.04  | 0.06 | -0.08 – 0.16 | 0.546 | 117 | -0.17 | 0.18 | -0.53 – 0.19  | 0.351 | 103 | 0.13       | 0.30 | -0.47 – 0.72   | 0.680             | 121 |
| <b>CYP2C19<br/>IM+PM</b>      | -0.25 | 0.33 | -0.90 – 0.40 | 0.448 | 115 | -3.69 | 4.42 | -12.60 – 5.22 | 0.408 | 43  | -1.99      | 5.92 | -13.86 – 9.88  | 0.738             | 52  |
| <b>CYP2C19<br/>RM+UM</b>      | 0.05  | 0.29 | -0.51 – 0.62 | 0.854 | 115 | 0.92  | 3.36 | -5.84 – 7.69  | 0.785 | 43  | 0.74       | 5.62 | -10.53 – 12.01 | 0.896             | 52  |
| <b>CYP2D6<br/>IM+PM</b>       | 0.05  | 0.26 | -0.46 – 0.55 | 0.858 | 115 | -3.12 | 3.01 | -9.20 – 2.96  | 0.307 | 43  | 12.03<br>* | 5.01 | 1.99 – 22.08   | <b>0.020</b><br>* | 52  |
| <b>CYP2C19<br/>IM+PM*Week</b> | 0.17  | 0.09 | -0.01 – 0.35 | 0.070 | 115 | 0.33  | 0.32 | -0.30 – 0.96  | 0.301 | 43  | 0.43       | 0.44 | -0.43 – 1.29   | 0.325             | 52  |
| <b>CYP2C19<br/>RM+UM*Week</b> | 0.02  | 0.08 | -0.14 – 0.18 | 0.774 | 117 | -0.10 | 0.24 | -0.58 – 0.37  | 0.672 | 103 | 0.10       | 0.41 | -0.72 – 0.92   | 0.817             | 121 |

|                                      |                                                                         |      |              |       |     |                                                                        |      |              |       |     |                                                                         |      |               |       |     |
|--------------------------------------|-------------------------------------------------------------------------|------|--------------|-------|-----|------------------------------------------------------------------------|------|--------------|-------|-----|-------------------------------------------------------------------------|------|---------------|-------|-----|
| <b>CYP2D6<br/>IM+PM*Week</b>         | 0.03                                                                    | 0.07 | -0.11 – 0.18 | 0.659 | 117 | 0.14                                                                   | 0.22 | -0.29 – 0.57 | 0.518 | 103 | -0.61                                                                   | 0.37 | -1.34 – 0.12  | 0.103 | 121 |
| <b>Model<br/>diagnostics</b>         | Observations = 247<br>Marginal R <sup>2</sup> = 0.106<br>AIC = 611.202  |      |              |       |     | Observations = 161<br>Marginal R <sup>2</sup> = 0.066<br>AIC = 956.098 |      |              |       |     | Observations = 188<br>Marginal R <sup>2</sup> = 0.239<br>AIC = 1294.973 |      |               |       |     |
| <b>Treatment-Related Weight Gain</b> |                                                                         |      |              |       |     |                                                                        |      |              |       |     |                                                                         |      |               |       |     |
| <b>Week</b>                          | 0.16                                                                    | 0.21 | -0.25 – 0.56 | 0.446 | 120 | -0.00                                                                  | 0.10 | -0.19 – 0.19 | 0.993 | 102 | 0.16                                                                    | 0.22 | -0.27 – 0.60  | 0.460 | 117 |
| <b>CYP2C19<br/>IM+PM</b>             | -1.21                                                                   | 0.99 | -3.18 – 0.76 | 0.226 | 115 | 3.24                                                                   | 2.35 | -1.50 – 7.97 | 0.175 | 43  | -4.55                                                                   | 4.16 | -12.90 – 3.81 | 0.280 | 52  |
| <b>CYP2C19<br/>RM+UM</b>             | -0.31                                                                   | 0.89 | -2.08 – 1.46 | 0.732 | 115 | -0.83                                                                  | 1.79 | -4.43 – 2.77 | 0.645 | 43  | -0.79                                                                   | 3.92 | -8.66 – 7.08  | 0.841 | 52  |
| <b>CYP2D6<br/>IM+PM</b>              | 0.30                                                                    | 0.79 | -1.26 – 1.87 | 0.700 | 115 | 0.51                                                                   | 1.61 | -2.73 – 3.75 | 0.754 | 43  | 0.95                                                                    | 3.52 | -6.11 – 8.02  | 0.787 | 52  |
| <b>CYP2C19<br/>IM+PM*Week</b>        | 0.50                                                                    | 0.31 | -0.12 – 1.12 | 0.115 | 115 | -0.06                                                                  | 0.17 | -0.39 – 0.27 | 0.717 | 43  | 0.33                                                                    | 0.32 | -0.30 – 0.96  | 0.302 | 52  |
| <b>CYP2C19<br/>RM+UM*Week</b>        | 0.07                                                                    | 0.28 | -0.49 – 0.63 | 0.805 | 120 | 0.02                                                                   | 0.13 | -0.23 – 0.27 | 0.881 | 102 | -0.07                                                                   | 0.30 | -0.66 – 0.53  | 0.828 | 117 |
| <b>CYP2D6<br/>IM+PM*Week</b>         | -0.12                                                                   | 0.25 | -0.61 – 0.38 | 0.641 | 120 | -0.02                                                                  | 0.11 | -0.25 – 0.21 | 0.860 | 102 | -0.09                                                                   | 0.27 | -0.62 – 0.45  | 0.746 | 117 |
| <b>Model<br/>diagnostics</b>         | Observations = 250<br>Marginal R <sup>2</sup> = 0.055<br>AIC = 1075.204 |      |              |       |     | Observations = 160<br>Marginal R <sup>2</sup> = 0.302<br>AIC = 764.137 |      |              |       |     | Observations = 184<br>Marginal R <sup>2</sup> = 0.113<br>AIC = 1111.061 |      |               |       |     |

AIC = Akaike information criterion; ARI = Aripiprazole; CI = confidence interval; ESC = Escitalopram; IM = Intermediate Metabolizer; NM = Normal Metabolizer; PM = Poor Metabolizer; RM = Rapid Metabolizer; SE = standard error; UM = Ultra-rapid Metabolizer.

\* $p < 0.05$ , \*\* $p < 0.01$ , \*\*\* $p < 0.001$ .

**Table S15.** Summary of linear regression models assessing associations of dose-adjusted serum concentrations of ESC, S-DCT, and S-DCT/ESC ratio at Weeks 2, 10 and 16 with *CYP2C19* and *CYP2D6* metabolizer groups, adjusted for age, ancestry, sex, and recruitment site.

| Fixed Effects                                               | Week 2        |      |               |                         | Week 10: ESC-Only |      |               |                         | Week 10: ESC+ARI |      |               |                    | Week 16: ESC-Only |      |               |                         | Week 16: ESC+ARI |      |               |                         |
|-------------------------------------------------------------|---------------|------|---------------|-------------------------|-------------------|------|---------------|-------------------------|------------------|------|---------------|--------------------|-------------------|------|---------------|-------------------------|------------------|------|---------------|-------------------------|
|                                                             | B             | SE   | CI (95%)      | P-Value                 | B                 | SE   | CI (95%)      | P-Value                 | B                | SE   | CI (95%)      | P-Value            | B                 | SE   | CI (95%)      | P-Value                 | B                | SE   | CI (95%)      | P-Value                 |
| <b>ESC<sub>adj</sub> concentrations in serum</b>            |               |      |               |                         |                   |      |               |                         |                  |      |               |                    |                   |      |               |                         |                  |      |               |                         |
| <b>CYP2C19 IM+PM</b>                                        | 0.59          | 0.14 | 0.30 – 0.87   | <b>&lt;0.001</b><br>*** | 0.65              | 0.26 | 0.14 – 1.17   | <b>0.014</b><br>*       | 0.69             | 0.22 | 0.24 – 1.13   | <b>0.003</b><br>** | 0.66              | 0.26 | 0.13 – 1.19   | <b>0.016</b><br>*       | 0.77             | 0.20 | 0.37 – 1.17   | <b>&lt;0.001</b><br>*** |
| <b>CYP2C19 RM+UM</b>                                        | -0.05         | 0.14 | -0.33 – -0.23 | 0.703                   | 0.14              | 0.23 | -0.33 – -0.60 | 0.559                   | 0.01             | 0.23 | -0.45 – -0.47 | 0.980              | -0.10             | 0.23 | -0.57 – -0.37 | 0.666                   | 0.17             | 0.21 | -0.24 – -0.58 | 0.413                   |
| <b>CYP2D6 IM+PM</b>                                         | 0.31          | 0.12 | 0.07 – 0.54   | <b>0.012</b><br>*       | 0.71              | 0.19 | 0.34 – 1.09   | <b>&lt;0.001</b><br>*** | -0.37            | 0.20 | -0.77 – -0.03 | 0.071              | 0.75              | 0.20 | 0.35 – 1.15   | <b>&lt;0.001</b><br>*** | -0.32            | 0.18 | -0.67 – -0.04 | 0.085                   |
| n                                                           | 160           |      |               |                         | 66                |      |               |                         | 77               |      |               |                    | 67                |      |               |                         | 74               |      |               |                         |
| R <sup>2</sup> / R <sup>2</sup> adj                         | 0.331 / 0.276 |      |               |                         | 0.478 / 0.360     |      |               |                         | 0.284 / 0.150    |      |               |                    | 0.518 / 0.411     |      |               |                         | 0.447 / 0.338    |      |               |                         |
| AIC                                                         | 367.461       |      |               |                         | 158.916           |      |               |                         | 195.447          |      |               |                    | 168.506           |      |               |                         | 169.115          |      |               |                         |
| <b>S-DCT<sub>adj</sub> concentrations in serum</b>          |               |      |               |                         |                   |      |               |                         |                  |      |               |                    |                   |      |               |                         |                  |      |               |                         |
| <b>CYP2C19 IM+PM</b>                                        | -0.04         | 0.05 | -0.13 – -0.05 | 0.397                   | -                 | 0.12 | -0.35 – -0.11 | 0.309                   | -0.02            | 0.09 | -0.20 – -0.15 | 0.784              | -0.09             | 0.11 | -0.31 – -0.13 | 0.412                   | -0.12            | 0.09 | -0.31 – -0.07 | 0.201                   |
| <b>CYP2C19 RM+UM</b>                                        | 0.04          | 0.05 | -0.05 – -0.14 | 0.343                   | 0.02              | 0.11 | -0.20 – -0.23 | 0.878                   | 0.14             | 0.09 | -0.04 – -0.32 | 0.129              | 0.07              | 0.10 | -0.14 – -0.27 | 0.517                   | 0.08             | 0.10 | -0.11 – -0.28 | 0.389                   |
| <b>CYP2D6 IM+PM</b>                                         | -0.08         | 0.04 | -0.16 – -0.00 | 0.051                   | -                 | 0.09 | -0.28 – -0.06 | 0.190                   | -0.11            | 0.08 | -0.27 – -0.05 | 0.177              | -0.12             | 0.08 | -0.29 – -0.05 | 0.163                   | -0.12            | 0.09 | -0.29 – -0.05 | 0.175                   |
| n                                                           | 157           |      |               |                         | 65                |      |               |                         | 77               |      |               |                    | 66                |      |               |                         | 73               |      |               |                         |
| R <sup>2</sup> / R <sup>2</sup> adj                         | 0.174 / 0.105 |      |               |                         | 0.299 / 0.138     |      |               |                         | 0.246 / 0.105    |      |               |                    | 0.251 / 0.082     |      |               |                         | 0.220 / 0.064    |      |               |                         |
| AIC                                                         | 8.319         |      |               |                         | 53.353            |      |               |                         | 53.017           |      |               |                    | 50.952            |      |               |                         | 56.097           |      |               |                         |
| <b>S-DCT<sub>adj</sub>/ESC<sub>adj</sub> ratio in serum</b> |               |      |               |                         |                   |      |               |                         |                  |      |               |                    |                   |      |               |                         |                  |      |               |                         |

|                                     |       |               |                     |                      |           |               |                     |                     |       |               |                     |                     |       |               |                     |                          |       |               |                     |                          |
|-------------------------------------|-------|---------------|---------------------|----------------------|-----------|---------------|---------------------|---------------------|-------|---------------|---------------------|---------------------|-------|---------------|---------------------|--------------------------|-------|---------------|---------------------|--------------------------|
| <b>CYP2C19<br/>IM+PM</b>            | -0.13 | 0.04          | -0.20<br>–<br>-0.05 | <b>0.001<br/>***</b> | -<br>0.19 | 0.07          | -0.34<br>–<br>-0.05 | <b>0.008<br/>**</b> | -0.17 | 0.06          | -0.29<br>–<br>-0.04 | <b>0.008<br/>**</b> | -0.16 | 0.06          | -0.28<br>–<br>-0.05 | <b>0.007<br/>**</b>      | -0.22 | 0.06          | -0.34<br>–<br>-0.10 | <b>&lt;0.001<br/>***</b> |
| <b>CYP2C19<br/>RM+UM</b>            | 0.03  | 0.04          | -0.05<br>–<br>-0.10 | 0.462                | -<br>0.03 | 0.06          | -0.16<br>–<br>-0.10 | 0.654               | 0.05  | 0.06          | -0.07<br>–<br>-0.18 | 0.403               | 0.02  | 0.05          | -0.09<br>–<br>-0.12 | 0.730                    | -0.05 | 0.06          | -0.17<br>–<br>-0.07 | 0.420                    |
| <b>CYP2D6<br/>IM+PM</b>             | -0.11 | 0.03          | -0.17<br>–<br>-0.05 | <b>0.001<br/>***</b> | -<br>0.17 | 0.05          | -0.28<br>–<br>-0.07 | <b>0.002<br/>**</b> | 0.07  | 0.05          | -0.04<br>–<br>-0.18 | 0.206               | -0.20 | 0.04          | -0.28<br>–<br>-0.11 | <b>&lt;0.001<br/>***</b> | -0.00 | 0.05          | -0.11<br>–<br>-0.10 | 0.942                    |
| n                                   |       | 157           |                     |                      |           | 65            |                     |                     |       | 76            |                     |                     |       | 66            |                     |                          |       | 72            |                     |                          |
| R <sup>2</sup> / R <sup>2</sup> adj |       | 0.373 / 0.321 |                     |                      |           | 0.457 / 0.332 |                     |                     |       | 0.333 / 0.206 |                     |                     |       | 0.542 / 0.438 |                     |                          |       | 0.366 / 0.238 |                     |                          |
| AIC                                 |       | -59.260       |                     |                      |           | -11.298       |                     |                     |       | -4.780        |                     |                     |       | -36.228       |                     |                          |       | -15.476       |                     |                          |

Serum levels are adjusted for dosage.

AIC = Akaike information criterion; ARI = Aripiprazole; CI = confidence interval; ESC = Escitalopram; IM = Intermediate Metabolizer; NM = Normal Metabolizer; PM = Poor Metabolizer; RM = Rapid Metabolizer; SE = standard error; UM = Ultra-rapid Metabolizer.

\* $p < 0.05$ , \*\*  $p < 0.01$ , \*\*\*  $p < 0.001$ .

**Figure S14.** Serum concentrations of dose-corrected ESC by ungrouped *CYP2C19* and *CYP2D6* metabolizer phenotypes and treatment-arm.

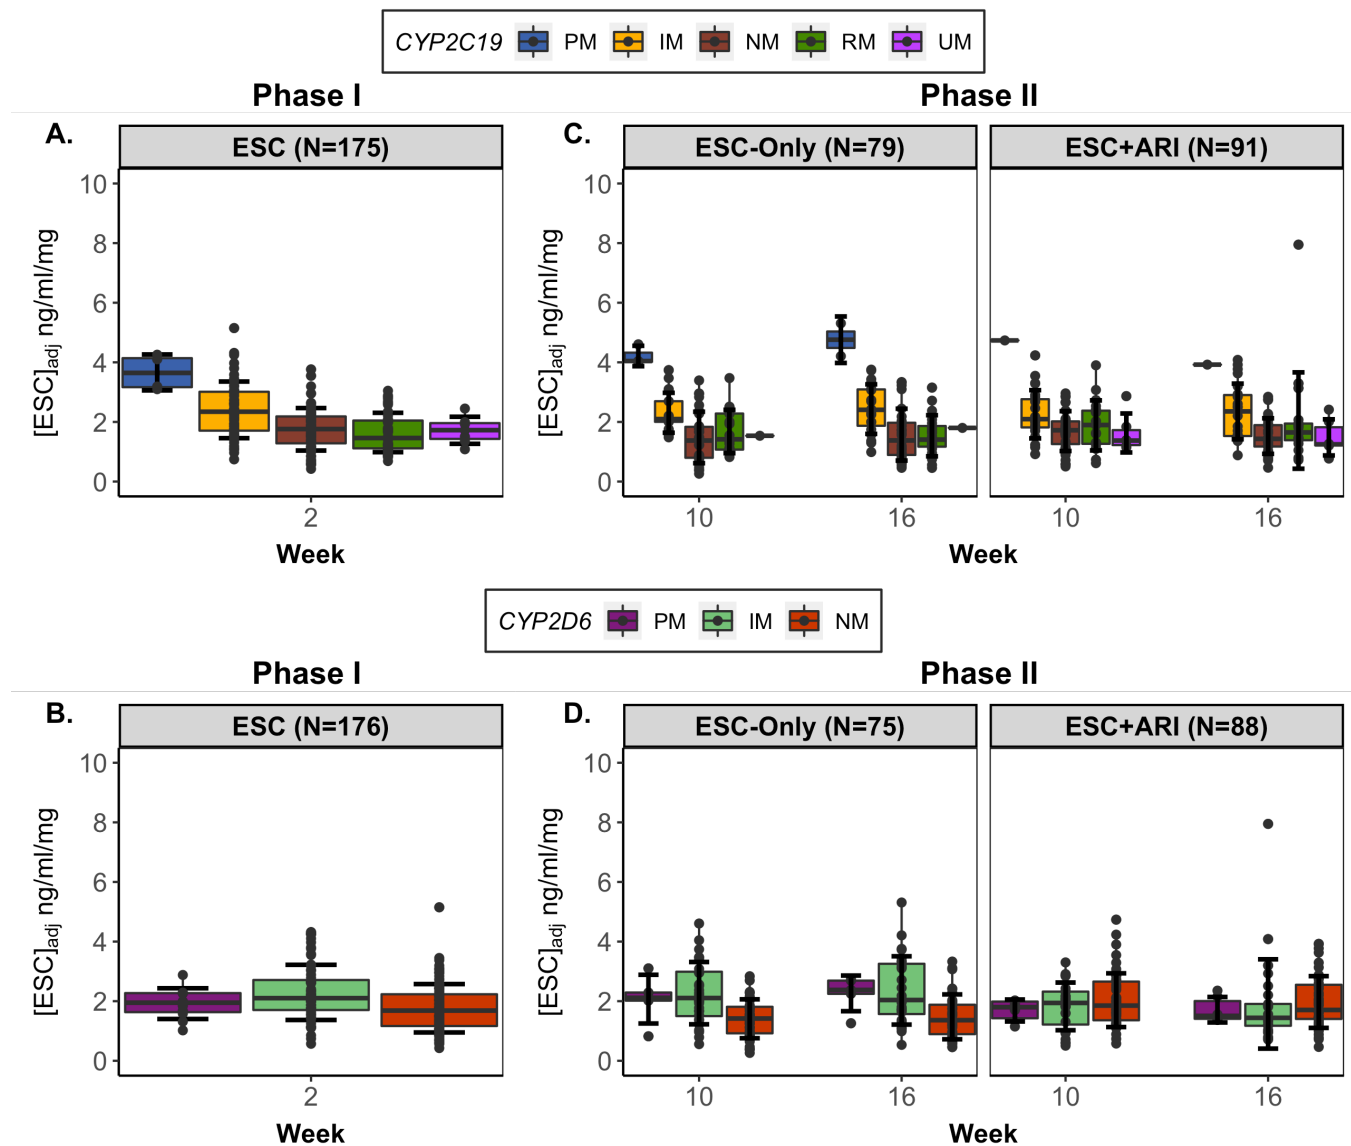

Descriptive plots of  $ESC_{adj}$  concentrations at Weeks 2, 10 and 16 by ungrouped *CYP2C19* and *CYP2D6* metabolizer phenotypes during Phases I and II. Error bars represent standard error.

ARI = Aripiprazole;  $ESC_{adj}$  = Dose-Adjusted Escitalopram; IM = Intermediate Metabolizer; NM = Normal Metabolizer; PM = Poor Metabolizer; RM = Rapid Metabolizer; UM = Ultra-rapid Metabolizer.

**Table S16.** Summary of linear regression models assessing associations of dose-adjusted serum concentrations of ESC, S-DCT, and S-DCT/ESC ratio at Weeks 2, 10 and 16 with CYP2C19 and CYP2D6 metabolizer groups for the European subset, adjusted for age, ancestry, sex, and recruitment site.

| Fixed Effects                                      | Week 2        |      |              |                | Week 10: ESC-Only |      |              |                | Week 10: ESC+ARI |      |              |               | Week 16: ESC-Only |      |              |                     | Week 16: ESC+ARI |      |              |               |
|----------------------------------------------------|---------------|------|--------------|----------------|-------------------|------|--------------|----------------|------------------|------|--------------|---------------|-------------------|------|--------------|---------------------|------------------|------|--------------|---------------|
|                                                    | B             | SE   | CI (95%)     | P-Value        | B                 | SE   | CI (95%)     | P-Value        | B                | SE   | CI (95%)     | P-Value       | B                 | SE   | CI (95%)     | P-Value             | B                | SE   | CI (95%)     | P-Value       |
| <b>ESC<sub>adj</sub> concentrations in serum</b>   |               |      |              |                |                   |      |              |                |                  |      |              |               |                   |      |              |                     |                  |      |              |               |
| <b>CYP2C19 IM+PM</b>                               | 0.50          | 0.17 | 0.17 – 0.83  | <b>0.003**</b> | 0.62              | 0.30 | 0.00 – 1.23  | <b>0.050</b>   | 0.60             | 0.26 | 0.06 – 1.13  | <b>0.029*</b> | 0.56              | 0.29 | -0.03 – 1.14 | 0.060               | 0.67             | 0.25 | 0.16 – 1.18  | <b>0.011*</b> |
| <b>CYP2C19 RM+UM</b>                               | -0.07         | 0.15 | -0.36 – 0.23 | 0.654          | 0.20              | 0.24 | -0.29 – 0.70 | 0.412          | 0.05             | 0.24 | -0.44 – 0.55 | 0.831         | -0.02             | 0.22 | -0.47 – 0.42 | 0.921               | 0.17             | 0.25 | -0.33 – 0.67 | 0.497         |
| <b>CYP2D6 IM+PM</b>                                | 0.35          | 0.13 | 0.09 – 0.61  | <b>0.010**</b> | 0.72              | 0.21 | 0.30 – 1.14  | <b>0.001**</b> | -0.29            | 0.23 | -0.75 – 0.17 | 0.206         | 0.96              | 0.20 | 0.56 – 1.37  | <b>&lt;0.001***</b> | -0.17            | 0.22 | -0.62 – 0.27 | 0.436         |
| n                                                  | 122           |      |              |                | 52                |      |              |                | 58               |      |              |               | 50                |      |              |                     | 56               |      |              |               |
| R <sup>2</sup> / R <sup>2</sup> adj                | 0.307 / 0.238 |      |              |                | 0.438 / 0.283     |      |              |                | 0.345 / 0.189    |      |              |               | 0.552 / 0.423     |      |              |                     | 0.344 / 0.180    |      |              |               |
| AIC                                                | 273.737       |      |              |                | 125.626           |      |              |                | 144.392          |      |              |               | 113.995           |      |              |                     | 137.884          |      |              |               |
| <b>S-DCT<sub>adj</sub> concentrations in serum</b> |               |      |              |                |                   |      |              |                |                  |      |              |               |                   |      |              |                     |                  |      |              |               |
| <b>CYP2C19 IM+PM</b>                               | -0.06         | 0.06 | -0.18 – 0.05 | 0.280          | -0.16             | 0.13 | -0.42 – 0.10 | 0.218          | -0.07            | 0.09 | -0.25 – 0.12 | 0.454         | -0.08             | 0.11 | -0.31 – 0.14 | 0.456               | -0.22            | 0.09 | -0.40 – 0.04 | <b>0.019*</b> |
| <b>CYP2C19 RM+UM</b>                               | 0.01          | 0.05 | -0.09 – 0.11 | 0.813          | -0.01             | 0.10 | -0.22 – 0.20 | 0.891          | 0.08             | 0.08 | -0.09 – 0.25 | 0.346         | 0.03              | 0.09 | -0.14 – 0.21 | 0.717               | -0.00            | 0.09 | -0.18 – 0.17 | 0.972         |
| <b>CYP2D6 IM+PM</b>                                | -0.08         | 0.05 | -0.17 – 0.01 | 0.081          | -0.07             | 0.09 | -0.24 – 0.11 | 0.440          | -0.13            | 0.08 | -0.29 – 0.03 | 0.102         | -0.05             | 0.08 | -0.21 – 0.11 | 0.559               | -0.14            | 0.08 | -0.29 – 0.02 | 0.091         |
| n                                                  | 120           |      |              |                | 51                |      |              |                | 59               |      |              |               | 49                |      |              |                     | 56               |      |              |               |
| R <sup>2</sup> / R <sup>2</sup> adj                | 0.213 / 0.133 |      |              |                | 0.421 / 0.257     |      |              |                | 0.376 / 0.230    |      |              |               | 0.457 / 0.295     |      |              |                     | 0.419 / 0.274    |      |              |               |
| AIC                                                | 10.908        |      |              |                | 32.407            |      |              |                | 22.218           |      |              |               | 18.612            |      |              |                     | 20.957           |      |              |               |

| S-DCT <sub>adj</sub> /ESC <sub>adj</sub> ratio in serum |               |      |                  |                            |               |      |                  |                           |               |      |                  |                          |               |      |                  |                                |               |      |                  |                                |
|---------------------------------------------------------|---------------|------|------------------|----------------------------|---------------|------|------------------|---------------------------|---------------|------|------------------|--------------------------|---------------|------|------------------|--------------------------------|---------------|------|------------------|--------------------------------|
| <b>CYP2C19<br/>IM+PM</b>                                | -0.13         | 0.05 | -0.23 –<br>-0.04 | <b>0.005</b><br><b>**</b>  | -0.23         | 0.09 | -0.42 –<br>-0.04 | <b>0.021</b><br><b>*</b>  | -0.19         | 0.07 | -0.34 –<br>-0.05 | <b>0.011</b><br><b>*</b> | -0.17         | 0.08 | -0.33 –<br>-0.01 | <b>0.043</b><br><b>*</b>       | -0.25         | 0.07 | -0.38 –<br>-0.12 | <b>&lt;0.001</b><br><b>***</b> |
| <b>CYP2C19<br/>RM+UM</b>                                | 0.02          | 0.04 | -0.06 –<br>0.10  | 0.640                      | -0.06         | 0.08 | -0.22 –<br>0.09  | 0.401                     | 0.04          | 0.07 | -0.10 –<br>0.17  | 0.608                    | -0.02         | 0.06 | -0.14 –<br>0.11  | 0.787                          | -0.08         | 0.06 | -0.20 –<br>0.05  | 0.245                          |
| <b>CYP2D6<br/>IM+PM</b>                                 | -0.13         | 0.04 | -0.20 –<br>-0.05 | <b>0.001</b><br><b>***</b> | -0.19         | 0.06 | -0.31 –<br>-0.06 | <b>0.005</b><br><b>**</b> | 0.09          | 0.06 | -0.04 –<br>0.22  | 0.159                    | -0.24         | 0.06 | -0.35 –<br>-0.12 | <b>&lt;0.001</b><br><b>***</b> | -0.03         | 0.06 | -0.15 –<br>0.08  | 0.551                          |
| n                                                       | 120           |      |                  |                            | 51            |      |                  |                           | 58            |      |                  |                          | 49            |      |                  |                                | 55            |      |                  |                                |
| R <sup>2</sup> /<br>R <sup>2</sup> adj                  | 0.393 / 0.331 |      |                  |                            | 0.440 / 0.282 |      |                  |                           | 0.440 / 0.306 |      |                  |                          | 0.492 / 0.341 |      |                  |                                | 0.426 / 0.279 |      |                  |                                |
| AIC                                                     | -36.767       |      |                  |                            | 0.964         |      |                  |                           | -4.545        |      |                  |                          | -14.594       |      |                  |                                | -13.894       |      |                  |                                |

Serum levels are adjusted for dosage.

AIC = Akaike information criterion; ARI = Aripiprazole; CI = confidence interval; ESC = Escitalopram; IM = Intermediate Metabolizer; NM = Normal Metabolizer; PM = Poor Metabolizer; RM = Rapid Metabolizer; SE = standard error; UM = Ultra-rapid Metabolizer.

\* $p < 0.05$ , \*\*  $p < 0.01$ , \*\*\*  $p < 0.001$ .

**Figure S15.** Serum concentrations of dose-corrected ESC by *CYP2C19* and *CYP2D6* treatment arm and metabolizer groups during Phase II.

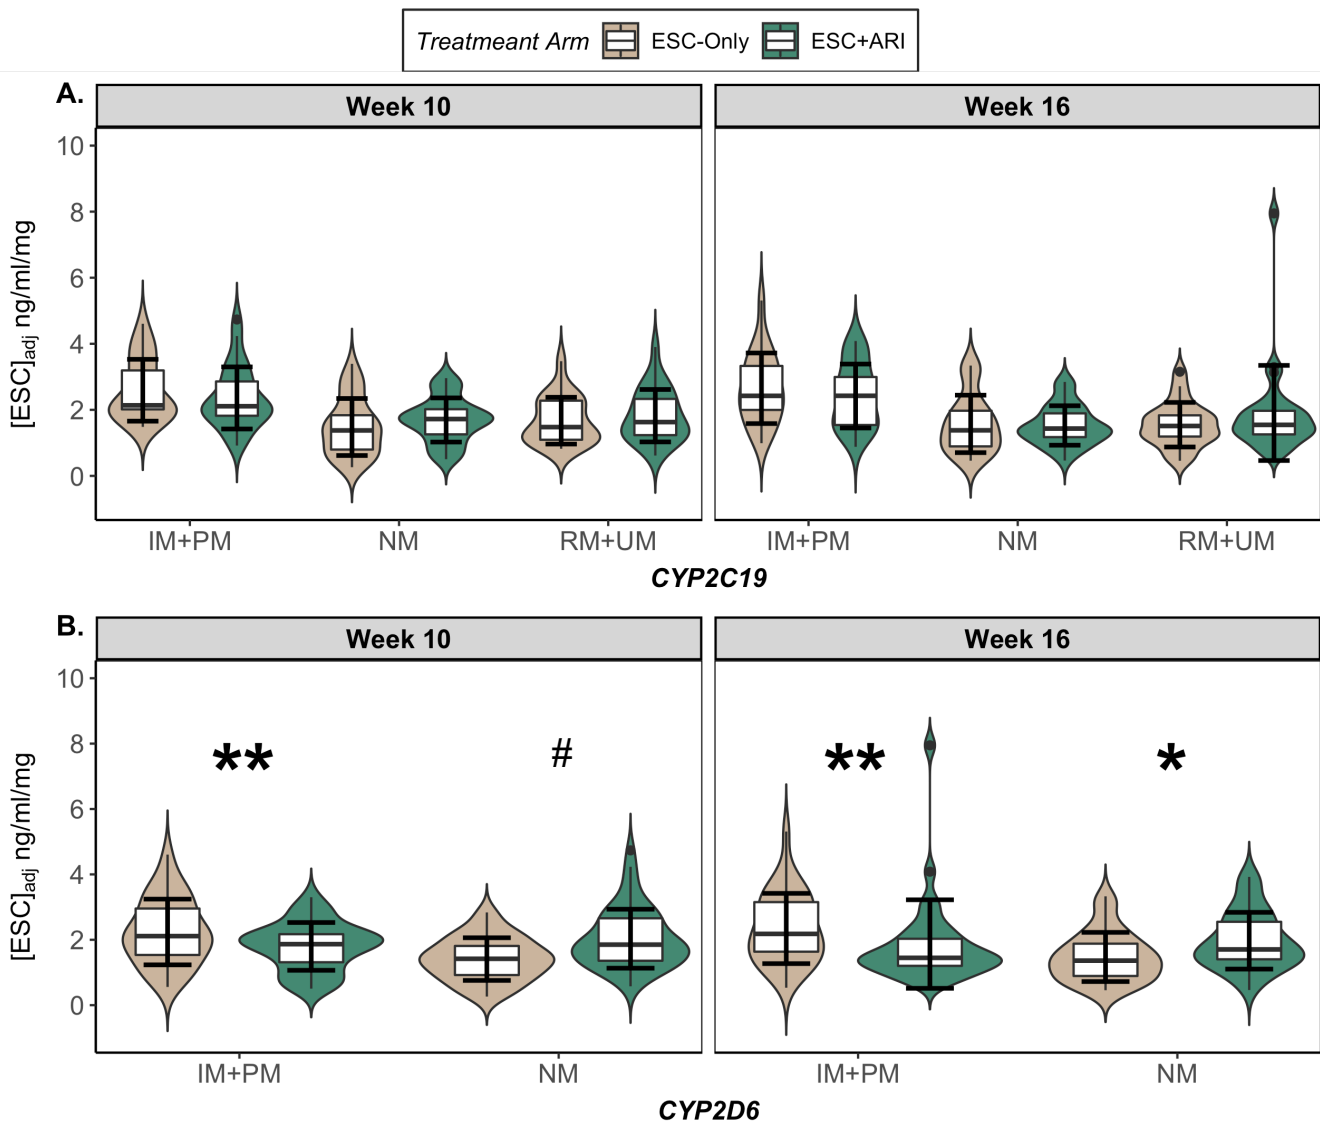

**(A)** *CYP2C19* NMs, IM+PMs, and RM+UMs did not differ in ESC<sub>adj</sub> concentrations by treatment arm, whereas **(B)** *CYP2D6* NMs in ESC+ARI demonstrated significantly higher ESC<sub>adj</sub> serum levels compared to *CYP2D6* NMs in ESC-Only at both Weeks 10 (W=381,  $p=0.050$ ,  $r=-0.52$ ) and 16 (W=549,  $p=0.006$ ,  $r=-0.47$ ). *CYP2D6* IM+PMs in ESC+ARI had lower ESC levels than *CYP2D6* IM+PMs in ESC-Only at Week 16 (W=689,  $p=0.017$ ,  $r=-0.56$ ). Error bars represent standard error.

ARI = Aripiprazole; ESC<sub>adj</sub> = Dose-Adjusted Escitalopram; IM = Intermediate Metabolizer; NM = Normal Metabolizer; PM = Poor Metabolizer; RM = Rapid Metabolizer; UM = Ultra-rapid Metabolizer.

\*\* $p<0.01$ ; \* $p<0.05$ ; # indicates trend with  $p$  between 0.050 and 0.070.



**Figure S16.** Serum concentrations of dose-corrected S-DCT by *CYP2C19* and *CYP2D6* metabolizer groups and treatment-arm.

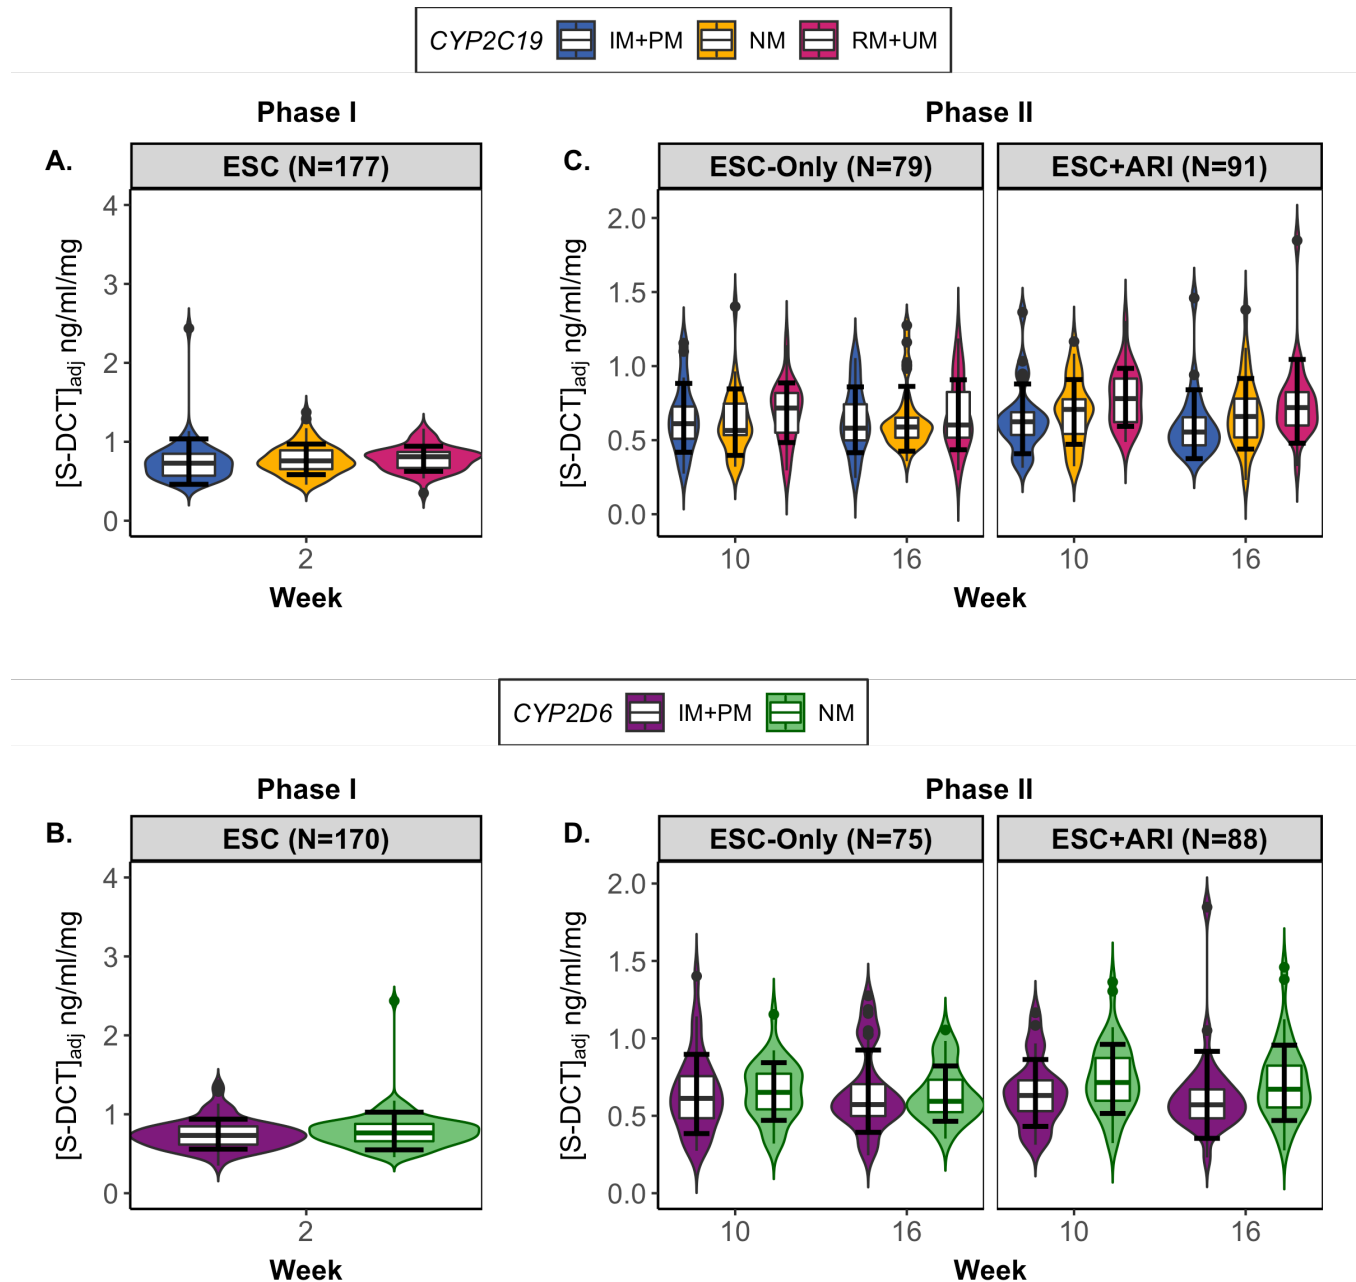

S-DCT<sub>adj</sub> was not associated with either *CYP2C19* or *CYP2D6* metabolizer groups during (A-B) Phase I or (C-D) Phase II. All linear regression analyses were adjusted for age, ancestry, sex, site, time since last dose, *CYP2C19* or *CYP2D6* metabolizer groups. Error bars represent standard error. *P*-values are corrected for multiple testing using the false discovery rate (FDR) approach.

ARI = Aripiprazole; ESC = Escitalopram; NM = normal metabolizer, PM = Poor Metabolizer; RM = Rapid Metabolizer; SE = standard error; S-DCT = S-desmethylcitalopram; UM = Ultra-rapid Metabolizer.

\*  $q < 0.05$ , \*\*  $q < 0.01$ , \*\*\*  $q < 0.001$ .

**Figure S17.** Dose-adjusted serum S-DCT<sub>adj</sub>/ESC<sub>adj</sub> ratio for Phase I and II by ungrouped *CYP2C19* and *CYP2D6* metabolizer phenotypes.



Descriptive plots of S-DCT<sub>adj</sub>/ESC<sub>adj</sub> concentrations at Weeks 2, 10 and 16 by ungrouped *CYP2C19* and *CYP2D6* metabolizer phenotypes during Phases I and II. Error bars represent standard error.

ARI = Aripiprazole; ESC<sub>adj</sub> = Dose-Adjusted Escitalopram; IM = Intermediate Metabolizer; NM = Normal Metabolizer; PM = Poor Metabolizer; RM = Rapid Metabolizer; UM = Ultra-rapid Metabolizer.

**Table S17.** Summary of linear regression models assessing associations of dose-adjusted serum concentrations of ARI, DHA, and DHA/ARI ratio at Weeks 10 and 16 with CYP2D6 metabolizer status, adjusted for age, ancestry, sex, and recruitment site.

| Fixed Effects                            | Week 10       |      |               |              | Week 16        |      |               |              |
|------------------------------------------|---------------|------|---------------|--------------|----------------|------|---------------|--------------|
|                                          | B             | SE   | CI (95%)      | P-Value      | B              | SE   | CI (95%)      | P-Value      |
| <b>ARI concentrations in serum</b>       |               |      |               |              |                |      |               |              |
| <b>CYP2D6 IM+PM</b>                      | -2.48         | 1.38 | -5.23 – -0.27 | 0.076        | 1.54           | 1.70 | -1.86 – 4.95  | 0.369        |
| Observations                             | 77            |      |               |              | 74             |      |               |              |
| R <sup>2</sup> / R <sup>2</sup> adjusted | 0.253 / 0.139 |      |               |              | 0.101 / -0.042 |      |               |              |
| AIC                                      | 490.809       |      |               |              | 501.372        |      |               |              |
| <b>DHA concentrations in serum</b>       |               |      |               |              |                |      |               |              |
| <b>CYP2D6 IM+PM</b>                      | -0.99 **      | 0.34 | -1.67 – -0.30 | <b>0.006</b> | -0.47          | 0.58 | -1.63 – 0.69  | 0.420        |
| Observations                             | 72            |      |               |              | 72             |      |               |              |
| R <sup>2</sup> / R <sup>2</sup> adjusted | 0.230 / 0.104 |      |               |              | 0.033 / -0.125 |      |               |              |
| AIC                                      | 249.848       |      |               |              | 330.658        |      |               |              |
| <b>DHA/ARI ratio in serum</b>            |               |      |               |              |                |      |               |              |
| <b>CYP2D6 IM+PM</b>                      | -0.05 *       | 0.02 | -0.09 – -0.01 | <b>0.028</b> | -0.07 *        | 0.03 | -0.12 – -0.02 | <b>0.010</b> |
| Observations                             | 72            |      |               |              | 72             |      |               |              |
| R <sup>2</sup> / R <sup>2</sup> adjusted | 0.383 / 0.281 |      |               |              | 0.289 / 0.172  |      |               |              |
| AIC                                      | -158.842      |      |               |              | -111.987       |      |               |              |

Serum levels are adjusted for dosage.

AIC=Akaike information criterion; ARI=Aripiprazole; CI=confidence interval; DHA = dehydroaripiprazole; ESC=Escitalopram; IM = Intermediate Metabolizer; NM = Normal Metabolizer; PM = Poor Metabolizer; SE=standard error.

\* $p < 0.05$ , \*\*  $p < 0.01$ , \*\*\*  $p < 0.001$ .

**Figure S18.** Serum concentrations of dose-corrected  $ARI_{adj}$ ,  $DHA_{adj}$ , and the  $DHA_{adj}/ARI_{adj}$  ratio for the ESC+ARI treatment arm by *CYP2D6* metabolizer group.

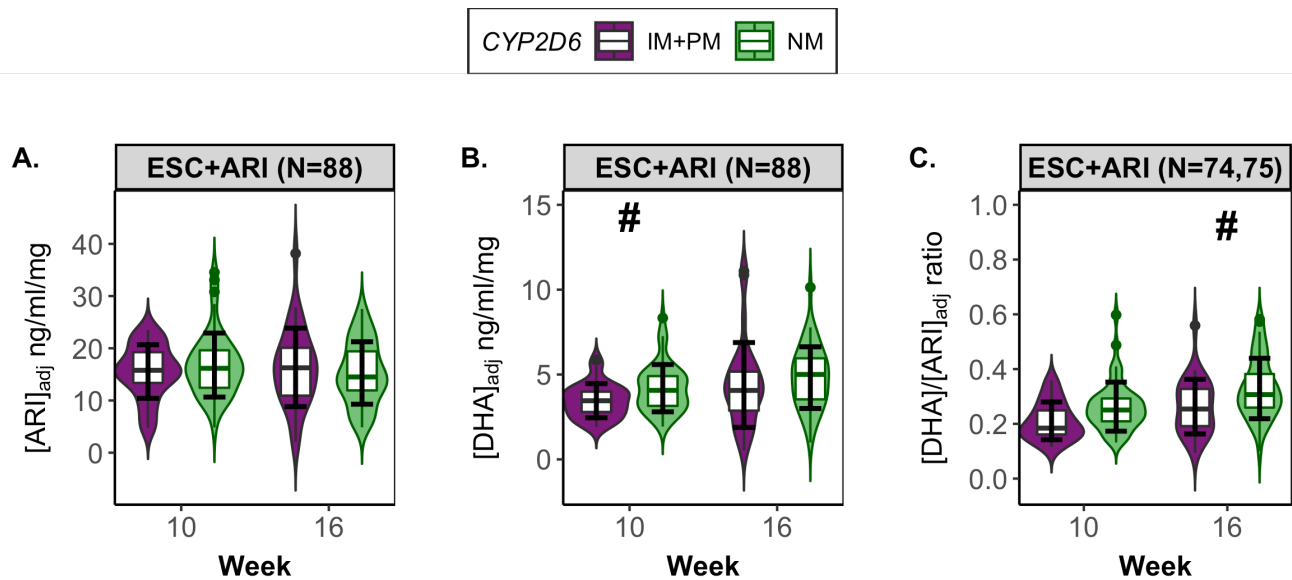

During Phase II, in the ESC+ARI treatment arm, mean (A)  $ARI_{adj}$  serum concentrations were not associated with *CYP2D6* metabolizer groups. (B) A trend for an association was observed between serum  $DHA_{adj}$  concentrations and *CYP2D6* metabolizer groups at Week 10 with IM+PMs demonstrating lower  $DHA_{adj}$  concentrations relative to NMs. (C) A trend for an association was observed between serum  $DHA/ARI_{adj}$  ratio and *CYP2D6* metabolizer groups with *CYP2D6* IM+PMs showing lower  $ARI_{adj}/DHA_{adj}$  ratio compared to NMs at only Week 16.

All linear regression analyses were adjusted for age, ancestry, sex, site, and time since last dose. Error bars represent standard error.

ARI = Aripiprazole; DHA = dehydroaripiprazole; ESC = Escitalopram; IM = Intermediate Metabolizer; NM = Normal Metabolizer; PM = Poor Metabolizer.

# indicates trend with  $q$  between 0.050 to 0.070.

**Figure S19.** Serum concentrations of dose-corrected  $ARI_{adj}$ ,  $DHA_{adj}$ , and the  $DHA_{adj}/ARI_{adj}$  ratio for the ESC+ARI treatment arm by ungrouped *CYP2D6* metabolizer group.

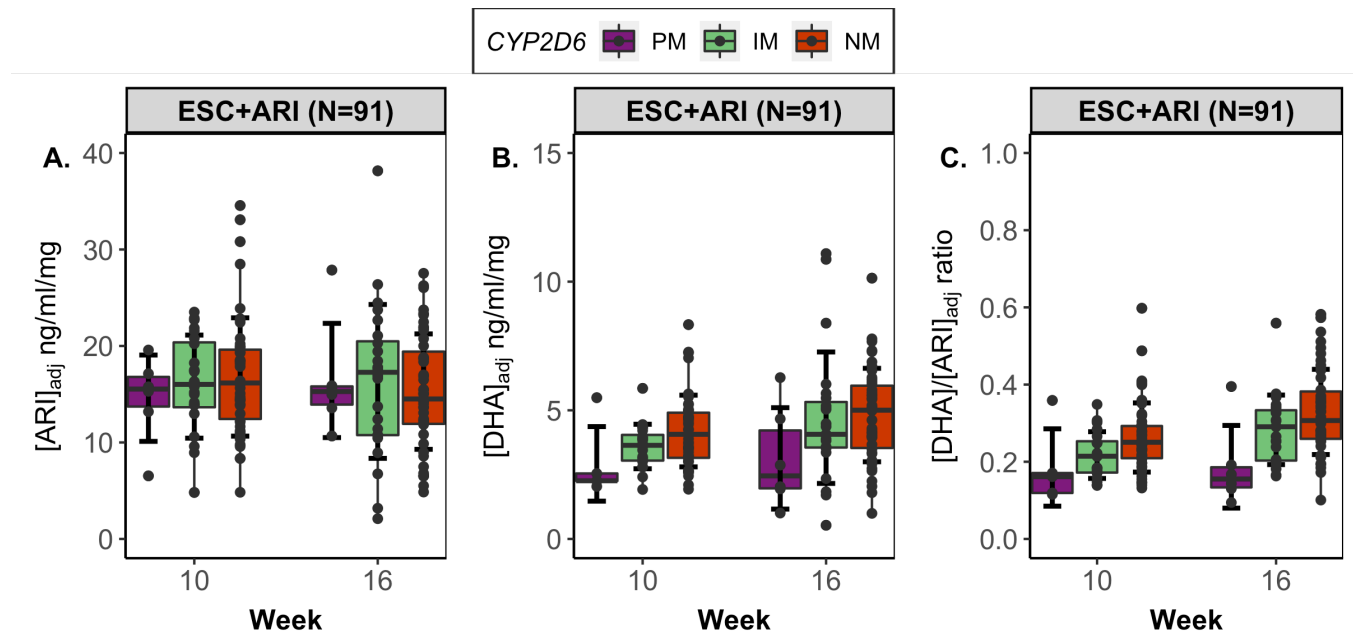

Descriptive plots of  $ARI_{adj}$ ,  $DHA_{adj}$ , and the  $DHA_{adj}/ARI_{adj}$  ratio in serum at Weeks 10 and 16 by ungrouped *CYP2D6* metabolizer phenotypes during Phases II. Error bars represent standard error.

ARI = Aripiprazole; ESC<sub>adj</sub> = Dose-Adjusted Escitalopram; IM = Intermediate Metabolizer; NM = Normal Metabolizer; PM = Poor Metabolizer.

**Table S18.** Summary of linear regression models assessing associations of dose-adjusted serum concentrations of ARI, DHA, and DHA/ARI ratio at Weeks 10 and 16 with CYP2D6 metabolizer status for the European subset, adjusted for age, ancestry, sex, and recruitment site.

| Fixed Effects                            | Week 10 |      |               |                | Week 16 |      |                |               |
|------------------------------------------|---------|------|---------------|----------------|---------|------|----------------|---------------|
|                                          | B       | SE   | CI (95%)      | P-Value        | B       | SE   | CI (95%)       | P-Value       |
| <b>ARI concentrations in serum</b>       |         |      |               |                |         |      |                |               |
| <b>CYP2D6 IM+PM</b>                      | -3.21   | 1.60 | -6.43 – -0.01 | 0.051          | 2.47    | 1.97 | -1.49 – 6.42   | 0.216         |
| Observations                             |         |      | 58            |                |         |      | 57             |               |
| R <sup>2</sup> / R <sup>2</sup> adjusted |         |      | 0.309 / 0.179 |                |         |      | 0.145 / -0.019 |               |
| AIC                                      |         |      | 369.596       |                |         |      | 388.198        |               |
| <b>DHA concentrations in serum</b>       |         |      |               |                |         |      |                |               |
| <b>CYP2D6 IM+PM</b>                      | -1.27   | 0.42 | -2.13 – -0.42 | <b>0.004**</b> | -0.08   | 0.73 | -1.55 – 1.38   | 0.908         |
| Observations                             |         |      | 55            |                |         |      | 56             |               |
| R <sup>2</sup> / R <sup>2</sup> adjusted |         |      | 0.237 / 0.085 |                |         |      | 0.044 / -0.143 |               |
| AIC                                      |         |      | 194.887       |                |         |      | 268.727        |               |
| <b>DHA/ARI ratio in serum</b>            |         |      |               |                |         |      |                |               |
| <b>CYP2D6 IM+PM</b>                      | -0.05   | 0.02 | -0.10 – -0.01 | <b>0.028*</b>  | -0.07   | 0.03 | -0.14 – -0.01  | <b>0.022*</b> |
| Observations                             |         |      | 55            |                |         |      | 56             |               |
| R <sup>2</sup> / R <sup>2</sup> adjusted |         |      | 0.374 / 0.249 |                |         |      | 0.357 / 0.231  |               |
| AIC                                      |         |      | -129.074      |                |         |      | -82.646        |               |

Serum levels are adjusted for dosage.

AIC=Akaike information criterion; ARI=Aripiprazole; CI=confidence interval; DHA = dehydroaripiprazole; ESC=Escitalopram; IM = Intermediate Metabolizer; NM = Normal Metabolizer; PM = Poor Metabolizer; SE=standard error.

\* $p < 0.05$ , \*\*  $p < 0.01$ , \*\*\*  $p < 0.001$ .

**Table S19.** Spearman correlations of measures of serum concentrations with symptom improvement from baseline and intensity of side effects at Weeks 2, 10 and 16.

|                            | Week 2 of Phase I     |                         |                               |
|----------------------------|-----------------------|-------------------------|-------------------------------|
|                            | [ESC <sub>adj</sub> ] | [S-DCT <sub>adj</sub> ] | [S-DCT]/[ESC <sub>adj</sub> ] |
| %Δ in MADRS from Baseline  | -0.09                 | -0.19                   | -0.002                        |
| CNS intensity              | -0.02                 | 0.05                    | 0.05                          |
| Gastrointestinal intensity | 0.03                  | 0.07                    | 0.01                          |
| Sexual intensity           | -0.06                 | -0.02                   | 0.03                          |
| Weight gain intensity      | 0.02                  | -0.16                   | -0.08                         |

|                            | ESC-Only: Week 10 of Phase II |                         |                               |
|----------------------------|-------------------------------|-------------------------|-------------------------------|
|                            | [ESC <sub>adj</sub> ]         | [S-DCT <sub>adj</sub> ] | [S-DCT]/[ESC <sub>adj</sub> ] |
| %Δ in MADRS from Baseline  | -0.09                         | -0.11                   | 0.03                          |
| CNS intensity              | 0.20                          | 0.23                    | -0.20                         |
| Gastrointestinal intensity | -0.13                         | -0.06                   | 0.11                          |
| Sexual intensity           | <b>-0.36*</b>                 | -0.05                   | <b>0.41*</b>                  |
| Weight gain intensity      | -0.02                         | -0.09                   | -0.04                         |

|                            | ESC-Only: Week 16 of Phase II |                         |                               |
|----------------------------|-------------------------------|-------------------------|-------------------------------|
|                            | [ESC <sub>adj</sub> ]         | [S-DCT <sub>adj</sub> ] | [S-DCT]/[ESC <sub>adj</sub> ] |
| %Δ in MADRS from Baseline  | 0.16                          | 0.39                    | 0.49                          |
| CNS intensity              | 0.77                          | 0.44                    | 0.99                          |
| Gastrointestinal intensity | 0.21                          | 0.38                    | 0.18                          |
| Sexual intensity           | 0.42                          | 0.73                    | 0.11                          |
| Weight gain intensity      | 0.058                         | 0.019                   | 0.31                          |

ESC+ARI: Week 10 of Phase II

|                            | [ESC <sub>adj</sub> ] | [S-DCT <sub>adj</sub> ] | [S-DCT]/[ESC <sub>adj</sub> ] | [ARI <sub>adj</sub> ] | [DHA <sub>adj</sub> ] | [DHA]/[ARI <sub>adj</sub> ] |
|----------------------------|-----------------------|-------------------------|-------------------------------|-----------------------|-----------------------|-----------------------------|
| %Δ in MADRS from Baseline  | -0.1                  | -0.02                   | 0.12                          | 0.06                  | -0.09                 | -0.03                       |
| CNS intensity              | 0.07                  | 0.007                   | -0.02                         | 0.09                  | -0.15                 | -0.15                       |
| Gastrointestinal intensity | 0.07                  | -0.01                   | -0.05                         | -0.09                 | -0.23                 | -0.13                       |
| Sexual intensity           | -0.03                 | -0.09                   | -0.02                         | 0.004                 | -0.23                 | -0.23                       |
| Weight gain intensity      | 0.3                   | 0.13                    | -0.17                         | 0.15                  | -0.03                 | -0.19                       |

ESC+ARI: Week 16 of Phase II

|                            | [ESC <sub>adj</sub> ] | [S-DCT <sub>adj</sub> ] | [S-DCT]/[ESC <sub>adj</sub> ] | [ARI <sub>adj</sub> ] | [DHA <sub>adj</sub> ] | [DHA]/[ARI <sub>adj</sub> ] |
|----------------------------|-----------------------|-------------------------|-------------------------------|-----------------------|-----------------------|-----------------------------|
| %Δ in MADRS from Baseline  | -0.10                 | 0.03                    | 0.09                          | <b>-0.36*</b>         | <b>-0.35*</b>         | 0.26                        |
| CNS intensity              | 0.12                  | 0.11                    | -0.12                         | 0.09                  | 0.11                  | -0.08                       |
| Gastrointestinal intensity | 0.21                  | 0.26                    | -0.09                         | -0.02                 | -0.04                 | -0.04                       |
| Sexual intensity           | 0.01                  | 0.05                    | -0.09                         | -0.02                 | -0.12                 | -0.09                       |
| Weight gain intensity      | 0.23                  | 0.1                     | -0.10                         | 0.16                  | 0.14                  | -0.02                       |

Serum levels are adjusted for dosage.

ARI = Aripiprazole; DHA = dehydroaripiprazole; ESC = Escitalopram; MADRS = Montgomery-Asberg Depression Rating Scale; S-DCT = S-desmethylcitalopram.

\* $q < 0.05$

**Figure S20.** Spearman correlation between ESC metabolite-to-drug ratio and sexual side effect intensity at Week 10.

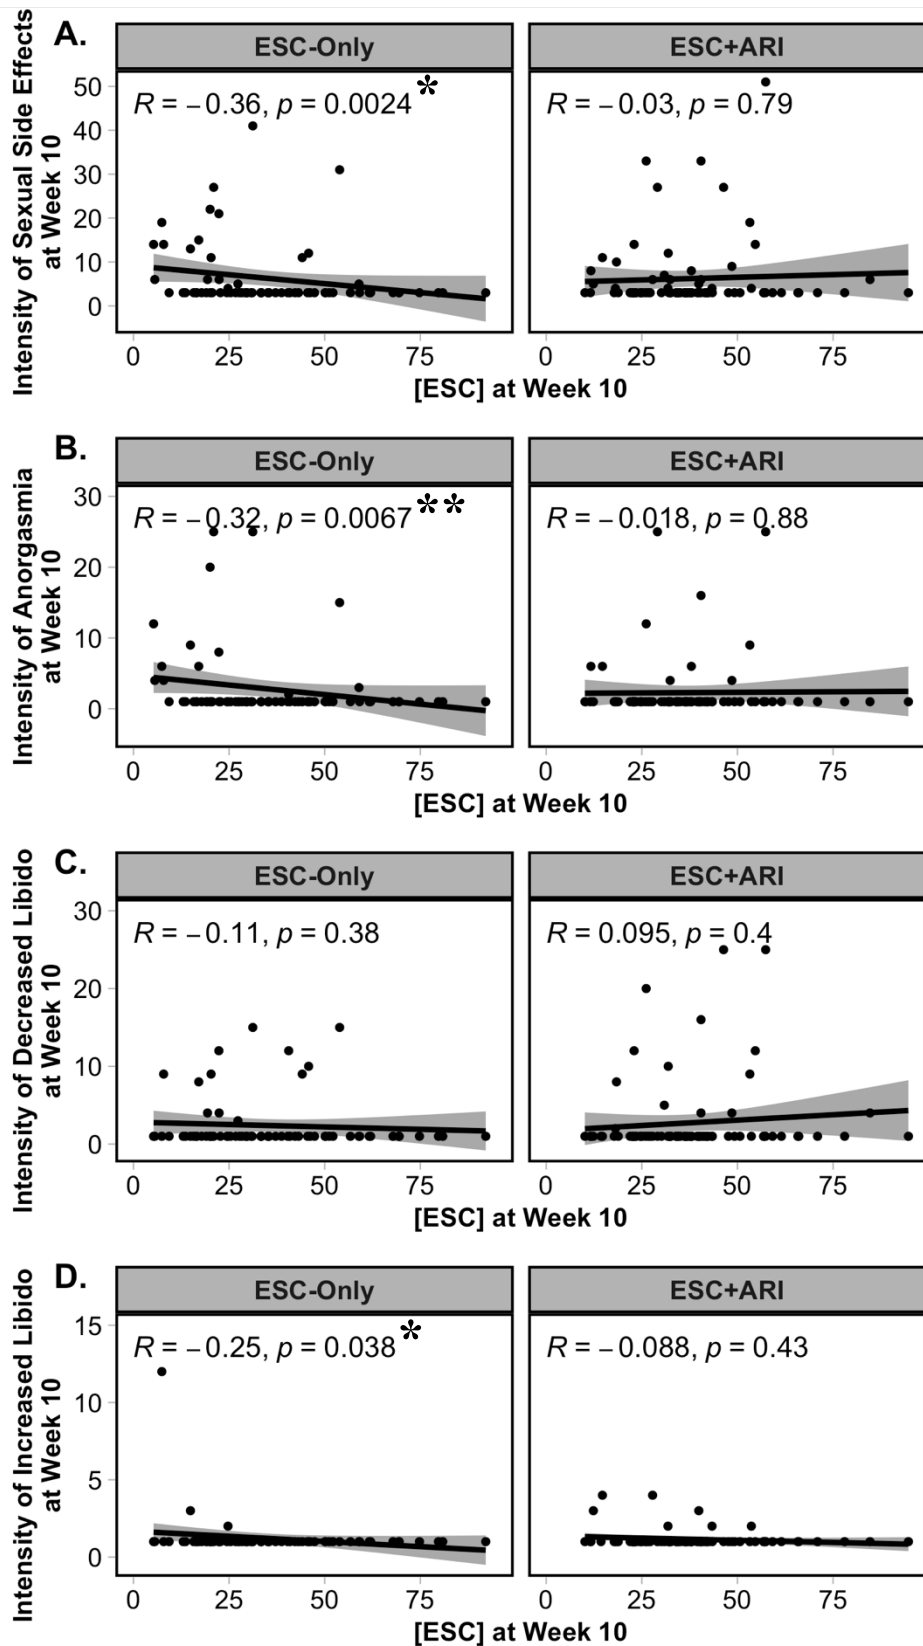

(A) During Phase 1, the intensity of sexual side effects was significantly correlated with the ESC metabolite-to-drug ratio (R=-0.36,

p=0.0024).



$p < 0.001$ ,  $q = 0.035$ ). The lower the serum levels of ESC, the greater the intensity of sexual side effects that is reported. The ESC+ARI treatment arm did not show this effect. *Post-hoc* analyses revealed this effect was driven by a significant correlation between serum ESC<sub>i</sub> levels and intensity of anorgasmia ( $R = -0.32$ ,  $p = 0.007$ ) and decreased libido ( $R = -0.25$ ,  $p = 0.038$ ).

ESC = Escitalopram; S-DCT = S-desmethylescitalopram.

\* $p < 0.05$ ; \*\* $p < 0.01$

**Figure S21.** Spearman correlation between concentrations of ARI and metabolite-to-drug ratio and symptom improvement from baseline at Week 16.

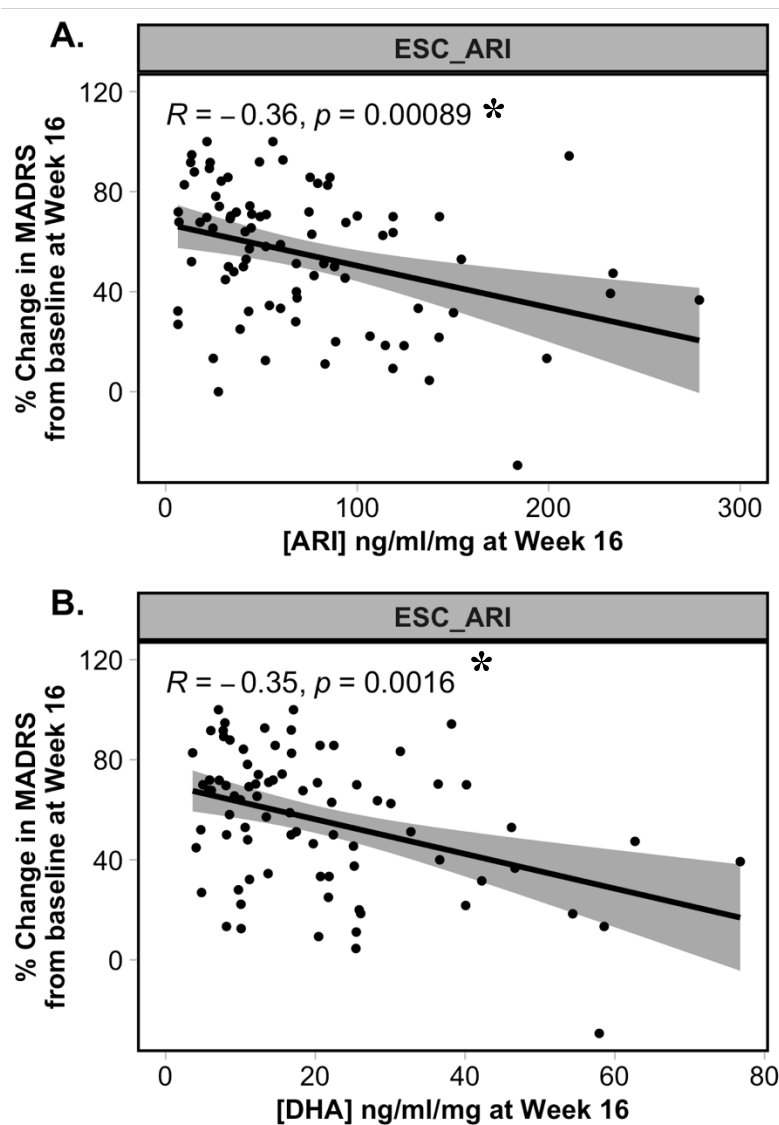

During Phase II, in the ESC+ARI treatment arm, unadjusted serum **(A)** ARI and **(B)** DHA concentrations were significantly correlated percent change in MADRS from baseline at Week 16, following correcting for multiple testing ( $R=-0.36, p<0.001, q=0.048$ ;  $R=-0.35, p<0.001, q=0.048$ , respectively). The higher the concentration of ARI and DHA in this treatment arm, the lower the percentage symptom improvement at Week 16.

ARI = Aripiprazole; DHA = Dehydroaripiprazole.

\* $p<0.05$

**Figure S22.** Summary of the mediation analysis with dose-adjusted escitalopram serum concentrations at Week 16 as mediator of the relationship between *CYP2C19* and *CYP2C6* metabolizer groups and total symptom improvement in the ESC-Only treatment arm.

**A.**

|                                         | Model 1  |                 |                         | Model 2  |               |                         | Model 3  |                 |                         |
|-----------------------------------------|----------|-----------------|-------------------------|----------|---------------|-------------------------|----------|-----------------|-------------------------|
|                                         | <b>B</b> | <b>CI</b>       | <b>p</b>                | <b>B</b> | <b>CI</b>     | <b>p</b>                | <b>B</b> | <b>CI</b>       | <b>p</b>                |
| (Intercept)                             | 83.93    | [74.91, 92.95]  | <b>&lt;0.001</b><br>*** | 1.22     | [0.88, 1.56]  | <b>&lt;0.001</b><br>*** | 92.13    | [80.37, 103.89] | <b>&lt;0.001</b><br>*** |
| <i>CYP2C19</i><br>IM+PM                 | -14.97   | [-27.08, -2.85] | <b>0.016</b><br>*       | 1.00     | [0.54, 1.46]  | <b>&lt;0.001</b><br>*** | -8.26    | [-21.69, 5.17]  | 0.224                   |
| <i>CYP2C19</i><br>RM+UM                 | -3.14    | [-15.41, 9.13]  | 0.611                   | -0.10    | [-0.56, 0.37] | 0.678                   | -3.79    | [-15.77, 8.19]  | 0.530                   |
| <i>CYP2D6</i><br>IM+PM                  | -1.86    | [-11.97, 8.26]  | 0.715                   | 0.82     | [0.43, 1.20]  | <b>&lt;0.001</b><br>*** | 3.63     | [-7.54, 14.79]  | 0.519                   |
| ESC <sub>adj</sub> levels at<br>Week 16 |          |                 |                         |          |               |                         | -6.70    | [-13.08, -0.32] | <b>0.040</b><br>*       |
| N                                       | 69       |                 |                         | 69       |               |                         | 69       |                 |                         |
| R2                                      | 0.09     |                 |                         | 0.41     |               |                         | 0.15     |                 |                         |

**B.**

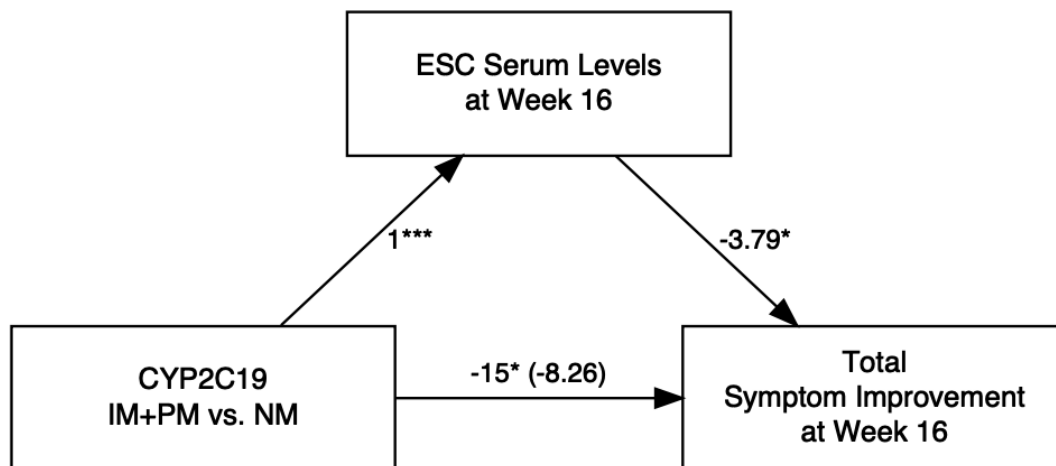

C.

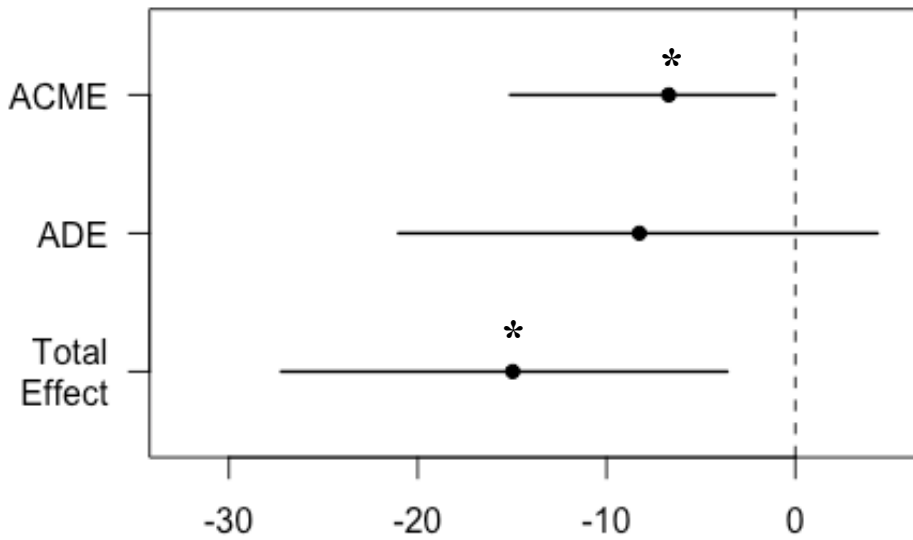

|                | Estimate | 95% CI Lower | 95% CI Upper | p-value |
|----------------|----------|--------------|--------------|---------|
| ACME           | -6.71    | -15.00       | -0.98        | 0.020 * |
| ADE            | -8.26    | -20.97       | 4.64         | 0.193   |
| Total Effect   | -14.97   | -27.16       | -3.05        | 0.014 * |
| Prop. Mediated | 0.45     | 0.05         | 1.71         | 0.033 * |

The three linear regression models performed are shown in (A). Model 1 revealed that *CYP2C19* IM+PMs showed lower symptom improvement at Week 16 compared to NMs. Model 2 revealed that *CYP2C19* IM+PMs also showed higher ESC<sub>adj</sub> serum levels at W16 compared to NMs. In Model 3, relationship between *CYP2C19* metabolizer group and total symptom improvement after controlling for ESC<sub>adj</sub> serum concentrations was not significant, while ESC serum concentrations were significantly associated with total symptom improvement at Week 16. Effects are indicated by regression coefficients in overall mediation model shown in (B), where indirect effect of *CYP2C19* metabolizer group on total symptom improvement is shown in parenthesis. Results of the nonparametric bootstrap analyses with 5000 simulations (C) estimated a percent mediation of 45% indicating that about half of the effect of *CYP2C19* IM+PM phenotype on symptom improvement may be mediated by ESC serum levels.

ACME=average causal mediation effects, ADE=average direct effect, ESC<sub>adj</sub> = escitalopram adjusted for dosage, IM=intermediate metabolizer; NM=normal metabolizers; PM=poor metabolizer; RM=rapid metabolizer; UM=ultra-rapid metabolizer.

\*\*\* $p < 0.001$ ; \*\* $p < 0.01$ ; \* $p < 0.05$ .

**Figure S23.** The relationship between total symptom improvement and serum levels of ESC, corrected for dosage, at trial end by *CYP2C19* metabolizer phenotypes for each treatment arm.

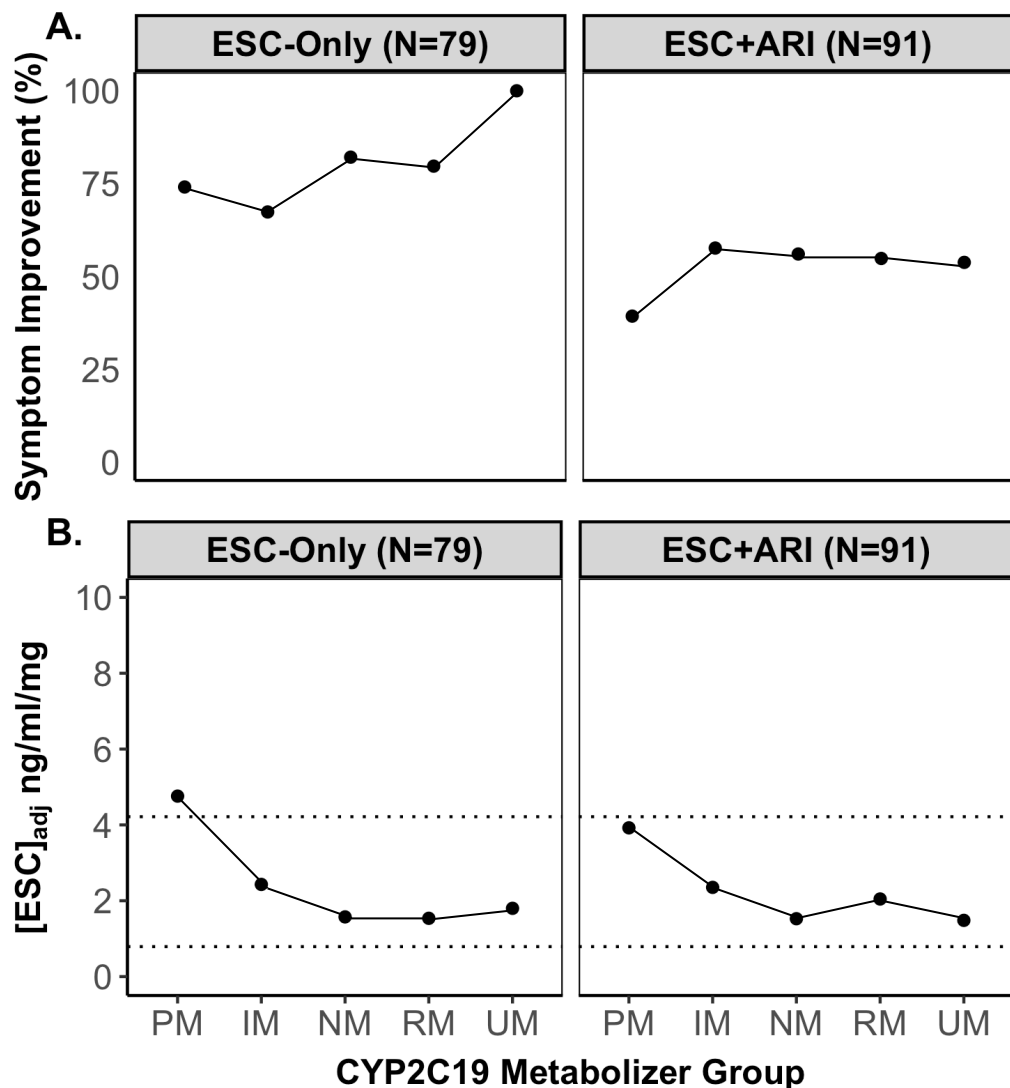

Those with slower *CYP2C19* enzymatic capacity demonstrate **(A)** lower total symptom improvement and **(B)** higher  $ESC_{adj}$  serum levels at trial end in the ESC-Only treatment arm. In ESC+ARI, *CYP2C19* PMs demonstrate the **(A)** lowest symptom improvement and **(B)** highest ESC serum concentrations; however, symptom improvement between IMs, NMs, RMs, and UMs do not significantly differ.

The dotted line represents the therapeutic range, which is the serum concentration usually expected to achieve the desired therapeutic effect.

$ESC_{adj}$  = escitalopram adjusted for dosage; IM=intermediate metabolizer; NM=normal metabolizers; PM=poor metabolizer; RM=rapid metabolizer; UM=ultra-rapid metabolizer.
